# Supplementary material
Source: Royal Society of Chemistry journal article supplement (doi:10.1039/d6su00092d)
Supplement: d6su00092d1.pdf [file d6su00092d1.pdf]

1           **Supporting Information for “SimpleBox4nano: Environmental Fate**  
2           **Modelling of Nanomaterials via the Enalos Cloud Platform”**

3 Dimitris G. Mintis,<sup>a, b</sup> Sotiris Kallishis,<sup>a, b</sup> Panagiotis D. Kolokathis,<sup>b, c</sup> Andreas Tsoumanis,<sup>a, b</sup> Georgia  
4 Melagraki,<sup>d</sup> Joris T.K. Quik,<sup>e</sup> J.A.J. Meesters,<sup>f</sup> Iseult Lynch,<sup>b, g</sup> Dario Greco,<sup>h, i</sup> Antreas Afantitis<sup>a, b, c, j, \*</sup>

5

6 <sup>a</sup> NovaMechanics Ltd., Nicosia 1070, Cyprus

7 <sup>b</sup> Entelos Institute, Nicosia 2102, Cyprus

8 <sup>c</sup> NovaMechanics MIKE, Piraeus 18545, Greece

9 <sup>d</sup> Division of Physical Sciences and Applications, Hellenic Military Academy, Vari 16672, Greece

10 <sup>e</sup> National Institute for Public Health and the Environment (RIVM), Center for Sustainability,  
11 Environment and Health (DMG), Antonie van Leeuwenhoeklaan 9, 3721 MA Bilthoven, the Netherlands

12 <sup>f</sup> National Institute for Public Health and Environment (RIVM), Centre for Safety of Substances and  
13 Products, Antonie van Leeuwenhoeklaan 9, 3721 MA Bilthoven, the Netherlands

14 <sup>g</sup> School of Geography, Earth and Environmental Sciences, University of Birmingham, Birmingham B15  
15 2TT, United Kingdom

16 <sup>h</sup> Finnish Hub for Development and Validation of Integrated Approaches (FHAIIVE), Faculty of Medicine  
17 and Health Technology, Tampere University, Tampere 33100, Finland

18 <sup>i</sup> Division of Pharmaceutical Biosciences, Faculty of Pharmacy, University of Helsinki, Helsinki 00790,  
19 Finland

20 <sup>j</sup> Department of Pharmacy, Frederick University, Nicosia 1036, Cyprus

21

22 **S1. Comparison of steady-state mass and concentration calculations using SimpleBox4nano (v4.01-**  
 23 **nano) in Excel and the *SimpleBox4nano* web application**

24

25 **Table S1. Comparison of steady-state mass and concentration calculations for nZnO, using SimpleBox4nano (v4.01-nano)**  
 26 **in Excel and the *SimpleBox4nano* web application under default scenarios within the regional scale (all values are**  
 27 **rounded to one decimal point).**

| nZnO                                                        |                                         |                |                |                |                        |
|-------------------------------------------------------------|-----------------------------------------|----------------|----------------|----------------|------------------------|
| Receiving<br>Compartment                                    | SimpleBox4nano (v4.01-nano)<br>in Excel |                | SimpleBox4nano |                | Concentration<br>Units |
|                                                             | Masses (kg)                             | Concentrations | Masses (kg)    | Concentrations |                        |
| <b>Air</b>                                                  | 5.6E+04                                 | 2.5E-07        | 5.6E+04        | 2.5E-07        | g.m <sup>-3</sup>      |
| Dissolved/Gas<br>species (G/D)                              | 2.0E+04                                 | 8.6E-08        | 2.0E+04        | 8.6E-08        | g.m <sup>-3</sup>      |
| * GAS PHASE                                                 | 8.4E-09                                 | 3.7E-20        | 8.4E-09        | 3.7E-20        | g.m <sup>-3</sup>      |
| * AEROSOL- and<br>CLOUD PHASES                              | 2.0E+04                                 | 8.6E-08        | 2.0E+04        | 8.6E-08        | g.m <sup>-3</sup>      |
| Solid species (S)                                           | 7.1E+03                                 | 3.1E-08        | 7.1E+03        | 3.1E-08        | g.m <sup>-3</sup>      |
| Species attached to<br>NCs (<450 nm) (A)                    | 3.0E+04                                 | 1.3E-07        | 3.0E+04        | 1.3E-07        | g.m <sup>-3</sup>      |
| Species attached to<br>suspended particles<br>(>450 nm) (P) | 2.0E-01                                 | 8.9E-13        | 2.0E-01        | 8.9E-13        | g.m <sup>-3</sup>      |
|                                                             |                                         |                |                |                |                        |
| <b>Fresh water lake</b>                                     | 1.8E+04                                 | 3.1E-07        | 1.8E+04        | 3.1E-07        | g.L <sup>-1</sup>      |
| Dissolved/Gas<br>species (G/D)                              | 1.8E+04                                 | 3.1E-07        | 1.8E+04        | 3.1E-07        | g.L <sup>-1</sup>      |
| * DISSOLVED                                                 | 1.8E+04                                 | 3.1E-07        | 1.8E+04        | 3.1E-07        | g.L <sup>-1</sup>      |
| * SUSPENDED<br>SOLIDS                                       | 4.8E+00                                 | 3.1E-05        | 4.8E+00        | 3.1E-05        | g.kg(d) <sup>-1</sup>  |
| Solid species (S)                                           | 7.1E-02                                 | 1.2E-12        | 7.1E-02        | 1.2E-12        | g.L <sup>-1</sup>      |
| Species attached to<br>NCs (<450 nm) (A)                    | 5.5E+01                                 | 9.7E-10        | 5.5E+01        | 9.7E-10        | g.L <sup>-1</sup>      |
| Species attached to<br>suspended particles<br>(>450 nm) (P) | 2.7E-02                                 | 4.7E-13        | 2.7E-02        | 4.7E-13        | g.L <sup>-1</sup>      |
|                                                             |                                         |                |                |                |                        |
| <b>Fresh water lake<br/>sediment</b>                        | 5.1E+02                                 | 2.3E-05        | 5.1E+02        | 2.3E-05        | g.kg(w) <sup>-1</sup>  |
| Dissolved/Gas<br>species (G/D)                              | 5.1E+02                                 | 2.3E-05        | 5.1E+02        | 2.3E-05        | g.kg(w) <sup>-1</sup>  |
| * PORE WATER                                                | 4.1E+02                                 | 1.1E-03        | 4.1E+02        | 1.1E-03        | g.L <sup>-1</sup>      |
| * SOLID PHASE                                               | 1.0E+02                                 | 5.7E-02        | 1.0E+02        | 5.7E-02        | g.kg(d) <sup>-1</sup>  |
| Solid species (S)                                           | 1.5E-07                                 | 6.6E-15        | 1.5E-07        | 6.6E-15        | g.kg(w) <sup>-1</sup>  |
| Species attached to<br>NCs (<450 nm) (A)                    | 4.1E-02                                 | 1.8E-09        | 4.1E-02        | 1.8E-09        | g.kg(w) <sup>-1</sup>  |
| Species attached to<br>suspended particles<br>(>450 nm) (P) | 7.8E-03                                 | 3.5E-10        | 7.8E-03        | 3.5E-10        | g.kg(w) <sup>-1</sup>  |
|                                                             |                                         |                |                |                |                        |
| <b>Fresh water</b>                                          | 1.9E+07                                 | 1.0E-03        | 1.9E+07        | 1.0E-03        | g.L <sup>-1</sup>      |
| Dissolved/Gas<br>species (G/D)                              | 1.9E+07                                 | 1.0E-03        | 1.9E+07        | 1.0E-03        | g.L <sup>-1</sup>      |

|                                                       |         |         |         |         |                       |
|-------------------------------------------------------|---------|---------|---------|---------|-----------------------|
| * DISSOLVED                                           | 1.9E+07 | 1.0E-03 | 1.9E+07 | 1.0E-03 | g.L <sup>-1</sup>     |
| * SUSPENDED SOLIDS                                    | 3.3E+04 | 1.0E-01 | 3.3E+04 | 1.0E-01 | g.kg(d) <sup>-1</sup> |
| Solid species (S)                                     | 8.8E+02 | 4.7E-08 | 8.8E+02 | 4.7E-08 | g.L <sup>-1</sup>     |
| Species attached to NCs (<450 nm) (A)                 | 1.5E+05 | 8.2E-06 | 1.5E+05 | 8.2E-06 | g.L <sup>-1</sup>     |
| Species attached to suspended particles (>450 nm) (P) | 5.2E+03 | 2.8E-07 | 5.2E+03 | 2.8E-07 | g.L <sup>-1</sup>     |
|                                                       |         |         |         |         |                       |
| <b>Fresh water sediment</b>                           | 8.5E+06 | 3.5E-02 | 8.5E+06 | 3.5E-02 | g.kg(w) <sup>-1</sup> |
| Dissolved/Gas species (G/D)                           | 8.4E+06 | 3.4E-02 | 8.4E+06 | 3.4E-02 | g.kg(w) <sup>-1</sup> |
| * PORE WATER                                          | 6.7E+06 | 1.7E+00 | 6.7E+06 | 1.7E+00 | g.L <sup>-1</sup>     |
| * SOLID PHASE                                         | 1.7E+06 | 8.7E+01 | 1.7E+06 | 8.7E+01 | g.kg(d) <sup>-1</sup> |
| Solid species (S)                                     | 6.1E-02 | 2.5E-10 | 6.1E-02 | 2.5E-10 | g.kg(w) <sup>-1</sup> |
| Species attached to NCs (<450 nm) (A)                 | 3.7E+03 | 1.5E-05 | 3.7E+03 | 1.5E-05 | g.kg(w) <sup>-1</sup> |
| Species attached to suspended particles (>450 nm) (P) | 5.0E+04 | 2.0E-04 | 5.0E+04 | 2.0E-04 | g.kg(w) <sup>-1</sup> |
|                                                       |         |         |         |         |                       |
| <b>Surface sea/ocean water</b>                        | 5.4E+06 | 5.4E-04 | 5.4E+06 | 5.4E-04 | g.L <sup>-1</sup>     |
| Dissolved/Gas species (G/D)                           | 5.4E+06 | 5.4E-04 | 5.4E+06 | 5.4E-04 | g.L <sup>-1</sup>     |
| * DISSOLVED                                           | 5.4E+06 | 5.4E-04 | 5.4E+06 | 5.4E-04 | g.L <sup>-1</sup>     |
| * SUSPENDED SOLIDS                                    | 3.9E+03 | 5.4E-02 | 3.9E+03 | 5.4E-02 | g.kg(d) <sup>-1</sup> |
| Solid species (S)                                     | 2.1E-01 | 2.1E-11 | 2.1E-01 | 2.1E-11 | g.L <sup>-1</sup>     |
| Species attached to NCs (<450 nm) (A)                 | 3.8E+03 | 3.8E-07 | 3.8E+03 | 3.8E-07 | g.L <sup>-1</sup>     |
| Species attached to suspended particles (>450 nm) (P) | 6.5E+01 | 6.5E-09 | 6.5E+01 | 6.5E-09 | g.L <sup>-1</sup>     |
|                                                       |         |         |         |         |                       |
| <b>Marine sediment</b>                                | 5.9E+05 | 1.5E-02 | 5.9E+05 | 1.5E-02 | g.kg(w) <sup>-1</sup> |
| Dissolved/Gas species (G/D)                           | 5.9E+05 | 1.5E-02 | 5.9E+05 | 1.5E-02 | g.kg(w) <sup>-1</sup> |
| * PORE WATER                                          | 4.7E+05 | 7.6E-04 | 4.7E+05 | 7.6E-04 | g.L <sup>-1</sup>     |
| * SOLID PHASE                                         | 1.2E+05 | 3.8E-02 | 1.2E+05 | 3.8E-02 | g.kg(d) <sup>-1</sup> |
| Solid species (S)                                     | 8.7E-07 | 2.2E-14 | 8.7E-07 | 2.2E-14 | g.kg(w) <sup>-1</sup> |
| Species attached to NCs (<450 nm) (A)                 | 2.8E+01 | 7.1E-07 | 2.8E+01 | 7.1E-07 | g.kg(w) <sup>-1</sup> |
| Species attached to suspended particles (>450 nm) (P) | 1.9E+02 | 4.8E-06 | 1.9E+02 | 4.8E-06 | g.kg(w) <sup>-1</sup> |
|                                                       |         |         |         |         |                       |
| <b>Natural soil</b>                                   | 8.6E+06 | 1.6E-03 | 8.6E+06 | 1.6E-03 | g.kg(w) <sup>-1</sup> |
| Dissolved/Gas species (G/D)                           | 8.6E+06 | 1.6E-03 | 8.6E+06 | 1.6E-03 | g.kg(w) <sup>-1</sup> |
| * PORE WATER                                          | 5.7E+04 | 9.2E-05 | 5.7E+04 | 9.2E-05 | g.L <sup>-1</sup>     |
| * SOLID PHASE                                         | 8.5E+06 | 1.8E-03 | 8.5E+06 | 1.8E-03 | g.kg(d) <sup>-1</sup> |

|                                                       |         |         |         |         |                       |
|-------------------------------------------------------|---------|---------|---------|---------|-----------------------|
| Solid species (S)                                     | 7.6E-02 | 1.5E-11 | 7.6E-02 | 1.5E-11 | g.kg(w) <sup>-1</sup> |
| Species attached to NCs (<450 nm) (A)                 | 3.6E+03 | 6.8E-07 | 3.6E+03 | 6.8E-07 | g.kg(w) <sup>-1</sup> |
| Species attached to suspended particles (>450 nm) (P) | 4.1E+02 | 7.8E-08 | 4.1E+02 | 7.8E-08 | g.kg(w) <sup>-1</sup> |
|                                                       |         |         |         |         |                       |
| <b>Agricultural soil</b>                              | 3.3E+08 | 7.1E-03 | 3.3E+08 | 7.1E-03 | g.kg(w) <sup>-1</sup> |
| Dissolved/Gas species (G/D)                           | 3.3E+08 | 7.1E-03 | 3.3E+08 | 7.1E-03 | g.kg(w) <sup>-1</sup> |
| * PORE WATER                                          | 2.2E+06 | 4.0E-04 | 2.2E+06 | 4.0E-04 | g.L <sup>-1</sup>     |
| * SOLID PHASE                                         | 3.3E+08 | 8.0E-03 | 3.3E+08 | 8.0E-03 | g.kg(d) <sup>-1</sup> |
| Solid species (S)                                     | 2.7E+01 | 5.9E-10 | 2.7E+01 | 5.9E-10 | g.kg(w) <sup>-1</sup> |
| Species attached to NCs (<450 nm) (A)                 | 1.7E+05 | 3.6E-06 | 1.7E+05 | 3.6E-06 | g.kg(w) <sup>-1</sup> |
| Species attached to suspended particles (>450 nm) (P) | 1.5E+05 | 3.2E-06 | 1.5E+05 | 3.2E-06 | g.kg(w) <sup>-1</sup> |
|                                                       |         |         |         |         |                       |
| <b>Other soil</b>                                     | 3.2E+06 | 1.6E-03 | 3.2E+06 | 1.6E-03 | g.kg(w) <sup>-1</sup> |
| Dissolved/Gas species (G/D)                           | 3.2E+06 | 1.6E-03 | 3.2E+06 | 1.6E-03 | g.kg(w) <sup>-1</sup> |
| * PORE WATER                                          | 2.1E+04 | 9.2E-05 | 2.1E+04 | 9.2E-05 | g.L <sup>-1</sup>     |
| * SOLID PHASE                                         | 3.2E+06 | 1.8E-03 | 3.2E+06 | 1.8E-03 | g.kg(d) <sup>-1</sup> |
| Solid species (S)                                     | 2.8E-02 | 1.5E-11 | 2.8E-02 | 1.5E-11 | g.kg(w) <sup>-1</sup> |
| Species attached to NCs (<450 nm) (A)                 | 1.3E+03 | 6.8E-07 | 1.3E+03 | 6.8E-07 | g.kg(w) <sup>-1</sup> |
| Species attached to suspended particles (>450 nm) (P) | 1.5E+02 | 7.8E-08 | 1.5E+02 | 7.8E-08 | g.kg(w) <sup>-1</sup> |
|                                                       |         |         |         |         |                       |
| Total D                                               | 3.8E+08 | 1.6E-06 | 3.8E+08 | 1.6E-06 | g.L <sup>-1</sup>     |
| Total S                                               | 8.0E+03 | 3.5E-11 | 8.0E+03 | 3.5E-11 | g.L <sup>-1</sup>     |
| Total A                                               | 3.6E+05 | 1.6E-09 | 3.6E+05 | 1.6E-09 | g.L <sup>-1</sup>     |
| Total P                                               | 2.0E+05 | 8.8E-10 | 2.0E+05 | 8.8E-10 | g.L <sup>-1</sup>     |
| <b>Total</b>                                          | 3.8E+08 | 1.6E-06 | 3.8E+08 | 1.6E-06 | g.L <sup>-1</sup>     |

28

29

30 Table S2. Comparison of steady-state mass and concentration calculations for nZnO, using SimpleBox4nano (v4.01-nano)  
 31 in Excel and the SimpleBox4nano web application under default scenarios within the continental scale (all values are  
 32 rounded to one decimal point).

| nZnO                                                        |                                         |                |                |                |                        |
|-------------------------------------------------------------|-----------------------------------------|----------------|----------------|----------------|------------------------|
| Receiving<br>Compartment                                    | SimpleBox4nano (v4.01-nano)<br>in Excel |                | SimpleBox4nano |                | Concentration<br>Units |
|                                                             | Masses (kg)                             | Concentrations | Masses (kg)    | Concentrations |                        |
| <b>Air</b>                                                  | 1.7E+05                                 | 2.3E-08        | 1.7E+05        | 2.3E-08        | g.m <sup>-3</sup>      |
| Dissolved/Gas<br>species (G/D)                              | 2.0E+04                                 | 2.7E-09        | 2.0E+04        | 2.7E-09        | g.m <sup>-3</sup>      |
| * GAS PHASE                                                 | 8.4E-09                                 | 1.2E-21        | 8.4E-09        | 1.2E-21        | g.m <sup>-3</sup>      |
| * AEROSOL- and<br>CLOUD PHASES                              | 2.0E+04                                 | 2.7E-09        | 2.0E+04        | 2.7E-09        | g.m <sup>-3</sup>      |
| Solid species (S)                                           | 1.8E+03                                 | 2.5E-10        | 1.8E+03        | 2.5E-10        | g.m <sup>-3</sup>      |
| Species attached to<br>NCs (<450 nm) (A)                    | 1.5E+05                                 | 2.0E-08        | 1.5E+05        | 2.0E-08        | g.m <sup>-3</sup>      |
| Species attached to<br>suspended particles<br>(>450 nm) (P) | 8.1E-02                                 | 1.1E-14        | 8.1E-02        | 1.1E-14        | g.m <sup>-3</sup>      |
|                                                             |                                         |                |                |                |                        |
| <b>Fresh water lake</b>                                     | 1.6E+05                                 | 1.7E-07        | 1.6E+05        | 1.7E-07        | g.L <sup>-1</sup>      |
| Dissolved/Gas<br>species (G/D)                              | 1.6E+05                                 | 1.7E-07        | 1.6E+05        | 1.7E-07        | g.L <sup>-1</sup>      |
| * DISSOLVED                                                 | 1.6E+05                                 | 1.7E-07        | 1.6E+05        | 1.7E-07        | g.L <sup>-1</sup>      |
| * SUSPENDED<br>SOLIDS                                       | 4.3E+01                                 | 1.7E-05        | 4.3E+01        | 1.7E-05        | g.kg(d) <sup>-1</sup>  |
| Solid species (S)                                           | 9.2E-03                                 | 1.0E-14        | 9.2E-03        | 1.0E-14        | g.L <sup>-1</sup>      |
| Species attached to<br>NCs (<450 nm) (A)                    | 1.2E+02                                 | 1.3E-10        | 1.2E+02        | 1.3E-10        | g.L <sup>-1</sup>      |
| Species attached to<br>suspended particles<br>(>450 nm) (P) | 4.2E-03                                 | 4.6E-15        | 4.2E-03        | 4.6E-15        | g.L <sup>-1</sup>      |
|                                                             |                                         |                |                |                |                        |
| <b>Fresh water lake<br/>sediment</b>                        | 4.3E+03                                 | 1.2E-05        | 4.3E+03        | 1.2E-05        | g.kg(w) <sup>-1</sup>  |
| Dissolved/Gas<br>species (G/D)                              | 4.3E+03                                 | 1.2E-05        | 4.3E+03        | 1.2E-05        | g.kg(w) <sup>-1</sup>  |
| * PORE WATER                                                | 3.5E+03                                 | 6.0E-04        | 3.5E+03        | 6.0E-04        | g.L <sup>-1</sup>      |
| * SOLID PHASE                                               | 8.7E+02                                 | 3.0E-02        | 8.7E+02        | 3.0E-02        | g.kg(d) <sup>-1</sup>  |
| Solid species (S)                                           | 2.1E-09                                 | 5.9E-18        | 2.1E-09        | 5.9E-18        | g.kg(w) <sup>-1</sup>  |
| Species attached to<br>NCs (<450 nm) (A)                    | 8.7E-02                                 | 2.4E-10        | 8.7E-02        | 2.4E-10        | g.kg(w) <sup>-1</sup>  |
| Species attached to<br>suspended particles<br>(>450 nm) (P) | 1.3E-03                                 | 3.5E-12        | 1.3E-03        | 3.5E-12        | g.kg(w) <sup>-1</sup>  |
|                                                             |                                         |                |                |                |                        |
| <b>Fresh water</b>                                          | 1.6E+06                                 | 5.1E-06        | 1.6E+06        | 5.1E-06        | g.L <sup>-1</sup>      |
| Dissolved/Gas<br>species (G/D)                              | 1.6E+06                                 | 5.1E-06        | 1.6E+06        | 5.1E-06        | g.L <sup>-1</sup>      |
| * DISSOLVED                                                 | 1.6E+06                                 | 5.1E-06        | 1.6E+06        | 5.1E-06        | g.L <sup>-1</sup>      |
| * SUSPENDED<br>SOLIDS                                       | 2.7E+03                                 | 5.1E-04        | 2.7E+03        | 5.1E-04        | g.kg(d) <sup>-1</sup>  |
| Solid species (S)                                           | 7.4E-02                                 | 2.4E-13        | 7.4E-02        | 2.4E-13        | g.L <sup>-1</sup>      |
| Species attached to                                         | 2.9E+03                                 | 9.3E-09        | 2.9E+03        | 9.3E-09        | g.L <sup>-1</sup>      |

|                                                       |         |         |         |         |                       |
|-------------------------------------------------------|---------|---------|---------|---------|-----------------------|
| NCs (<450 nm) (A)                                     |         |         |         |         |                       |
| Species attached to suspended particles (>450 nm) (P) | 4.4E-01 | 1.4E-12 | 4.4E-01 | 1.4E-12 | g.L <sup>-1</sup>     |
|                                                       |         |         |         |         |                       |
| <b>Fresh water sediment</b>                           | 6.2E+05 | 1.6E-04 | 6.2E+05 | 1.6E-04 | g.kg(w) <sup>-1</sup> |
| Dissolved/Gas species (G/D)                           | 6.2E+05 | 1.6E-04 | 6.2E+05 | 1.6E-04 | g.kg(w) <sup>-1</sup> |
| * PORE WATER                                          | 5.0E+05 | 7.9E-03 | 5.0E+05 | 7.9E-03 | g.L <sup>-1</sup>     |
| * SOLID PHASE                                         | 1.2E+05 | 3.9E-01 | 1.2E+05 | 3.9E-01 | g.kg(d) <sup>-1</sup> |
| Solid species (S)                                     | 5.7E-07 | 1.4E-16 | 5.7E-07 | 1.4E-16 | g.kg(w) <sup>-1</sup> |
| Species attached to NCs (<450 nm) (A)                 | 6.9E+01 | 1.7E-08 | 6.9E+01 | 1.7E-08 | g.kg(w) <sup>-1</sup> |
| Species attached to suspended particles (>450 nm) (P) | 4.2E+00 | 1.1E-09 | 4.2E+00 | 1.1E-09 | g.kg(w) <sup>-1</sup> |
|                                                       |         |         |         |         |                       |
| <b>Surface sea/ocean water</b>                        | 3.4E+11 | 4.9E-04 | 3.4E+11 | 4.9E-04 | g.L <sup>-1</sup>     |
| Dissolved/Gas species (G/D)                           | 3.4E+11 | 4.9E-04 | 3.4E+11 | 4.9E-04 | g.L <sup>-1</sup>     |
| * DISSOLVED                                           | 3.4E+11 | 4.9E-04 | 3.4E+11 | 4.9E-04 | g.L <sup>-1</sup>     |
| * SUSPENDED SOLIDS                                    | 2.5E+08 | 4.9E-02 | 2.5E+08 | 4.9E-02 | g.kg(d) <sup>-1</sup> |
| Solid species (S)                                     | 1.9E+00 | 2.8E-15 | 1.9E+00 | 2.8E-15 | g.L <sup>-1</sup>     |
| Species attached to NCs (<450 nm) (A)                 | 4.5E+04 | 6.5E-11 | 4.5E+04 | 6.5E-11 | g.L <sup>-1</sup>     |
| Species attached to suspended particles (>450 nm) (P) | 7.5E+01 | 1.1E-13 | 7.5E+01 | 1.1E-13 | g.L <sup>-1</sup>     |
|                                                       |         |         |         |         |                       |
| <b>Marine sediment</b>                                | 1.8E+09 | 1.3E-02 | 1.8E+09 | 1.3E-02 | g.kg(w) <sup>-1</sup> |
| Dissolved/Gas species (G/D)                           | 1.8E+09 | 1.3E-02 | 1.8E+09 | 1.3E-02 | g.kg(w) <sup>-1</sup> |
| * PORE WATER                                          | 1.5E+09 | 6.8E-04 | 1.5E+09 | 6.8E-04 | g.L <sup>-1</sup>     |
| * SOLID PHASE                                         | 3.7E+08 | 3.4E-02 | 3.7E+08 | 3.4E-02 | g.kg(d) <sup>-1</sup> |
| Solid species (S)                                     | 9.6E-08 | 7.1E-19 | 9.6E-08 | 7.1E-19 | g.kg(w) <sup>-1</sup> |
| Species attached to NCs (<450 nm) (A)                 | 1.7E+01 | 1.2E-10 | 1.7E+01 | 1.2E-10 | g.kg(w) <sup>-1</sup> |
| Species attached to suspended particles (>450 nm) (P) | 1.1E+01 | 8.1E-11 | 1.1E+01 | 8.1E-11 | g.kg(w) <sup>-1</sup> |
|                                                       |         |         |         |         |                       |
| <b>Natural soil</b>                                   | 6.3E+06 | 7.4E-05 | 6.3E+06 | 7.4E-05 | g.kg(w) <sup>-1</sup> |
| Dissolved/Gas species (G/D)                           | 6.3E+06 | 7.4E-05 | 6.3E+06 | 7.4E-05 | g.kg(w) <sup>-1</sup> |
| * PORE WATER                                          | 4.2E+04 | 4.2E-06 | 4.2E+04 | 4.2E-06 | g.L <sup>-1</sup>     |
| * SOLID PHASE                                         | 6.3E+06 | 8.3E-05 | 6.3E+06 | 8.3E-05 | g.kg(d) <sup>-1</sup> |
| Solid species (S)                                     | 1.0E-02 | 1.2E-13 | 1.0E-02 | 1.2E-13 | g.kg(w) <sup>-1</sup> |
| Species attached to NCs (<450 nm) (A)                 | 8.2E+03 | 9.7E-08 | 8.2E+03 | 9.7E-08 | g.kg(w) <sup>-1</sup> |
| Species attached to suspended particles               | 5.4E+01 | 6.3E-10 | 5.4E+01 | 6.3E-10 | g.kg(w) <sup>-1</sup> |

|                                                       |         |         |         |         |                       |
|-------------------------------------------------------|---------|---------|---------|---------|-----------------------|
| (>450 nm) (P)                                         |         |         |         |         |                       |
| <b>Agricultural soil</b>                              | 3.1E+07 | 4.1E-05 | 3.1E+07 | 4.1E-05 | g.kg(w) <sup>-1</sup> |
| Dissolved/Gas species (G/D)                           | 3.1E+07 | 4.1E-05 | 3.1E+07 | 4.1E-05 | g.kg(w) <sup>-1</sup> |
| * PORE WATER                                          | 2.1E+05 | 2.3E-06 | 2.1E+05 | 2.3E-06 | g.L <sup>-1</sup>     |
| * SOLID PHASE                                         | 3.1E+07 | 4.7E-05 | 3.1E+07 | 4.7E-05 | g.kg(d) <sup>-1</sup> |
| Solid species (S)                                     | 2.2E-02 | 2.9E-14 | 2.2E-02 | 2.9E-14 | g.kg(w) <sup>-1</sup> |
| Species attached to NCs (<450 nm) (A)                 | 2.0E+04 | 2.6E-08 | 2.0E+04 | 2.6E-08 | g.kg(w) <sup>-1</sup> |
| Species attached to suspended particles (>450 nm) (P) | 1.2E+02 | 1.6E-10 | 1.2E+02 | 1.6E-10 | g.kg(w) <sup>-1</sup> |
| <b>Other soil</b>                                     | 2.3E+06 | 7.4E-05 | 2.3E+06 | 7.4E-05 | g.kg(w) <sup>-1</sup> |
| Dissolved/Gas species (G/D)                           | 2.3E+06 | 7.4E-05 | 2.3E+06 | 7.4E-05 | g.kg(w) <sup>-1</sup> |
| * PORE WATER                                          | 1.5E+04 | 4.2E-06 | 1.5E+04 | 4.2E-06 | g.L <sup>-1</sup>     |
| * SOLID PHASE                                         | 2.3E+06 | 8.3E-05 | 2.3E+06 | 8.3E-05 | g.kg(d) <sup>-1</sup> |
| Solid species (S)                                     | 3.7E-03 | 1.2E-13 | 3.7E-03 | 1.2E-13 | g.kg(w) <sup>-1</sup> |
| Species attached to NCs (<450 nm) (A)                 | 3.1E+03 | 9.7E-08 | 3.1E+03 | 9.7E-08 | g.kg(w) <sup>-1</sup> |
| Species attached to suspended particles (>450 nm) (P) | 2.0E+01 | 6.3E-10 | 2.0E+01 | 6.3E-10 | g.kg(w) <sup>-1</sup> |
| Total D                                               | 3.4E+11 | 4.4E-05 | 3.4E+11 | 4.4E-05 | g.L <sup>-1</sup>     |
| Total S                                               | 1.8E+03 | 2.3E-13 | 1.8E+03 | 2.3E-13 | g.L <sup>-1</sup>     |
| Total A                                               | 2.3E+05 | 2.9E-11 | 2.3E+05 | 2.9E-11 | g.L <sup>-1</sup>     |
| Total P                                               | 2.8E+02 | 3.6E-14 | 2.8E+02 | 3.6E-14 | g.L <sup>-1</sup>     |
| <b>Total</b>                                          | 3.4E+11 | 4.4E-05 | 3.4E+11 | 4.4E-05 | g.L <sup>-1</sup>     |

34 Table S3. Comparison of steady-state mass and concentration calculations for nZnO, using SimpleBox4nano (v4.01-nano)  
 35 in Excel and the SimpleBox4nano web application under default scenarios within the moderate zone (all values are  
 36 rounded to one decimal point).

| nZnO                                                        |                                         |                |                |                |                        |
|-------------------------------------------------------------|-----------------------------------------|----------------|----------------|----------------|------------------------|
| Receiving<br>Compartment                                    | SimpleBox4nano (v4.01-nano)<br>in Excel |                | SimpleBox4nano |                | Concentration<br>Units |
|                                                             | Masses (kg)                             | Concentrations | Masses (kg)    | Concentrations |                        |
| <b>Air</b>                                                  | 9.2E+04                                 | 1.2E-09        | 9.2E+04        | 1.2E-09        | g.m <sup>-3</sup>      |
| Dissolved/Gas<br>species (G/D)                              | 3.0E+03                                 | 3.9E-11        | 3.0E+03        | 3.9E-11        | g.m <sup>-3</sup>      |
| * GAS PHASE                                                 | 1.3E-09                                 | 1.7E-23        | 1.3E-09        | 1.7E-23        | g.m <sup>-3</sup>      |
| * AEROSOL- and<br>CLOUD PHASES                              | 3.0E+03                                 | 3.9E-11        | 3.0E+03        | 3.9E-11        | g.m <sup>-3</sup>      |
| Solid species (S)                                           | 6.6E+01                                 | 8.5E-13        | 6.6E+01        | 8.5E-13        | g.m <sup>-3</sup>      |
| Species attached to<br>NCs (<450 nm) (A)                    | 8.9E+04                                 | 1.1E-09        | 8.9E+04        | 1.1E-09        | g.m <sup>-3</sup>      |
| Species attached to<br>suspended particles<br>(>450 nm) (P) | 3.6E-03                                 | 4.6E-17        | 3.6E-03        | 4.6E-17        | g.m <sup>-3</sup>      |
|                                                             |                                         |                |                |                |                        |
| <b>Surface sea/ocean<br/>water</b>                          | 1.9E+12                                 | 4.9E-04        | 1.9E+12        | 4.9E-04        | g.L <sup>-1</sup>      |
| Dissolved/Gas<br>species (G/D)                              | 1.9E+12                                 | 4.9E-04        | 1.9E+12        | 4.9E-04        | g.L <sup>-1</sup>      |
| * DISSOLVED                                                 | 1.9E+12                                 | 4.9E-04        | 1.9E+12        | 4.9E-04        | g.L <sup>-1</sup>      |
| * SUSPENDED<br>SOLIDS                                       | 1.4E+09                                 | 4.9E-02        | 1.4E+09        | 4.9E-02        | g.kg(d) <sup>-1</sup>  |
| Solid species (S)                                           | 5.9E-02                                 | 1.5E-17        | 5.9E-02        | 1.5E-17        | g.L <sup>-1</sup>      |
| Species attached to<br>NCs (<450 nm) (A)                    | 4.0E+04                                 | 1.0E-11        | 4.0E+04        | 1.0E-11        | g.L <sup>-1</sup>      |
| Species attached to<br>suspended particles<br>(>450 nm) (P) | 1.7E+00                                 | 4.5E-16        | 1.7E+00        | 4.5E-16        | g.L <sup>-1</sup>      |
|                                                             |                                         |                |                |                |                        |
| <b>Deep sea/ocean<br/>water</b>                             | 5.7E+13                                 | 4.9E-04        | 5.7E+13        | 4.9E-04        | g.L <sup>-1</sup>      |
| Dissolved/Gas<br>species (G/D)                              | 5.7E+13                                 | 4.9E-04        | 5.7E+13        | 4.9E-04        | g.L <sup>-1</sup>      |
| * DISSOLVED                                                 | 5.7E+13                                 | 4.9E-04        | 5.7E+13        | 4.9E-04        | g.L <sup>-1</sup>      |
| * SUSPENDED<br>SOLIDS                                       | 4.1E+10                                 | 4.9E-02        | 4.1E+10        | 4.9E-02        | g.kg(d) <sup>-1</sup>  |
| Solid species (S)                                           | 1.7E-05                                 | 1.4E-22        | 1.7E-05        | 1.4E-22        | g.L <sup>-1</sup>      |
| Species attached to<br>NCs (<450 nm) (A)                    | 6.0E+03                                 | 5.2E-14        | 6.0E+03        | 5.2E-14        | g.L <sup>-1</sup>      |
| Species attached to<br>suspended particles<br>(>450 nm) (P) | 5.6E-01                                 | 4.8E-18        | 5.6E-01        | 4.8E-18        | g.L <sup>-1</sup>      |
|                                                             |                                         |                |                |                |                        |
| <b>Marine sediment</b>                                      | 2.0E+10                                 | 1.3E-02        | 2.0E+10        | 1.3E-02        | g.kg(w) <sup>-1</sup>  |
| Dissolved/Gas<br>species (G/D)                              | 2.0E+10                                 | 1.3E-02        | 2.0E+10        | 1.3E-02        | g.kg(w) <sup>-1</sup>  |
| * PORE WATER                                                | 1.6E+10                                 | 6.8E-04        | 1.6E+10        | 6.8E-04        | g.L <sup>-1</sup>      |
| * SOLID PHASE                                               | 4.1E+09                                 | 3.4E-02        | 4.1E+09        | 3.4E-02        | g.kg(d) <sup>-1</sup>  |
| Solid species (S)                                           | 5.6E-14                                 | 3.7E-26        | 5.6E-14        | 3.7E-26        | g.kg(w) <sup>-1</sup>  |

|                                                       |         |         |         |         |                       |
|-------------------------------------------------------|---------|---------|---------|---------|-----------------------|
| Species attached to NCs (<450 nm) (A)                 | 1.5E-01 | 9.7E-14 | 1.5E-01 | 9.7E-14 | g.kg(w) <sup>-1</sup> |
| Species attached to suspended particles (>450 nm) (P) | 5.5E-03 | 3.6E-15 | 5.5E-03 | 3.6E-15 | g.kg(w) <sup>-1</sup> |
|                                                       |         |         |         |         |                       |
| <b>Other soil</b>                                     | 1.3E+07 | 4.0E-06 | 1.3E+07 | 4.0E-06 | g.kg(w) <sup>-1</sup> |
| Dissolved/Gas species (G/D)                           | 1.3E+07 | 4.0E-06 | 1.3E+07 | 4.0E-06 | g.kg(w) <sup>-1</sup> |
| * PORE WATER                                          | 8.7E+04 | 2.2E-07 | 8.7E+04 | 2.2E-07 | g.L <sup>-1</sup>     |
| * SOLID PHASE                                         | 1.3E+07 | 4.5E-06 | 1.3E+07 | 4.5E-06 | g.kg(d) <sup>-1</sup> |
| Solid species (S)                                     | 3.6E-03 | 1.1E-15 | 3.6E-03 | 1.1E-15 | g.kg(w) <sup>-1</sup> |
| Species attached to NCs (<450 nm) (A)                 | 5.0E+04 | 1.5E-08 | 5.0E+04 | 1.5E-08 | g.kg(w) <sup>-1</sup> |
| Species attached to suspended particles (>450 nm) (P) | 2.0E+01 | 5.9E-12 | 2.0E+01 | 5.9E-12 | g.kg(w) <sup>-1</sup> |
|                                                       |         |         |         |         |                       |
| Total D                                               | 5.9E+13 | 3.0E-04 | 5.9E+13 | 3.0E-04 | g.L <sup>-1</sup>     |
| Total S                                               | 6.6E+01 | 3.3E-16 | 6.6E+01 | 3.3E-16 | g.L <sup>-1</sup>     |
| Total A                                               | 1.8E+05 | 9.3E-13 | 1.8E+05 | 9.3E-13 | g.L <sup>-1</sup>     |
| Total P                                               | 2.2E+01 | 1.1E-16 | 2.2E+01 | 1.1E-16 | g.L <sup>-1</sup>     |
| <b>Total</b>                                          | 5.9E+13 | 3.0E-04 | 5.9E+13 | 3.0E-04 | g.L <sup>-1</sup>     |

37

38 Table S4. Comparison of steady-state mass and concentration calculations for nZnO, using SimpleBox4nano (v4.01-nano)  
 39 in Excel and the SimpleBox4nano web application under default scenarios within the arctic zone (all values are rounded  
 40 to one decimal point).

| nZnO                                                        |                                         |                |                |                |                        |
|-------------------------------------------------------------|-----------------------------------------|----------------|----------------|----------------|------------------------|
| Receiving<br>Compartment                                    | SimpleBox4Nano (v4.01-nano)<br>in Excel |                | SimpleBox4Nano |                | Concentration<br>Units |
|                                                             | Masses (kg)                             | Concentrations | Masses (kg)    | Concentrations |                        |
| <b>Air</b>                                                  | 1.9E+04                                 | 4.5E-10        | 1.9E+04        | 4.5E-10        | g.m <sup>-3</sup>      |
| Dissolved/Gas<br>species (G/D)                              | 1.3E+02                                 | 3.1E-12        | 1.3E+02        | 3.1E-12        | g.m <sup>-3</sup>      |
| * GAS PHASE                                                 | 5.6E-11                                 | 1.3E-24        | 5.6E-11        | 1.3E-24        | g.m <sup>-3</sup>      |
| * AEROSOL- and<br>CLOUD PHASES                              | 1.3E+02                                 | 3.1E-12        | 1.3E+02        | 3.1E-12        | g.m <sup>-3</sup>      |
| Solid species (S)                                           | 7.3E-01                                 | 1.7E-14        | 7.3E-01        | 1.7E-14        | g.m <sup>-3</sup>      |
| Species attached to<br>NCs (<450 nm) (A)                    | 1.9E+04                                 | 4.5E-10        | 1.9E+04        | 4.5E-10        | g.m <sup>-3</sup>      |
| Species attached to<br>suspended particles<br>(>450 nm) (P) | 1.1E-04                                 | 2.5E-18        | 1.1E-04        | 2.5E-18        | g.m <sup>-3</sup>      |
|                                                             |                                         |                |                |                |                        |
| <b>Surface sea/ocean<br/>water</b>                          | 1.5E+12                                 | 6.0E-04        | 1.5E+12        | 6.0E-04        | g.L <sup>-1</sup>      |
| Dissolved/Gas<br>species (G/D)                              | 1.5E+12                                 | 6.0E-04        | 1.5E+12        | 6.0E-04        | g.L <sup>-1</sup>      |
| * DISSOLVED                                                 | 1.5E+12                                 | 6.0E-04        | 1.5E+12        | 6.0E-04        | g.L <sup>-1</sup>      |
| * SUSPENDED<br>SOLIDS                                       | 1.1E+09                                 | 6.0E-02        | 1.1E+09        | 6.0E-02        | g.kg(d) <sup>-1</sup>  |
| Solid species (S)                                           | 6.6E-04                                 | 2.6E-19        | 6.6E-04        | 2.6E-19        | g.L <sup>-1</sup>      |
| Species attached to<br>NCs (<450 nm) (A)                    | 8.2E+03                                 | 3.2E-12        | 8.2E+03        | 3.2E-12        | g.L <sup>-1</sup>      |
| Species attached to<br>suspended particles<br>(>450 nm) (P) | 3.8E-02                                 | 1.5E-17        | 3.8E-02        | 1.5E-17        | g.L <sup>-1</sup>      |
|                                                             |                                         |                |                |                |                        |
| <b>Deep sea/ocean<br/>water</b>                             | 3.8E+13                                 | 4.9E-04        | 3.8E+13        | 4.9E-04        | g.L <sup>-1</sup>      |
| Dissolved/Gas<br>species (G/D)                              | 3.8E+13                                 | 4.9E-04        | 3.8E+13        | 4.9E-04        | g.L <sup>-1</sup>      |
| * DISSOLVED                                                 | 3.8E+13                                 | 4.9E-04        | 3.8E+13        | 4.9E-04        | g.L <sup>-1</sup>      |
| * SUSPENDED<br>SOLIDS                                       | 2.7E+10                                 | 4.9E-02        | 2.7E+10        | 4.9E-02        | g.kg(d) <sup>-1</sup>  |
| Solid species (S)                                           | 2.2E-07                                 | 2.9E-24        | 2.2E-07        | 2.9E-24        | g.L <sup>-1</sup>      |
| Species attached to<br>NCs (<450 nm) (A)                    | 1.3E+03                                 | 1.7E-14        | 1.3E+03        | 1.7E-14        | g.L <sup>-1</sup>      |
| Species attached to<br>suspended particles<br>(>450 nm) (P) | 1.3E-02                                 | 1.7E-19        | 1.3E-02        | 1.7E-19        | g.L <sup>-1</sup>      |
|                                                             |                                         |                |                |                |                        |
| <b>Marine sediment</b>                                      | 1.3E+10                                 | 1.3E-02        | 1.3E+10        | 1.3E-02        | g.kg(w) <sup>-1</sup>  |
| Dissolved/Gas<br>species (G/D)                              | 1.3E+10                                 | 1.3E-02        | 1.3E+10        | 1.3E-02        | g.kg(w) <sup>-1</sup>  |
| * PORE WATER                                                | 1.1E+10                                 | 6.8E-04        | 1.1E+10        | 6.8E-04        | g.L <sup>-1</sup>      |
| * SOLID PHASE                                               | 2.7E+09                                 | 3.4E-02        | 2.7E+09        | 3.4E-02        | g.kg(d) <sup>-1</sup>  |
| Solid species (S)                                           | 7.4E-16                                 | 7.4E-28        | 7.4E-16        | 7.4E-28        | g.kg(w) <sup>-1</sup>  |

|                                                       |         |         |         |         |                       |
|-------------------------------------------------------|---------|---------|---------|---------|-----------------------|
| Species attached to NCs (<450 nm) (A)                 | 3.3E-02 | 3.3E-14 | 3.3E-02 | 3.3E-14 | g.kg(w) <sup>-1</sup> |
| Species attached to suspended particles (>450 nm) (P) | 1.2E-04 | 1.2E-16 | 1.2E-04 | 1.3E-16 | g.kg(w) <sup>-1</sup> |
|                                                       |         |         |         |         |                       |
| <b>Other soil</b>                                     | 3.8E+06 | 2.6E-06 | 3.8E+06 | 2.6E-06 | g.kg(w) <sup>-1</sup> |
| Dissolved/Gas species (G/D)                           | 3.8E+06 | 2.6E-06 | 3.8E+06 | 2.6E-06 | g.kg(w) <sup>-1</sup> |
| * PORE WATER                                          | 2.5E+04 | 1.5E-07 | 2.5E+04 | 1.5E-07 | g.L <sup>-1</sup>     |
| * SOLID PHASE                                         | 3.8E+06 | 3.0E-06 | 3.8E+06 | 3.0E-06 | g.kg(d) <sup>-1</sup> |
| Solid species (S)                                     | 2.2E-05 | 1.5E-17 | 2.2E-05 | 1.5E-17 | g.kg(w) <sup>-1</sup> |
| Species attached to NCs (<450 nm) (A)                 | 6.1E+03 | 4.2E-09 | 6.1E+03 | 4.2E-09 | g.kg(w) <sup>-1</sup> |
| Species attached to suspended particles (>450 nm) (P) | 1.2E-01 | 8.1E-14 | 1.2E-01 | 8.1E-14 | g.kg(w) <sup>-1</sup> |
|                                                       |         |         |         |         |                       |
| Total D                                               | 3.9E+13 | 3.2E-04 | 3.9E+13 | 3.2E-04 | g.L <sup>-1</sup>     |
| Total S                                               | 7.3E-01 | 6.0E-18 | 7.3E-01 | 6.0E-18 | g.L <sup>-1</sup>     |
| Total A                                               | 3.5E+04 | 2.9E-13 | 3.5E+04 | 2.9E-13 | g.L <sup>-1</sup>     |
| Total P                                               | 1.7E-01 | 1.4E-18 | 1.7E-01 | 1.4E-18 | g.L <sup>-1</sup>     |
| <b>Total</b>                                          | 3.9E+13 | 3.2E-04 | 3.9E+13 | 3.2E-04 | g.L <sup>-1</sup>     |

41

42 Table S5. Comparison of steady-state mass and concentration calculations for nZnO, using SimpleBox4nano (v4.01-nano)  
 43 in Excel and the SimpleBox4nano web application under default scenarios within the tropic zone (all values are rounded  
 44 to one decimal point).

| nZnO                                                        |                                         |                |                |                |                        |
|-------------------------------------------------------------|-----------------------------------------|----------------|----------------|----------------|------------------------|
|                                                             | SimpleBox4nano (v4.01-nano)<br>in Excel |                | SimpleBox4nano |                |                        |
| Receiving<br>Compartment                                    | Masses (kg)                             | Concentrations | Masses (kg)    | Concentrations | Concentration<br>Units |
| <b>Air</b>                                                  | 2.7E+04                                 | 2.1E-10        | 2.7E+04        | 2.1E-10        | g.m <sup>-3</sup>      |
| Dissolved/Gas<br>species (G/D)                              | 2.3E+02                                 | 1.8E-12        | 2.3E+02        | 1.8E-12        | g.m <sup>-3</sup>      |
| * GAS PHASE                                                 | 9.9E-11                                 | 3.1E-24        | 9.9E-11        | 3.1E-24        | g.m <sup>-3</sup>      |
| * AEROSOL- and<br>CLOUD PHASES                              | 2.3E+02                                 | 1.8E-12        | 2.3E+02        | 1.8E-12        | g.m <sup>-3</sup>      |
| Solid species (S)                                           | 1.1E+00                                 | 8.7E-15        | 1.1E+00        | 8.7E-15        | g.m <sup>-3</sup>      |
| Species attached to<br>NCs (<450 nm) (A)                    | 2.6E+04                                 | 2.1E-10        | 2.6E+04        | 2.1E-10        | g.m <sup>-3</sup>      |
| Species attached to<br>suspended particles<br>(>450 nm) (P) | 3.7E-05                                 | 2.9E-19        | 3.7E-05        | 2.9E-19        | g.m <sup>-3</sup>      |
|                                                             |                                         |                |                |                |                        |
| <b>Surface sea/ocean<br/>water</b>                          | 4.4E+12                                 | 4.9E-04        | 4.4E+12        | 4.9E-04        | g.L <sup>-1</sup>      |
| Dissolved/Gas<br>species (G/D)                              | 4.4E+12                                 | 4.9E-04        | 4.4E+12        | 4.9E-04        | g.L <sup>-1</sup>      |
| * DISSOLVED                                                 | 4.4E+12                                 | 4.9E-04        | 4.4E+12        | 4.9E-04        | g.L <sup>-1</sup>      |
| * SUSPENDED<br>SOLIDS                                       | 3.2E+09                                 | 4.9E-02        | 3.2E+09        | 4.9E-02        | g.kg(d) <sup>-1</sup>  |
| Solid species (S)                                           | 1.6E-03                                 | 1.8E-19        | 1.6E-03        | 1.8E-19        | g.L <sup>-1</sup>      |
| Species attached to<br>NCs (<450 nm) (A)                    | 1.9E+04                                 | 2.2E-12        | 1.9E+04        | 2.2E-12        | g.L <sup>-1</sup>      |
| Species attached to<br>suspended particles<br>(>450 nm) (P) | 1.8E-02                                 | 2.1E-18        | 1.8E-02        | 2.1E-18        | g.L <sup>-1</sup>      |
|                                                             |                                         |                |                |                |                        |
| <b>Deep sea/ocean<br/>water</b>                             | 1.4E+14                                 | 5.3E-04        | 1.4E+14        | 5.3E-04        | g.L <sup>-1</sup>      |
| Dissolved/Gas<br>species (G/D)                              | 1.4E+14                                 | 5.3E-04        | 1.4E+14        | 5.3E-04        | g.L <sup>-1</sup>      |
| * DISSOLVED                                                 | 1.4E+14                                 | 5.3E-04        | 1.4E+14        | 5.3E-04        | g.L <sup>-1</sup>      |
| * SUSPENDED<br>SOLIDS                                       | 1.0E+11                                 | 5.3E-02        | 1.0E+11        | 5.3E-02        | g.kg(d) <sup>-1</sup>  |
| Solid species (S)                                           | 4.0E-07                                 | 1.5E-24        | 4.0E-07        | 1.5E-24        | g.L <sup>-1</sup>      |
| Species attached to<br>NCs (<450 nm) (A)                    | 2.7E+03                                 | 1.0E-14        | 2.7E+03        | 1.0E-14        | g.L <sup>-1</sup>      |
| Species attached to<br>suspended particles<br>(>450 nm) (P) | 6.2E-03                                 | 2.3E-20        | 6.2E-03        | 2.3E-20        | g.L <sup>-1</sup>      |
|                                                             |                                         |                |                |                |                        |
| <b>Marine sediment</b>                                      | 5.0E+10                                 | 1.4E-02        | 5.0E+10        | 1.4E-02        | g.kg(w) <sup>-1</sup>  |
| Dissolved/Gas<br>species (G/D)                              | 5.0E+10                                 | 1.4E-02        | 5.0E+10        | 1.4E-02        | g.kg(w) <sup>-1</sup>  |
| * PORE WATER                                                | 4.0E+10                                 | 7.3E-04        | 4.0E+10        | 7.3E-04        | g.L <sup>-1</sup>      |
| * SOLID PHASE                                               | 1.0E+10                                 | 3.6E-02        | 1.0E+10        | 3.6E-02        | g.kg(d) <sup>-1</sup>  |
| Solid species (S)                                           | 1.3E-15                                 | 3.7E-28        | 1.3E-15        | 3.7E-28        | g.kg(w) <sup>-1</sup>  |

|                                                       |         |         |         |         |                       |
|-------------------------------------------------------|---------|---------|---------|---------|-----------------------|
| Species attached to NCs (<450 nm) (A)                 | 6.5E-02 | 1.9E-14 | 6.5E-02 | 1.9E-14 | g.kg(w) <sup>-1</sup> |
| Species attached to suspended particles (>450 nm) (P) | 6.0E-05 | 1.7E-17 | 6.0E-05 | 1.7E-17 | g.kg(w) <sup>-1</sup> |
|                                                       |         |         |         |         |                       |
| <b>Other soil</b>                                     | 1.3E+06 | 3.9E-07 | 1.3E+06 | 3.9E-07 | g.kg(w) <sup>-1</sup> |
| Dissolved/Gas species (G/D)                           | 1.3E+06 | 3.9E-07 | 1.3E+06 | 3.9E-07 | g.kg(w) <sup>-1</sup> |
| * PORE WATER                                          | 8.4E+03 | 2.2E-08 | 8.4E+03 | 2.2E-08 | g.L <sup>-1</sup>     |
| * SOLID PHASE                                         | 1.3E+06 | 4.4E-07 | 1.3E+06 | 4.4E-07 | g.kg(d) <sup>-1</sup> |
| Solid species (S)                                     | 4.7E-05 | 1.4E-17 | 4.7E-05 | 1.4E-17 | g.kg(w) <sup>-1</sup> |
| Species attached to NCs (<450 nm) (A)                 | 1.0E+04 | 3.2E-09 | 1.0E+04 | 3.2E-09 | g.kg(w) <sup>-1</sup> |
| Species attached to suspended particles (>450 nm) (P) | 2.5E-01 | 7.8E-14 | 2.5E-01 | 7.8E-14 | g.kg(w) <sup>-1</sup> |
|                                                       |         |         |         |         |                       |
| Total D                                               | 1.5E+14 | 3.6E-04 | 1.5E+14 | 3.6E-04 | g.L <sup>-1</sup>     |
| Total S                                               | 1.1E+00 | 2.8E-18 | 1.1E+00 | 2.8E-18 | g.L <sup>-1</sup>     |
| Total A                                               | 5.9E+04 | 1.5E-13 | 5.9E+04 | 1.5E-13 | g.L <sup>-1</sup>     |
| Total P                                               | 2.8E-01 | 6.9E-19 | 2.8E-01 | 6.9E-19 | g.L <sup>-1</sup>     |
| <b>Total</b>                                          | 1.5E+14 | 3.6E-04 | 1.5E+14 | 3.6E-04 | g.L <sup>-1</sup>     |

45

46 S2. Comparison of steady-state mass flow (kg s<sup>-1</sup>) calculations using SimpleBox4nano (v4.01-nano) in Excel and the *SimpleBox4nano* web application

47

48 Table S6. Steady-state mass flows (kg s<sup>-1</sup>) calculations for nZnO, using SimpleBox4nano (v4.01-nano) in Excel under default scenarios (all values are rounded to one decimal point).

| Dissolved species                           |      | Emission | Inflow  | Outflow | Removal | Formation (S,A,P->D) | Degradation | air-water transport | water-air transport | air-soil transport | soil-air transport | soil-water transport | water-sed transport | sed-water transport | mass balance |
|---------------------------------------------|------|----------|---------|---------|---------|----------------------|-------------|---------------------|---------------------|--------------------|--------------------|----------------------|---------------------|---------------------|--------------|
| <b>Regional Scale</b>                       |      |          |         |         |         |                      |             |                     |                     |                    |                    |                      |                     |                     |              |
| air                                         | aR   | 3.2E-01  | 5.9E-03 | 1.9E-01 | 7.3E-06 |                      | 7.6E-29     | 1.4E-01             | 2.0E-18             |                    |                    |                      |                     |                     | 0.0E+00      |
| fresh water lakes                           | w0R  |          | 0.0E+00 | 4.3E-04 |         | 9.2E-05              | 7.3E-17     | 3.4E-04             | 9.0E-24             |                    |                    |                      | 1.4E-06             | 0.0E+00             | 0.0E+00      |
| fresh water                                 | w1R  | 3.2E-01  | 4.3E-04 | 1.4E+00 |         | 2.6E-01              | 7.7E-14     | 3.7E-03             | 3.2E-19             |                    |                    | 7.7E-01              | 4.9E-01             | 5.2E-01             | 0.0E+00      |
| coastal sea water                           | w2R  | 0.0E+00  | 7.4E+00 | 7.4E+00 |         | 6.3E-03              | 2.2E-14     | 5.9E-04             | 2.7E-20             |                    |                    |                      | 2.6E-02             | 2.6E-02             | 0.0E+00      |
| fresh water sediment                        | sd1R |          |         |         | 2.4E-02 | 5.4E-02              | 3.4E-14     |                     |                     |                    |                    |                      | 4.9E-01             | 5.2E-01             | 0.0E+00      |
| coastal marine sediment                     | sd2R |          |         |         | 5.4E-04 | 2.2E-04              | 2.4E-15     |                     |                     |                    |                    |                      | 2.6E-02             | 2.6E-02             | 0.0E+00      |
| natural soil                                | s1R  | 0.0E+00  |         |         | 2.7E-04 | 4.0E-03              | 3.5E-14     |                     |                     | 3.7E-02            | 8.6E-20            | 4.0E-02              |                     |                     | 0.0E+00      |
| agricultural soil                           | s2R  | 3.2E-01  |         |         | 4.8E-03 | 3.2E-01              | 1.3E-12     |                     |                     | 8.1E-02            | 1.5E-18            | 7.1E-01              |                     |                     | 0.0E+00      |
| other soil                                  | s3R  | 0.0E+00  |         |         | 1.0E-04 | 1.5E-03              | 1.3E-14     |                     |                     | 1.4E-02            | 3.2E-20            | 1.5E-02              |                     |                     | 0.0E+00      |
| <b>Continental Scale</b>                    |      |          |         |         |         |                      |             |                     |                     |                    |                    |                      |                     |                     |              |
| air                                         | aC   | 0.0E+00  | 1.9E-01 | 3.3E-02 | 7.2E-06 |                      | 7.5E-29     | 1.5E-01             | 8.7E-17             |                    |                    |                      |                     |                     | 0.0E+00      |
| fresh water lakes                           | w0C  |          | 0.0E+00 | 3.8E-04 |         | 1.9E-04              | 6.4E-16     | 2.0E-04             | 8.0E-23             |                    |                    |                      | 1.2E-05             | 0.0E+00             | 0.0E+00      |
| fresh water                                 | w1C  | 0.0E+00  | 3.8E-04 | 1.1E-01 |         | 4.7E-03              | 6.3E-15     | 2.2E-03             | 2.6E-20             |                    |                    | 1.1E-01              | 4.0E-02             | 3.8E-02             | 0.0E+00      |
| coastal sea water                           | w2C  | 0.0E+00  | 1.1E+04 | 1.1E+04 |         | 7.5E-02              | 1.4E-09     | 7.5E-02             | 8.6E-17             |                    |                    |                      | 8.3E+01             | 8.1E+01             | 0.0E+00      |
| fresh water sediment                        | sd1C |          |         |         | 1.8E-03 | 7.3E-05              | 2.5E-15     |                     |                     |                    |                    |                      | 4.0E-02             | 3.8E-02             | 0.0E+00      |
| coastal marine sediment                     | sd2C |          |         |         | 1.7E+00 | 2.8E-05              | 7.4E-12     |                     |                     |                    |                    |                      | 8.3E+01             | 8.1E+01             | 0.0E+00      |
| natural soil                                | s1C  | 0.0E+00  |         |         | 2.0E-04 | 8.3E-03              | 2.6E-14     |                     |                     | 2.1E-02            | 6.3E-20            | 3.0E-02              |                     |                     | 0.0E+00      |
| agricultural soil                           | s2C  | 0.0E+00  |         |         | 4.5E-04 | 2.0E-02              | 1.3E-13     |                     |                     | 4.8E-02            | 1.4E-19            | 6.7E-02              |                     |                     | 0.0E+00      |
| other soil                                  | s3C  | 0.0E+00  |         |         | 7.3E-05 | 3.1E-03              | 9.5E-15     |                     |                     | 7.9E-03            | 2.3E-20            | 1.1E-02              |                     |                     | 0.0E+00      |
| <b>Global Scale - Moderate climate zone</b> |      |          |         |         |         |                      |             |                     |                     |                    |                    |                      |                     |                     |              |
| air                                         | aM   | 0.0E+00  | 2.7E-02 | 3.5E-03 | 1.1E-06 |                      | 1.2E-29     | 2.4E-02             | 9.6E-16             |                    |                    |                      |                     |                     | 0.0E+00      |
| upper ocean water                           | w2M  | 0.0E+00  | 5.6E+05 | 5.6E+05 |         | 6.6E-02              | 7.7E-09     | 1.2E-02             | 9.6E-16             |                    |                    | 6.1E-02              |                     |                     | 0.0E+00      |
| deep sea                                    | w3M  |          | 5.5E+05 | 5.5E+05 |         | 9.9E-03              | 2.3E-07     |                     |                     |                    |                    |                      | 9.2E+02             | 9.2E+02             | 0.0E+00      |
| ocean sediment                              | sdM  |          |         |         | 6.1E-02 | 1.5E-07              | 8.3E-11     |                     |                     |                    |                    |                      | 9.2E+02             | 9.2E+02             | 0.0E+00      |
| soil                                        | sM   | 0.0E+00  |         |         | 4.1E-04 | 5.0E-02              | 5.3E-14     |                     |                     | 1.2E-02            | 1.3E-19            | 6.1E-02              |                     |                     | 0.0E+00      |
| <b>Global Scale - Arctic climate zone</b>   |      |          |         |         |         |                      |             |                     |                     |                    |                    |                      |                     |                     |              |
| air                                         | aA   | 0.0E+00  | 1.1E-03 | 9.1E-05 | 4.8E-08 |                      | 4.2E-31     | 1.1E-03             | 1.7E-21             |                    |                    |                      |                     |                     | 0.0E+00      |
| upper ocean water                           | w2A  | 0.0E+00  | 4.1E+05 | 4.1E+05 |         | 1.3E-02              | 1.3E-09     | 6.3E-04             | 1.7E-21             |                    |                    | 6.5E-03              |                     |                     | 0.0E+00      |
| deep sea                                    | w3A  |          | 4.1E+05 | 4.1E+05 |         | 2.2E-03              | 3.3E-08     |                     |                     |                    |                    |                      | 6.1E+02             | 6.1E+02             | 0.0E+00      |
| ocean sediment                              | sdA  |          |         |         | 2.8E-02 | 3.3E-08              | 1.2E-11     |                     |                     |                    |                    |                      | 6.1E+02             | 6.1E+02             | 0.0E+00      |
| soil                                        | sA   | 0.0E+00  |         |         | 4.3E-05 | 6.1E-03              | 3.4E-15     |                     |                     | 4.2E-04            | 8.5E-26            | 6.5E-03              |                     |                     | 0.0E+00      |
| <b>Global Scale - Tropical climate zone</b> |      |          |         |         |         |                      |             |                     |                     |                    |                    |                      |                     |                     |              |
| air                                         | aT   | 0.0E+00  | 2.0E-03 | 9.4E-05 | 8.6E-08 |                      | 3.9E-30     | 1.9E-03             | 2.0E-12             |                    |                    |                      |                     |                     | 0.0E+00      |
| upper ocean water                           | w2T  | 0.0E+00  | 1.1E+06 | 1.1E+06 |         | 3.2E-02              | 4.4E-08     | 1.3E-03             | 2.0E-12             |                    |                    | 1.1E-02              |                     |                     | 0.0E+00      |
| deep sea                                    | w3T  |          | 1.1E+06 | 1.1E+06 |         | 4.4E-03              | 1.4E-06     |                     |                     |                    |                    |                      | 2.3E+03             | 2.3E+03             | 0.0E+00      |
| ocean sediment                              | sdT  |          |         |         | 1.1E-01 | 6.5E-08              | 5.0E-10     |                     |                     |                    |                    |                      | 2.3E+03             | 2.3E+03             | 0.0E+00      |
| soil                                        | sT   | 0.0E+00  |         |         | 7.4E-05 | 1.0E-02              | 1.3E-14     |                     |                     | 5.7E-04            | 1.1E-17            | 1.1E-02              |                     |                     | 0.0E+00      |
|                                             |      | 9.5E-01  |         |         | 1.9E+00 |                      | 1.7E-06     |                     |                     |                    |                    |                      |                     |                     | 0.0E+00      |

49

50 Table S7. Steady-state mass flows (kg s<sup>-1</sup>) calculations for nZnO, using SimpleBox4nano web application under default scenarios (all values are rounded to one decimal point).

| Dissolved species                           |      | Emission | Inflow  | Outflow | Removal | Formation (S,A,P->D) | Degradation | air-water transport | water-air transport | air-soil transport | soil-air transport | soil-water transport | water-sed transport | sed-water transport | mass balance |
|---------------------------------------------|------|----------|---------|---------|---------|----------------------|-------------|---------------------|---------------------|--------------------|--------------------|----------------------|---------------------|---------------------|--------------|
| <b>Regional Scale</b>                       |      |          |         |         |         |                      |             |                     |                     |                    |                    |                      |                     |                     |              |
| air                                         | aR   | 3.2E-01  | 5.9E-03 | 1.9E-01 | 7.3E-06 |                      | 1.1E-28     | 1.4E-01             | 3.7E-18             |                    |                    |                      |                     |                     | 0.0E+00      |
| fresh water lakes                           | w0R  |          | 0.0E+00 | 4.3E-04 |         | 9.2E-05              | 7.3E-17     | 3.4E-04             | 2.1E-23             |                    |                    |                      | 1.4E-06             | 0.0E+00             | 0.0E+00      |
| fresh water                                 | w1R  | 3.2E-01  | 4.3E-04 | 1.4E+00 |         | 2.6E-01              | 7.7E-14     | 3.7E-03             | 7.5E-19             |                    |                    | 7.7E-01              | 4.9E-01             | 5.2E-01             | 0.0E+00      |
| coastal sea water                           | w2R  | 0.0E+00  | 7.4E+00 | 7.4E+00 |         | 6.3E-03              | 2.2E-14     | 5.9E-04             | 6.5E-20             |                    |                    |                      | 2.6E-02             | 2.6E-02             | 0.0E+00      |
| fresh water sediment                        | sd1R |          |         |         | 2.4E-02 | 5.4E-02              | 3.4E-14     |                     |                     |                    |                    |                      | 4.9E-01             | 5.2E-01             | 0.0E+00      |
| coastal marine sediment                     | sd2R |          |         |         | 5.4E-04 | 2.2E-04              | 2.4E-15     |                     |                     |                    |                    |                      | 2.6E-02             | 2.6E-02             | 0.0E+00      |
| natural soil                                | s1R  | 0.0E+00  |         |         | 2.7E-04 | 4.0E-03              | 3.5E-14     |                     |                     | 3.7E-02            | 1.5E-19            | 4.0E-02              |                     |                     | 0.0E+00      |
| agricultural soil                           | s2R  | 3.2E-01  |         |         | 4.8E-03 | 3.2E-01              | 1.4E-12     |                     |                     | 8.1E-02            | 2.7E-18            | 7.1E-01              |                     |                     | 0.0E+00      |
| other soil                                  | s3R  | 0.0E+00  |         |         | 1.0E-04 | 1.5E-03              | 1.3E-14     |                     |                     | 1.4E-02            | 5.7E-20            | 1.5E-02              |                     |                     | 0.0E+00      |
| <b>Continental Scale</b>                    |      |          |         |         |         |                      |             |                     |                     |                    |                    |                      |                     |                     |              |
| air                                         | aC   | 0.0E+00  | 1.9E-01 | 3.3E-02 | 7.2E-06 |                      | 1.1E-28     | 1.5E-01             | 2.0E-16             |                    |                    |                      |                     |                     | 0.0E+00      |
| fresh water lakes                           | w0C  |          | 0.0E+00 | 3.8E-04 |         | 1.9E-04              | 6.4E-16     | 2.0E-04             | 1.9E-22             |                    |                    |                      | 1.2E-05             | 0.0E+00             | 0.0E+00      |
| fresh water                                 | w1C  | 0.0E+00  | 3.8E-04 | 1.1E-01 |         | 4.7E-03              | 6.3E-15     | 2.2E-03             | 6.2E-20             |                    |                    | 1.1E-01              | 4.0E-02             | 3.8E-02             | 0.0E+00      |
| coastal sea water                           | w2C  | 0.0E+00  | 1.1E+04 | 1.1E+04 |         | 7.5E-02              | 1.4E-09     | 7.5E-02             | 2.0E-16             |                    |                    |                      | 8.3E+01             | 8.1E+01             | 0.0E+00      |
| fresh water sediment                        | sd1C |          |         |         | 1.8E-03 | 7.3E-05              | 2.5E-15     |                     |                     |                    |                    |                      | 4.0E-02             | 3.8E-02             | 0.0E+00      |
| coastal marine sediment                     | sd2C |          |         |         | 1.7E+00 | 2.8E-05              | 7.4E-12     |                     |                     |                    |                    |                      | 8.3E+01             | 8.1E+01             | 0.0E+00      |
| natural soil                                | s1C  | 0.0E+00  |         |         | 2.0E-04 | 8.3E-03              | 2.6E-14     |                     |                     | 2.1E-02            | 1.1E-19            | 3.0E-02              |                     |                     | 0.0E+00      |
| agricultural soil                           | s2C  | 0.0E+00  |         |         | 4.5E-04 | 2.0E-02              | 1.3E-13     |                     |                     | 4.8E-02            | 2.6E-19            | 6.7E-02              |                     |                     | 0.0E+00      |
| other soil                                  | s3C  | 0.0E+00  |         |         | 7.3E-05 | 3.1E-03              | 9.5E-15     |                     |                     | 7.9E-03            | 4.2E-20            | 1.1E-02              |                     |                     | 0.0E+00      |
| <b>Global Scale - Moderate climate zone</b> |      |          |         |         |         |                      |             |                     |                     |                    |                    |                      |                     |                     |              |
| air                                         | aM   | 0.0E+00  | 2.7E-02 | 3.5E-03 | 1.1E-06 |                      | 1.7E-29     | 2.4E-02             | 2.3E-15             |                    |                    |                      |                     |                     | 0.0E+00      |
| upper ocean water                           | w2M  | 0.0E+00  | 5.6E+05 | 5.6E+05 |         | 6.6E-02              | 7.7E-09     | 1.2E-02             | 2.3E-15             |                    |                    | 6.1E-02              |                     |                     | 3.7E-06      |
| deep sea                                    | w3M  |          | 5.5E+05 | 5.5E+05 |         | 9.9E-03              | 2.3E-07     |                     |                     |                    |                    |                      | 9.2E+02             | 9.2E+02             | -3.2E-06     |
| ocean sediment                              | sdM  |          |         |         | 6.1E-02 | 1.5E-07              | 8.3E-11     |                     |                     |                    |                    |                      | 9.2E+02             | 9.2E+02             | 0.0E+00      |
| soil                                        | sM   | 0.0E+00  |         |         | 4.1E-04 | 5.0E-02              | 5.3E-14     |                     |                     | 1.2E-02            | 2.4E-19            | 6.1E-02              |                     |                     | 0.0E+00      |
| <b>Global Scale - Arctic climate zone</b>   |      |          |         |         |         |                      |             |                     |                     |                    |                    |                      |                     |                     |              |
| air                                         | aA   | 0.0E+00  | 1.1E-03 | 9.1E-05 | 4.8E-08 |                      | 6.3E-31     | 1.1E-03             | 1.3E-20             |                    |                    |                      |                     |                     | 0.0E+00      |
| upper ocean water                           | w2A  | 0.0E+00  | 4.1E+05 | 4.1E+05 |         | 1.4E-02              | 1.4E-09     | 6.3E-04             | 1.3E-20             |                    |                    | 6.5E-03              |                     |                     | -5.0E-07     |
| deep sea                                    | w3A  |          | 4.1E+05 | 4.1E+05 |         | 2.2E-03              | 3.3E-08     |                     |                     |                    |                    |                      | 6.1E+02             | 6.1E+02             | 0.0E+00      |
| ocean sediment                              | sdA  |          |         |         | 2.8E-02 | 3.3E-08              | 1.2E-11     |                     |                     |                    |                    |                      | 6.1E+02             | 6.1E+02             | 0.0E+00      |
| soil                                        | sA   | 0.0E+00  |         |         | 4.3E-05 | 6.1E-03              | 3.4E-15     |                     |                     | 4.2E-04            | 4.7E-25            | 6.5E-03              |                     |                     | 0.0E+00      |
| <b>Global Scale - Tropical climate zone</b> |      |          |         |         |         |                      |             |                     |                     |                    |                    |                      |                     |                     |              |
| air                                         | aT   | 0.0E+00  | 2.0E-03 | 9.4E-05 | 8.6E-08 |                      | 3.9E-30     | 1.9E-03             | 2.6E-12             |                    |                    |                      |                     |                     | 0.0E+00      |
| upper ocean water                           | w2T  | 0.0E+00  | 1.1E+06 | 1.1E+06 |         | 3.2E-02              | 4.4E-08     | 1.3E-03             | 2.6E-12             |                    |                    | 1.1E-02              |                     |                     | 0.0E+00      |
| deep sea                                    | w3T  |          | 1.1E+06 | 1.1E+06 |         | 4.4E-03              | 1.4E-06     |                     |                     |                    |                    |                      | 2.3E+03             | 2.3E+03             | 0.0E+00      |
| ocean sediment                              | sdT  |          |         |         | 1.1E-01 | 6.5E-08              | 5.0E-10     |                     |                     |                    |                    |                      | 2.3E+03             | 2.3E+03             | 0.0E+00      |
| soil                                        | sT   | 0.0E+00  |         |         | 7.4E-05 | 1.0E-02              | 1.3E-14     |                     |                     | 5.7E-04            | 1.1E-17            | 1.1E-02              |                     |                     | 0.0E+00      |
|                                             |      | 9.5E-01  |         |         | 1.9E+00 |                      | 1.7E-06     |                     |                     |                    |                    |                      |                     |                     | 0.0E+00      |

51

52 **S3. Comparison of dynamic output**

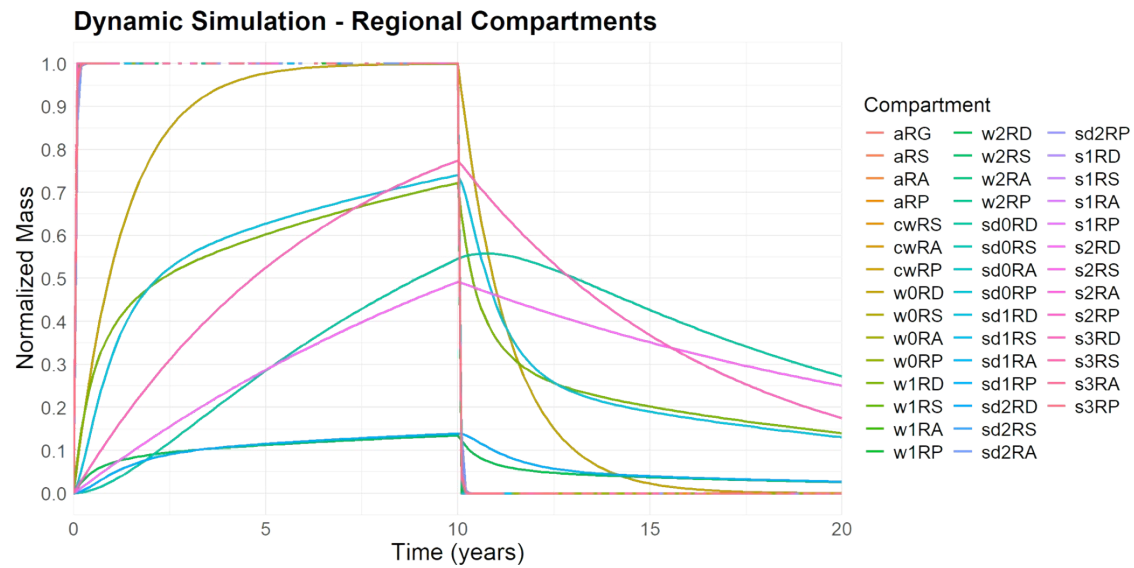

53

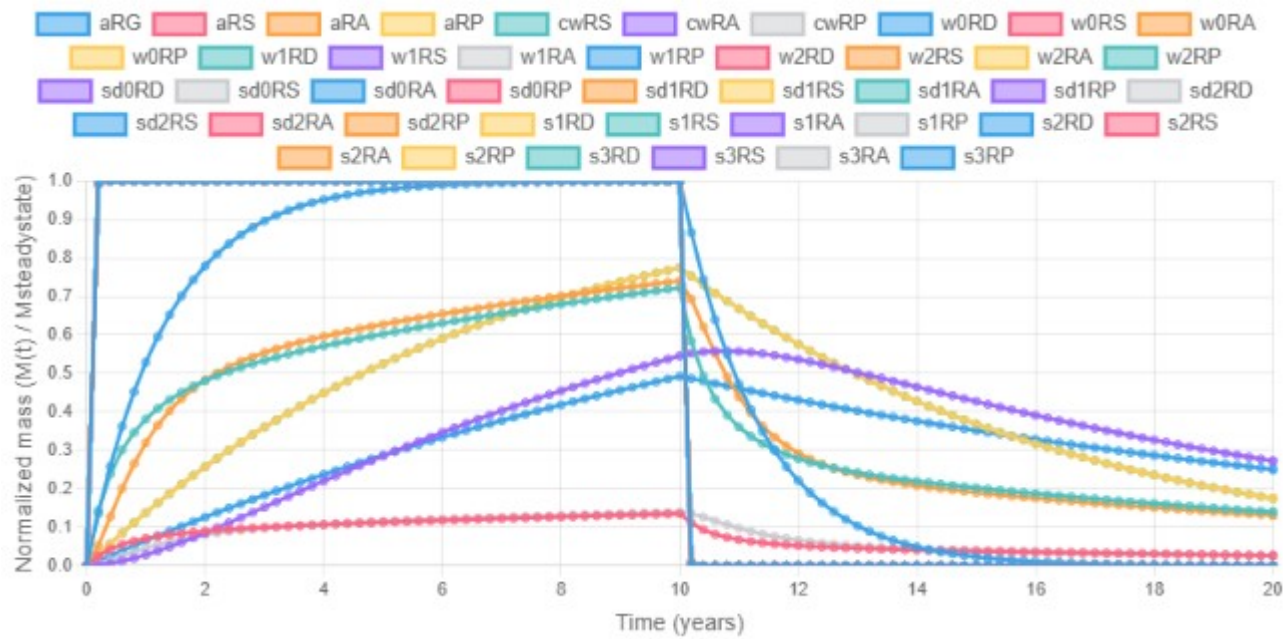

54

55 **Figure S1.** Comparison of dynamic calculations of normalized mass (defined as the ratio of dynamic mass divided by the steady-state mass) over time for nZnO, determined using  
 56 the Dynamic Rshell for SimpleBox4nano (v4.01-nano) and the *SimpleBox4nano* web application (bottom panel), under default scenarios within the regional scale.

57

### Dynamic Simulation - Continental Compartments

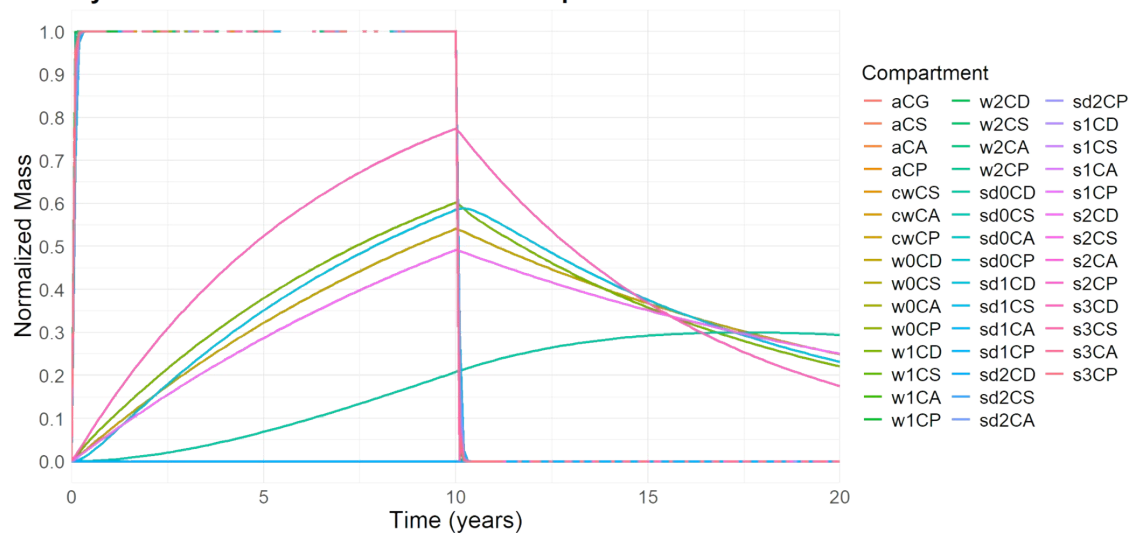

58

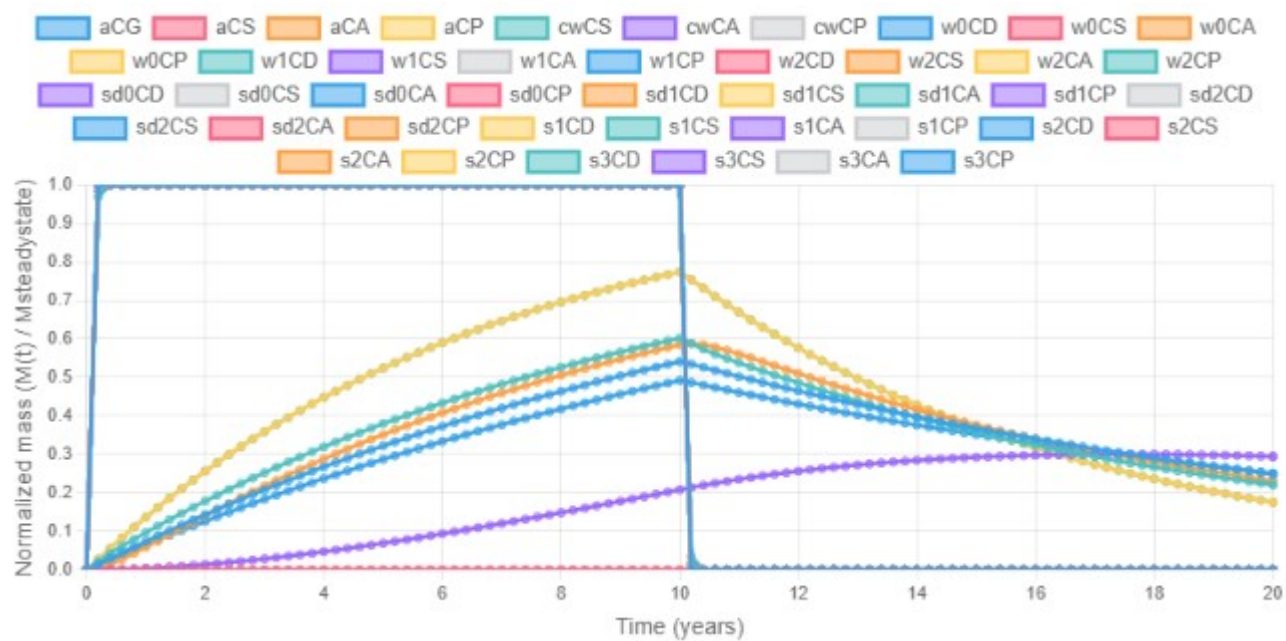

59

60 **Figure S2.** Comparison of dynamic calculations of normalized mass (defined as the ratio of dynamic mass divided by the steady-state mass) over time for nZnO, determined using  
 61 the Dynamic Rshell for SimpleBox4nano (v4.01-nano) and the *SimpleBox4nano* web application (bottom panel), under default scenarios within the continental scale.

62

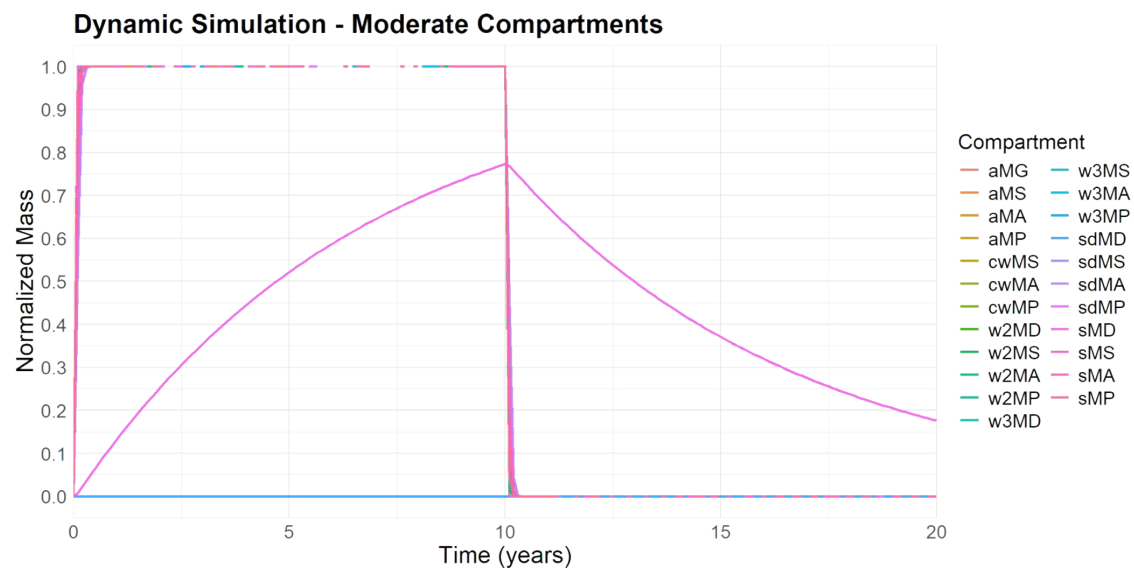

63

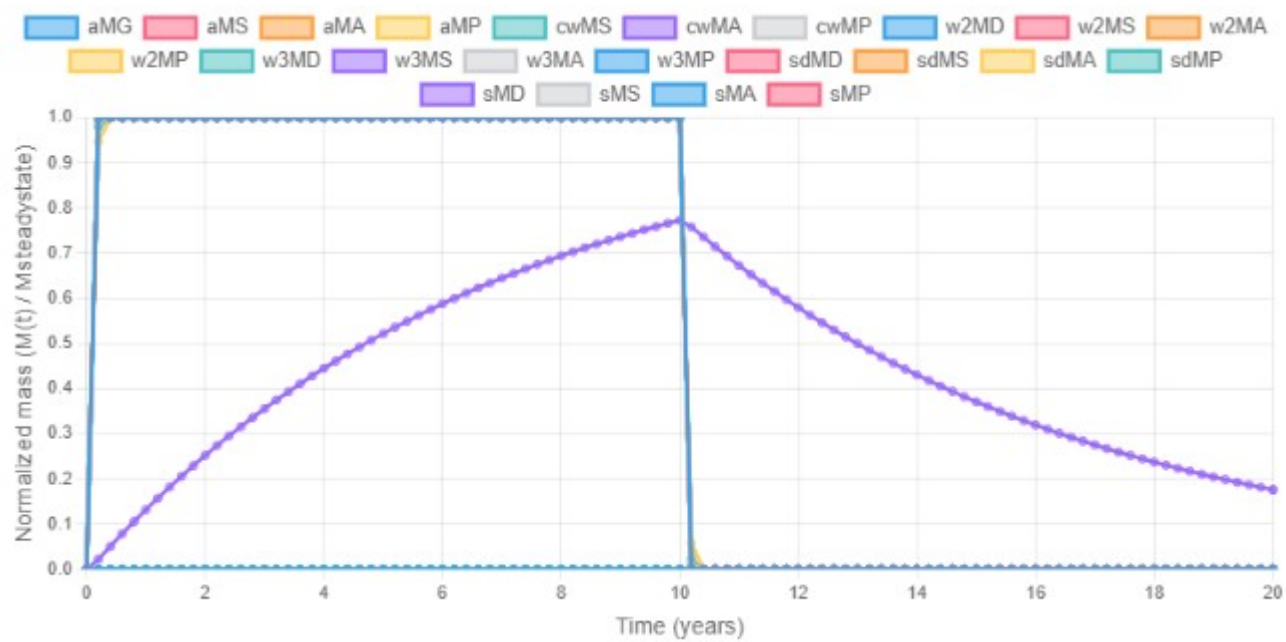

64

65 **Figure S3.** Comparison of dynamic calculations of normalized mass (defined as the ratio of dynamic mass divided by the steady-state mass) over time for nZnO, determined using  
 66 the Dynamic Rshell for SimpleBox4nano (v4.01-nano) and the *SimpleBox4nano* web application (bottom panel), under default scenarios within the moderate zone.

67

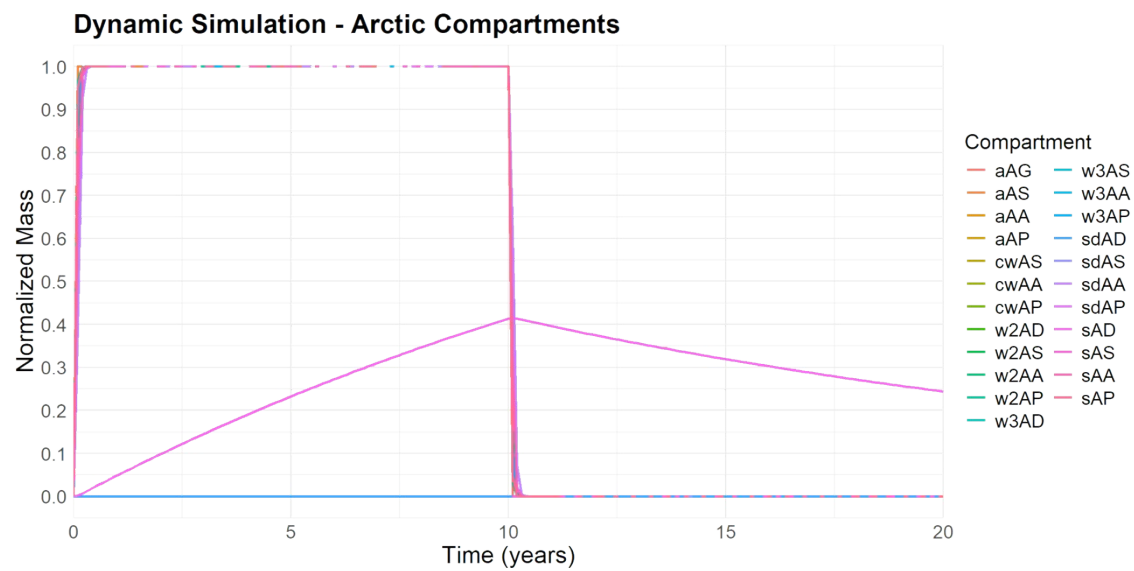

68

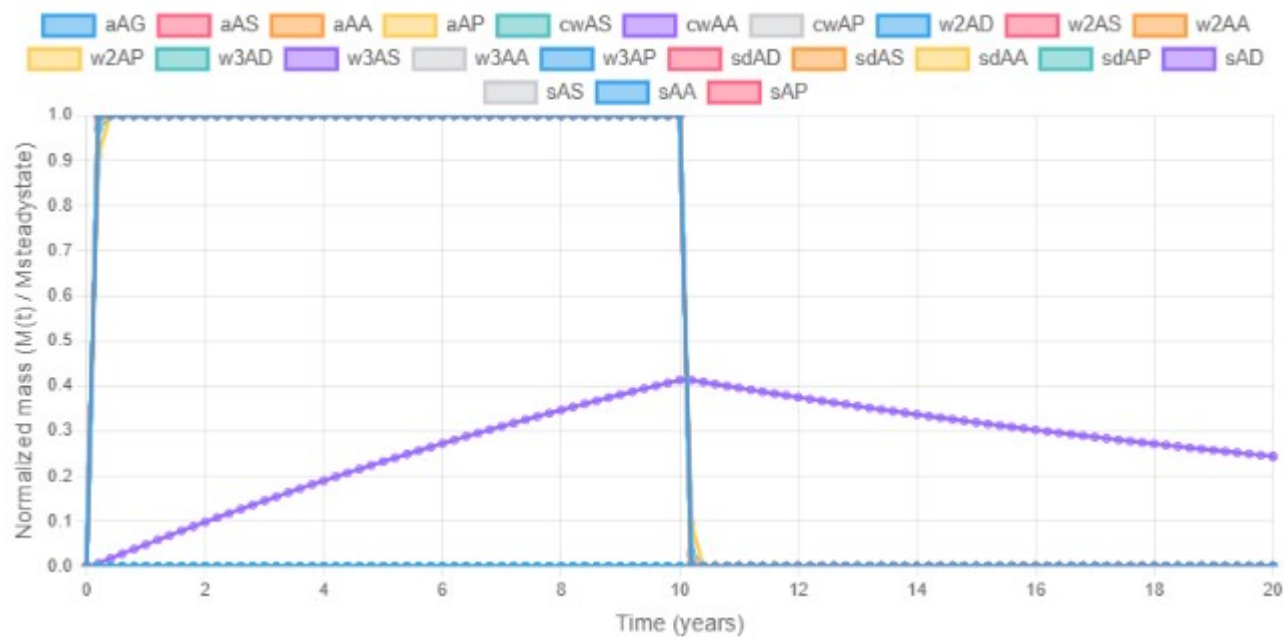

69

70 **Figure S4.** Comparison of dynamic calculations of normalized mass (defined as the ratio of dynamic mass divided by the steady-state mass) over time for nZnO, determined using  
 71 the Dynamic Rshell for SimpleBox4nano (v4.01-nano) and the *SimpleBox4nano* web application (bottom panel), under default scenarios within the arctic zone.

72

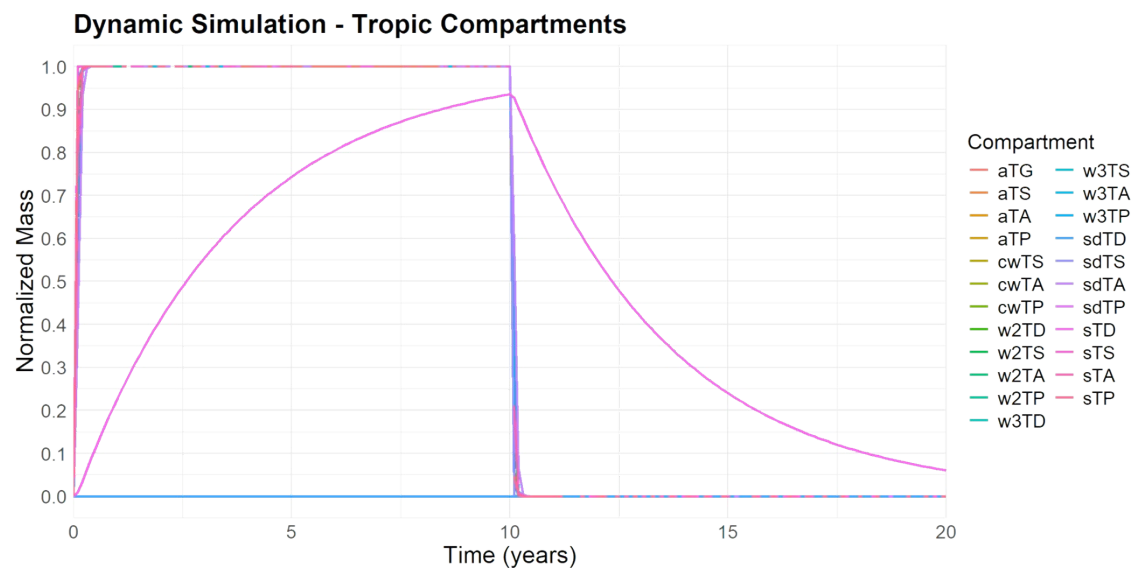

73

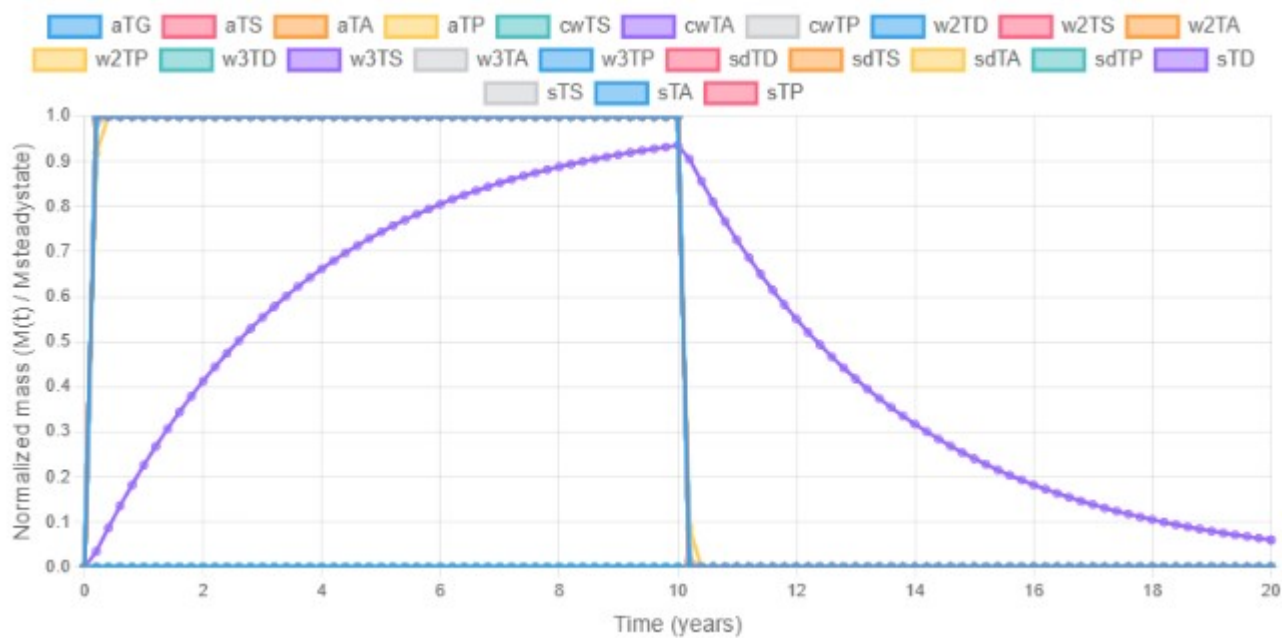

74

75 **Figure S5.** Comparison of dynamic calculations of normalized mass (defined as the ratio of dynamic mass divided by the steady-state mass) over time for nZnO, determined using  
 76 the Dynamic Rshell for SimpleBox4nano (v4.01-nano) and the *SimpleBox4nano* web application (bottom panel), under default scenarios within the tropic zone.

77

78 S4. Output window after selecting 'Execute Steady-State Simulation'

Steady-State Simulation Table 1 Table 2 Graphical Output of Scale Zone Compartments

### Steady-State Simulation

**Objective:** To determine the equilibrium distribution of a chemical under constant input conditions.

**Mathematical Basis:** The system assumes that the inputs (emissions) and outputs (degradation, advection, etc.) are constant, and the net change in mass (i.e.,  $dM/dt$ ) is zero in each compartment.

**Key Equation:** The steady-state mass balance equation is solved by setting:

$$\frac{dM}{dt} = 0 \Rightarrow \mathbf{K} \cdot \mathbf{M}_{ss} + \mathbf{E} = 0$$

where:

- $\mathbf{K}$  ( $s^{-1}$ ) is the matrix of transfer rate coefficients between compartments,
- $\mathbf{M}_{ss}$  (kg) is the vector of masses (or fugacities) in compartments at steady-state,
- $\mathbf{E}$  ( $kg\ s^{-1}$ ) is the vector of constant emission rates

The model computes the **steady-state fugacity or mass** in each compartment using algebraic methods such as matrix inversion (e.g., solving  $\mathbf{M} = -\mathbf{K}^{-1} \cdot \mathbf{E}$ ). The result tells you the **long-term average concentrations** assuming emissions are constant.

79

Steady-State Simulation Table 1 Table 2 Graphical Output of Scale Zone Compartments

Download Table 1

|                                                       | Masses (kg) |        |           |        |           |        |           |           |           |        | Concentrations |   |
|-------------------------------------------------------|-------------|--------|-----------|--------|-----------|--------|-----------|-----------|-----------|--------|----------------|---|
|                                                       | Reg         | Cont   | Mod       | Arct   | Trop      | Reg    | Cont      | Mod       | Arct      | Trop   | Reg            |   |
| Air                                                   | 5.612E+04   | 0.01 % | 1.597E+05 | 0.00 % | 9.148E+04 | 0.00 % | 1.891E+04 | 4.858E-10 | 2.791E+04 | 0.00 % | 2.444E-07      | 2 |
| Dissolved/Gas species (G/D)                           | 1.983E+04   | 0.01 % | 1.975E+04 | 0.00 % | 3.028E+03 | 0.00 % | 1.319E+02 | 3.388E-12 | 2.344E+02 | 0.00 % | 8.640E-08      | 2 |
| * GAS PHASE                                           | 2.951E-08   | 0.00 % | 2.939E-08 | 0.00 % | 4.506E-09 | 0.00 % | 1.962E-10 | 5.040E-24 | 3.488E-10 | 0.00 % | 1.285E-19      | 4 |
| * AEROSOL- and CLOUD PHASES                           | 1.983E+04   | 0.01 % | 1.975E+04 | 0.00 % | 3.028E+03 | 0.00 % | 1.319E+02 | 3.388E-12 | 2.344E+02 | 0.00 % | 8.640E-08      | 2 |
| Solid species (S)                                     | 1.160E+04   | 0.00 % | 5.394E+03 | 0.00 % | 3.716E+02 | 0.00 % | 7.653E+00 | 1.966E-13 | 1.192E+01 | 0.00 % | 5.054E-08      | 7 |
| Species attached to NCs (<450 nm) (A)                 | 2.468E+04   | 0.01 % | 1.345E+05 | 0.00 % | 8.808E+04 | 0.00 % | 1.877E+04 | 4.822E-10 | 2.766E+04 | 0.00 % | 1.075E-07      | 1 |
| Species attached to suspended particles (>450 nm) (P) | 1.117E+00   | 0.00 % | 7.080E-01 | 0.00 % | 5.224E-02 | 0.00 % | 2.726E-03 | 7.003E-17 | 9.713E-04 | 0.00 % | 4.867E-12      | 9 |
| Fresh water lake                                      | 1.941E+04   | 0.01 % | 1.756E+05 | 0.00 % |           |        |           |           |           |        | 3.398E-07      | 1 |
| Dissolved/Gas species (G/D)                           | 1.754E+04   | 0.00 % | 1.705E+05 | 0.00 % |           |        |           |           |           |        | 3.069E-07      | 1 |
| * DISSOLVED                                           | 1.753E+04   | 0.00 % | 1.704E+05 | 0.00 % |           |        |           |           |           |        | 3.068E-07      | 1 |
| * SUSPENDED SOLIDS                                    | 4.733E+00   | 0.00 % | 4.602E+01 | 0.00 % |           |        |           |           |           |        | 3.068E-05      | 1 |
| Solid species (S)                                     | 4.733E+00   | 0.00 % | 4.602E+01 | 0.00 % |           |        |           |           |           |        | 3.068E-12      | 1 |

80

Steady-State Simulation Table 1 Table 2 Graphical Output of Scale Zone Compartments

Download Table 2

| Dissolved species       |      | Emission  | Inflow    | Outflow   | Removal   | Formation (S,A,P->D) | Degradation | air-water | water-air | air-soil  | soil-air  | soil-water |
|-------------------------|------|-----------|-----------|-----------|-----------|----------------------|-------------|-----------|-----------|-----------|-----------|------------|
|                         |      |           |           |           |           |                      |             | transport | transport | transport | transport | transport  |
| Regional Scale          |      |           |           |           |           |                      |             |           |           |           |           |            |
| air                     | aR   | 3.171E-01 | 5.933E-03 | 1.868E-01 | 7.266E-06 |                      | 2.655E-28   | 1.362E-01 | 4.646E-17 |           |           |            |
| fresh water lakes       | w0R  | 0.000E+00 | 4.204E-04 | 4.204E-04 |           | 8.279E-05            | 7.120E-17   | 3.390E-04 | 2.620E-22 |           |           |            |
| fresh water             | w1R  | 3.171E-01 | 4.204E-04 | 1.270E+00 |           | 6.730E-02            | 7.090E-14   | 3.729E-03 | 8.697E-18 |           |           | 7.691E-01  |
| coastal sea water       | w2R  | 0.000E+00 | 7.298E+00 | 7.380E+00 |           | 8.176E-02            | 2.186E-14   | 5.932E-04 | 8.047E-19 |           |           |            |
| fresh water sediment    | sd1R |           |           |           | 2.646E-02 | 1.392E-01            | 3.712E-14   |           |           |           |           |            |
| coastal marine sediment | sd2R |           |           |           | 5.417E-04 | 6.534E-04            | 2.406E-15   |           |           |           |           |            |
| natural soil            | s1R  | 0.000E+00 |           |           | 2.718E-04 | 4.209E-03            | 3.508E-14   |           |           | 3.661E-02 | 1.948E-18 | 4.055E-02  |
| agricultural soil       | s2R  | 3.171E-01 |           |           | 4.783E-03 | 3.198E-01            | 1.357E-12   |           |           | 8.135E-02 | 3.429E-17 | 7.135E-01  |
| other soil              | s3R  | 0.000E+00 |           |           | 1.007E-04 | 1.567E-03            | 1.300E-14   |           |           | 1.356E-02 | 7.220E-19 | 1.502E-02  |
| Continental Scale       |      |           |           |           |           |                      |             |           |           |           |           |            |
| air                     | aC   | 0.000E+00 | 1.872E-01 | 3.322E-02 | 7.235E-06 |                      | 2.644E-28   | 1.540E-01 | 2.550E-15 |           |           |            |
| fresh water lakes       | w0C  | 0.000E+00 | 4.204E-04 | 4.204E-04 |           | 8.279E-05            | 7.120E-17   | 3.390E-04 | 2.620E-22 |           |           |            |
| fresh water             | w1C  | 3.171E-01 | 4.204E-04 | 1.270E+00 |           | 6.730E-02            | 7.090E-14   | 3.729E-03 | 8.697E-18 |           |           | 7.691E-01  |
| coastal sea water       | w2C  | 0.000E+00 | 7.298E+00 | 7.380E+00 |           | 8.176E-02            | 2.186E-14   | 5.932E-04 | 8.047E-19 |           |           |            |
| fresh water sediment    | sd1C |           |           |           | 2.646E-02 | 1.392E-01            | 3.712E-14   |           |           |           |           |            |
| coastal marine sediment | sd2C |           |           |           | 5.417E-04 | 6.534E-04            | 2.406E-15   |           |           |           |           |            |
| natural soil            | s1C  | 0.000E+00 |           |           | 2.718E-04 | 4.209E-03            | 3.508E-14   |           |           | 3.661E-02 | 1.948E-18 | 4.055E-02  |
| agricultural soil       | s2C  | 3.171E-01 |           |           | 4.783E-03 | 3.198E-01            | 1.357E-12   |           |           | 8.135E-02 | 3.429E-17 | 7.135E-01  |
| other soil              | s3C  | 0.000E+00 |           |           | 1.007E-04 | 1.567E-03            | 1.300E-14   |           |           | 1.356E-02 | 7.220E-19 | 1.502E-02  |

81

Steady-State Simulation Table 1 Table 2 Graphical Output of Scale Zone Compartments

### Graphical Output of Scale Zone Compartments

**Select Scale Zone**

- Regional: 3.834E+08 kg (0.00%) [Show](#)
- Continental: 3.426E+11 kg (0.14%) [Show](#)
- Moderate: 5.880E+13 kg (24.19%) [Show](#)
- Arctic: 1.450E+14 kg (59.65%) [Show](#)
- Tropical: 3.893E+13 kg (16.02%) [Show](#)

**Total Mass: 2.431E+14 kg**

### Graphical Output of Continental Scale Compartments

**Continental**

**Water Compartments:** Fresh water (w1C), Fresh water lakes (w0C), Coastal sea water (w2C)

**Soil Compartments:** Natural soil (s1C), Agriculture soil (s2C), Other soil (s3C)

**Sediment Compartments:** Fresh water sediment (sd1C), Coastal marine sediment (sd2C)

**Air (aC)**

**Masses (kg):**

- aC: 2.218E-08  $g\ m^{-3}$
- w0C: 1.890E-07  $g\ L^{-1}$
- w1C: 4.941E-06  $g\ L^{-1}$
- w2C: 4.889E-04  $g\ L^{-1}$
- sd1C: 1.521E-04  $g\ kg(w)^{-1}$
- sd2C: 1.340E-02  $g\ kg(w)^{-1}$
- s1C: 7.249E-05  $g\ kg(w)^{-1}$
- s2C: 4.029E-05  $g\ kg(w)^{-1}$
- s3C: 7.250E-05  $g\ kg(w)^{-1}$

**Masses (kg):**

- aC: 1.597E+05 kg (0.00%)
- w0C: 1.756E+05 kg (0.00%)
- w1C: 1.514E+06 kg (0.00%)
- w2C: 3.407E+11 kg (99.46%)
- sd1C: 6.059E+05 kg (0.00%)
- sd2C: 1.821E+09 kg (0.53%)
- s1C: 6.179E+06 kg (0.00%)
- s2C: 3.053E+07 kg (0.01%)
- s3C: 2.289E+06 kg (0.00%)

82

84 **Figure S6.** The output window of the Steady-State Simulation in *SimpleBox4nano* presenting a summary of the steady-state simulation results, including a brief description of the steady-state  
 85 calculations, Table 1 that presents the calculated steady-state concentrations, fugacities, emissions and mass, Table 2 that presents Steady-state mass flows for D species only ( $kg\ s^{-1}$ ) and  
 86 Graphical Output of Scale Zone Compartments that visualizes the mass distribution across different scales and compartments. Users can export both Table 1 and Table 2.

87

### Dynamic Simulation (Time-Dependent Simulation)

**Objective:** To study how the chemical mass evolves over time in each environmental compartment, while emissions are constant.

**Mathematical Basis:** The dynamic behaviour is modelled using the following first order differential equation:

$$\frac{dM(t)}{dt} = \mathbf{K} \cdot \mathbf{M}(t) + \mathbf{E}$$

where:

**K** (s<sup>-1</sup>) is the matrix of transfer rate coefficients between compartments,

**M(t)** (kg) is the vector of masses (or fugacities) in compartments at time *t*,

**E** (kg s<sup>-1</sup>) is the vector of constant emission rates

The system experiences continuous inflow (constant emissions) and outflows (due to inter-compartment transfer and degradation). Over time, the mass in each compartment approaches a steady state. The system of differential equations is solved numerically using 4th order Runge-Kutta method for capturing how the system moves from an initial state (e.g., zero mass) toward the steady state.

#### Graphical Output of Scale Zone Compartments

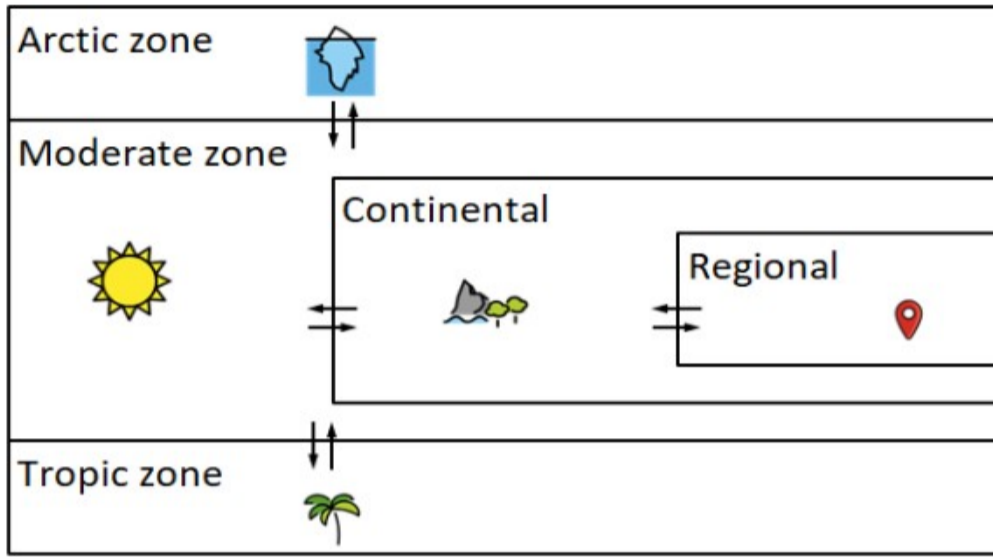

- Regional [Show](#)
- Continental [Show](#)
- Moderate [Show](#)
- Arctic [Show](#)
- Tropical [Show](#)

89

#### Graphical Output of Regional Scale Compartments

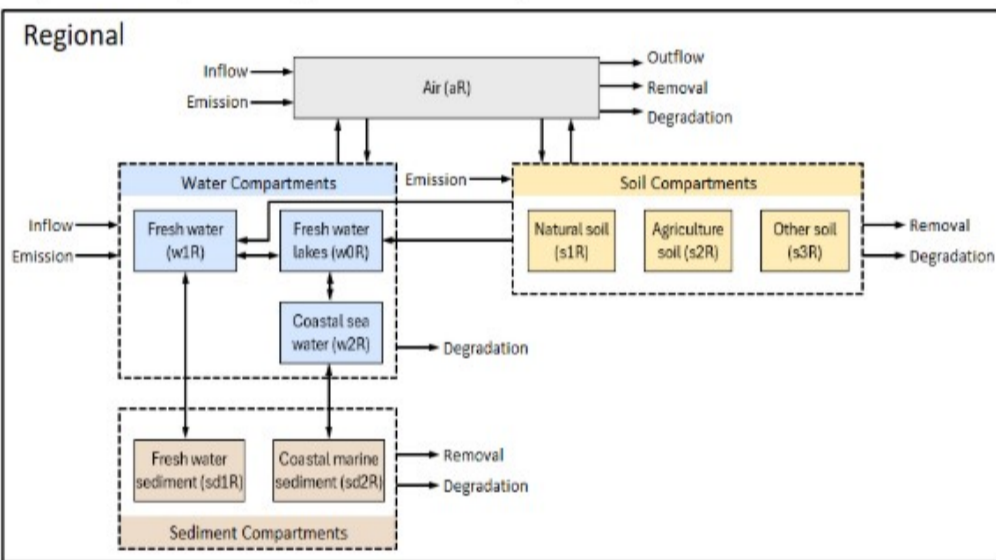

- |       |       |       |       |       |       |       |       |       |      |
|-------|-------|-------|-------|-------|-------|-------|-------|-------|------|
| aRG   | aRS   | aRA   | aRP   | cwRS  | cwRA  | cwRP  | w0RD  | w0RS  | w0RA |
| w0RP  | w1RD  | w1RS  | w1RA  | w1RP  | w2RD  | w2RS  | w2RA  | w2RP  |      |
| sd0RD | sd0RS | sd0RA | sd0RP | sd1RD | sd1RS | sd1RA | sd1RP | sd2RD |      |
| sd2RS | sd2RA | sd2RP | s1RD  | s1RS  | s1RA  | s1RP  | s2RD  | s2RS  |      |
| s2RA  | s2RP  | s3RD  | s3RS  | s3RA  | s3RP  |       |       |       |      |

#### Time needed to reach equilibrium (steady-state) in the Regional scale:

- aRG reaches equilibrium (steady-state) at 6.0 days
- aRS reaches equilibrium (steady-state) at 4.0 days
- aRA reaches equilibrium (steady-state) at 21.0 days
- aRP reaches equilibrium (steady-state) at 5.0 days
- cwRS reaches equilibrium (steady-state) at 5.0 days
- cwRA reaches equilibrium (steady-state) at 22.0 days
- cwRP reaches equilibrium (steady-state) at 5.0 days
- w0RD reaches equilibrium (steady-state) at 2268.0 days
- w0RS reaches equilibrium (steady-state) at 5.0 days

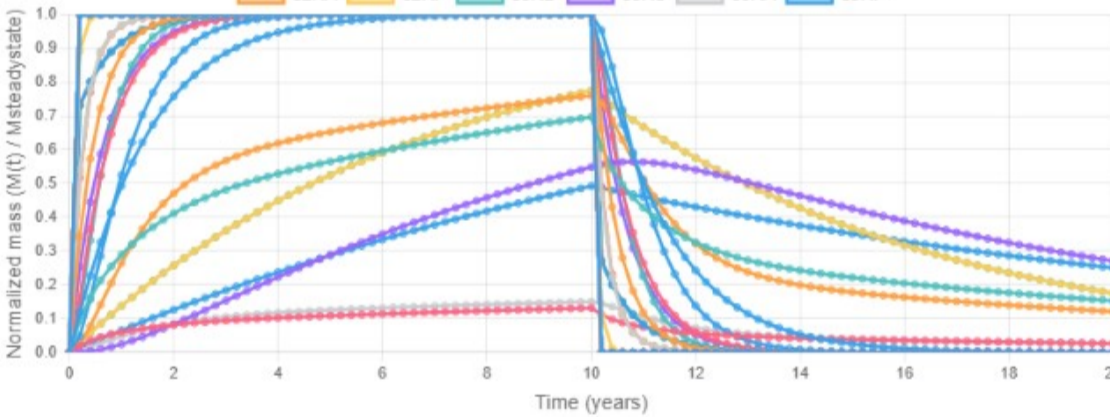

90

91

92

93

**Figure S7.** The output window of the Dynamic Simulation in *SimpleBox4nano* web application, presenting a brief description of the quasi-dynamic simulation calculation and presenting a graphical representation of mass distribution across different scales. Users can select a specific scale using the 'Show' button to visualize the dynamic evolution of mass, normalized by the steady-state mass, as a function of time.

94

95 S6. Output window after selecting ‘Calculate Fate Factors’

Calculate Fate Factor (FF) in days Back

$$FF_{i,j} = \frac{m_j(t)}{\dot{m}_i}$$

Where:  
 $m_j(t)$  is the dynamic mass in receiving compartment  $j$  at time  $t$ .  
 $\dot{m}_i$  is the emission mass flow (kg/day) from the single Continental emission compartment  $i$ .

Substance:

Landscape:

Emission Compartment:

Number of years:

| Fate Factor in days   |                |
|-----------------------|----------------|
| Receiving Compartment | Number of Days |
| Air                   | 5.3            |
| Fresh water lake      | 2.9            |
| Fresh water           | 14.4           |
| Coastal sea water     | 158.1          |
| Natural soil          | 60.7           |
| Agricultural soil     | 241.9          |
| Other soil            | 22.5           |

Calculate

96

97 **Figure S8.** Output of the ‘Calculate Fate Factors’ function in the *SimpleBox4nano* web application. Computation is only enabled  
 98 under continental-scale scenarios with a single specified emission compartment. Users may also define a custom time (in years)  
 99 to analyze the fate behavior over a relevant temporal scale.

100 S7. REST APIs

The screenshot shows a REST client interface. At the top, the URL `https://enaloscloud.novamechanics.com/insight/apis/simplebox4nano/results/` is displayed. Below the URL, the HTTP method is set to `POST`. The request body is a JSON object with the following structure:

```
1  {
2    "substance": "nanoparticle",
3    "scenario": "default scenario",
4    "e_w0RS": 1000,
5    "e_w1RS": 0,
6    "e_w2AS": 0,
7    "e_w2RD": 0,
8    "e_aCG": 0,
9    "e_s3RS": 0,
10   "e_w1CS": 0,
11   "e_w2MD": 0,
12   "e_aAG": 0,
13   "e_w2AD": 0,
14   "e_w0CD": 0,
15   "e_sAS": 0,
16   "e_sAD": 0,
17   "e_w0CS": 0,
18   "e_aTG": 0,
19   "e_s1CD": 0,
20   "e_w2CS": 0,
21   "e_w1RD": 0,
22   "e_w2MS": 0,
23   "e_sMD": 0,
24   "e_aCS": 0,
25   "e_sMS": 0,
26   "e_sTS": 0,
27   "e_aRS": 0,
28   "e_s3CS": 0,
29   "e_w1CD": 0,
30   "e_w2CD": 0,
31   "e_s2RS": 0,
32   "e_s1CS": 0,
```

101

```
33 "e_s2CD": 0,  
34 "e_w2RS": 0,  
35 "e_s2CS": 0,  
36 "e_s1RS": 0,  
37 "e_w0RD": 0,  
38 "e_aMS": 0,  
39 "e_s1RD": 0,  
40 "e_aTS": 0,  
41 "e_sTD": 0,  
42 "e_w2TD": 0,  
43 "e_w2TS": 0,  
44 "e_aAS": 0,  
45 "e_aRG": 0,  
46 "e_s3CD": 0,  
47 "e_aMG": 0,  
48 "e_s2RD": 0,  
49 "e_s3RD": 0  
50 }
```

102

Body Cookies Headers (7) Test Results

Pretty Raw Preview Visualize JSON 

```
75 [  
76   "Dissolved/Gas species (G/D)",  
77   "1.65E-13",  
78   "0.0%",  
79   "8.30E-12",  
80   "0.0%",  
81   "2.73E-10",  
82   "0.0%",  
83   "1.19E-11",  
84   "0.0%",  
85   "4.98E-09",  
86   "0.0%",  
87   "7.18E-25",  
88   "1.15E-24",  
89   "3.52E-24",  
90   "2.81E-25",  
91   "3.91E-23",  
92   "g.m-3",  
93   "2.60E-23",  
94   "4.18E-23",  
95   "1.28E-22",  
96   "9.39E-24",  
97   "1.48E-21"  
98 ],
```

103

104  
105

**Figure S9.** Using Postman to test the functionality of a 'POST' request for the endpoint <https://enaloscloud.novamechanics.com/insight/apis/simplebox4nano/results/>, including input data and response validation.

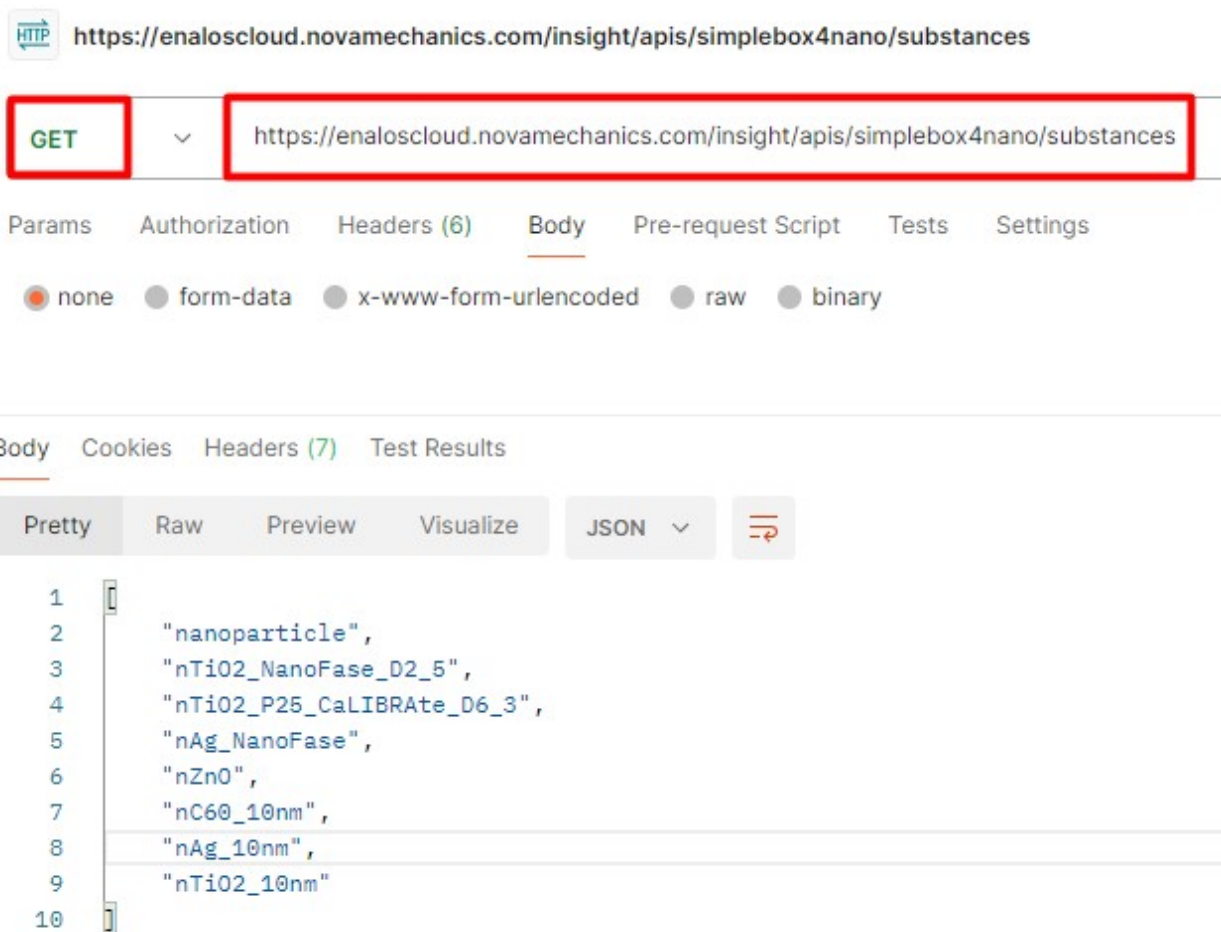

106  
107  
108  
109

**Figure S10.** Using Postman to test the functionality of a 'GET' request for the endpoint <https://enaloscloud.novamechanics.com/insight/apis/simplebox4nano/substances>, verifying the request parameters and the expected response.

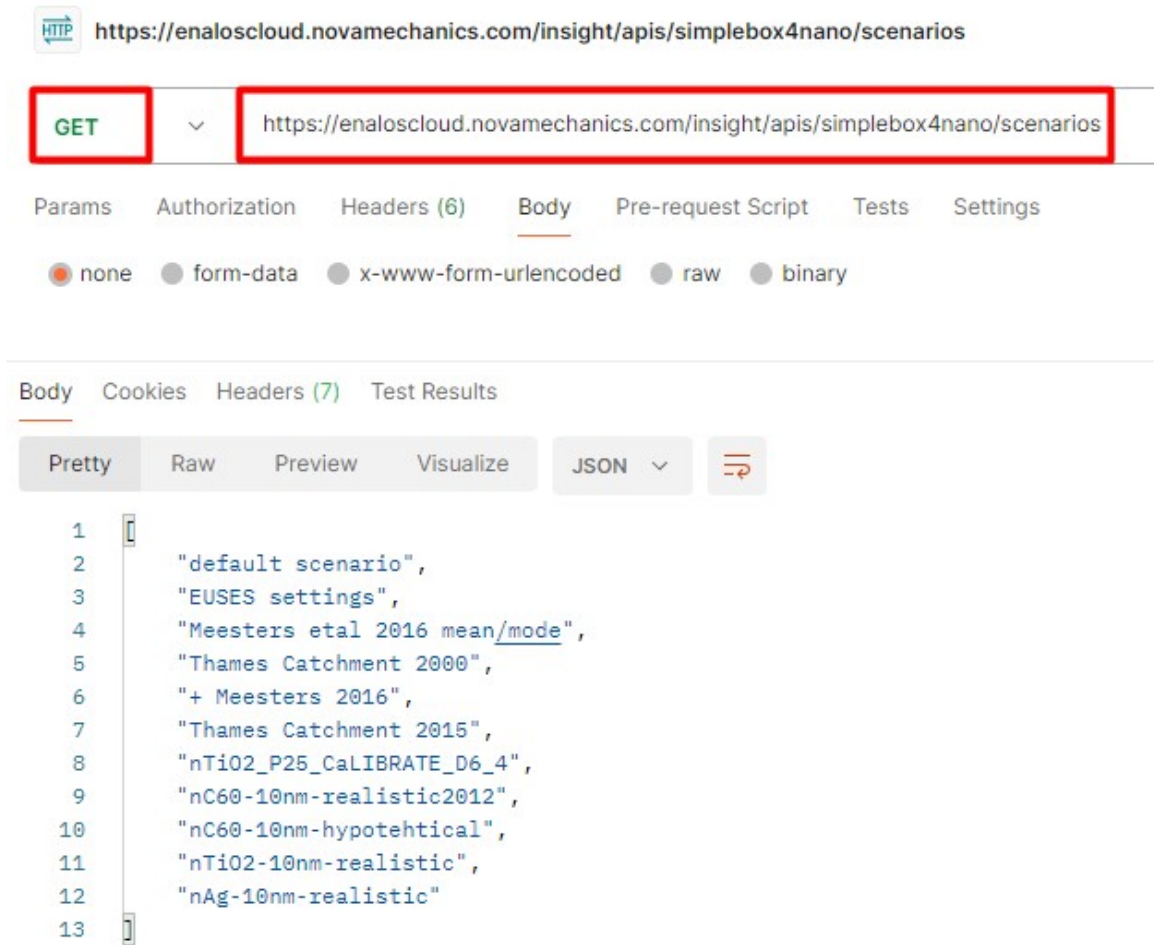

110

111

112

113

**Figure S11.** Using Postman to test the functionality of a 'GET' request for the endpoint <https://enaloscloud.novamechanics.com/insight/apis/simplebox4nano/scenarios>, verifying the request parameters and the expected response.

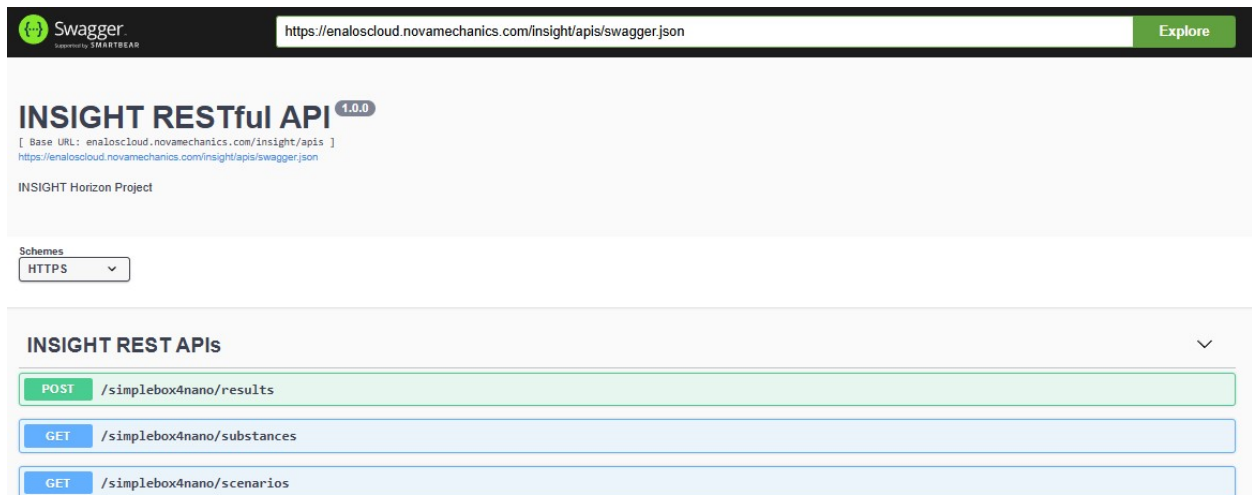

114

115

116

117

**Figure S12.** Snapshot of the Swagger/OpenAPI interface for the *SimpleBox4nano* RESTful API hosted on the Enalos Cloud platform. The interface documents the available POST and GET endpoints and allows interactive inspection and testing of API requests and responses.

118 **S8. Environmental fate modelling – *SimpleBox4Planet* vs. *SimpleBox4nano***

**Choose Nanomaterial**

Nanomaterial Substance

**Substance Properties**

|                              |                                            |                               |                                    |                                                 |                                            |                                |                                    |
|------------------------------|--------------------------------------------|-------------------------------|------------------------------------|-------------------------------------------------|--------------------------------------------|--------------------------------|------------------------------------|
| CAS                          | <input type="text"/>                       | ChemClass                     | <input type="text" value="Nano"/>  | Molecular Weight [g.mol <sup>-1</sup> ]         | <input type="text" value="65.38"/>         |                                |                                    |
| RadS [nm]                    | <input type="text" value="35.6428571428"/> | RhoS [kg.m-3]                 | <input type="text" value="5850"/>  | AHamakerSP.w [J]                                | <input type="text" value="1.69571428571"/> | Tm [°C]                        | <input type="text" value="420"/>   |
| pKa [-]                      | <input type="text" value="7"/>             | Pvap25 [Pa]                   | <input type="text" value="1e-20"/> | Sol25 [mg.L <sup>-1</sup> ]                     | <input type="text" value="1e-20"/>         | Kaw [-]                        | <input type="text" value="1e-20"/> |
| Kow [-]                      | <input type="text" value="2750"/>          | Ksw [-]                       | <input type="text" value="50"/>    | Kdeg(air) [s <sup>-1</sup> ]                    | <input type="text" value="1e-20"/>         | Kdeg(water) [s <sup>-1</sup> ] | <input type="text" value="1e-20"/> |
| Kdeg(sed) [s <sup>-1</sup> ] | <input type="text" value="1e-20"/>         | Kdeg(soil) [s <sup>-1</sup> ] | <input type="text" value="1e-20"/> | <input type="button" value="Show More Fields"/> |                                            |                                |                                    |

119

120

121

**Figure S13.** Physicochemical properties of nanoparticle used in the *SimpleBox4nano* web application to simulate its environmental fate and transport.

122 **S8.1 Emissions of dissolved species in water (at the moderate scale zone)**

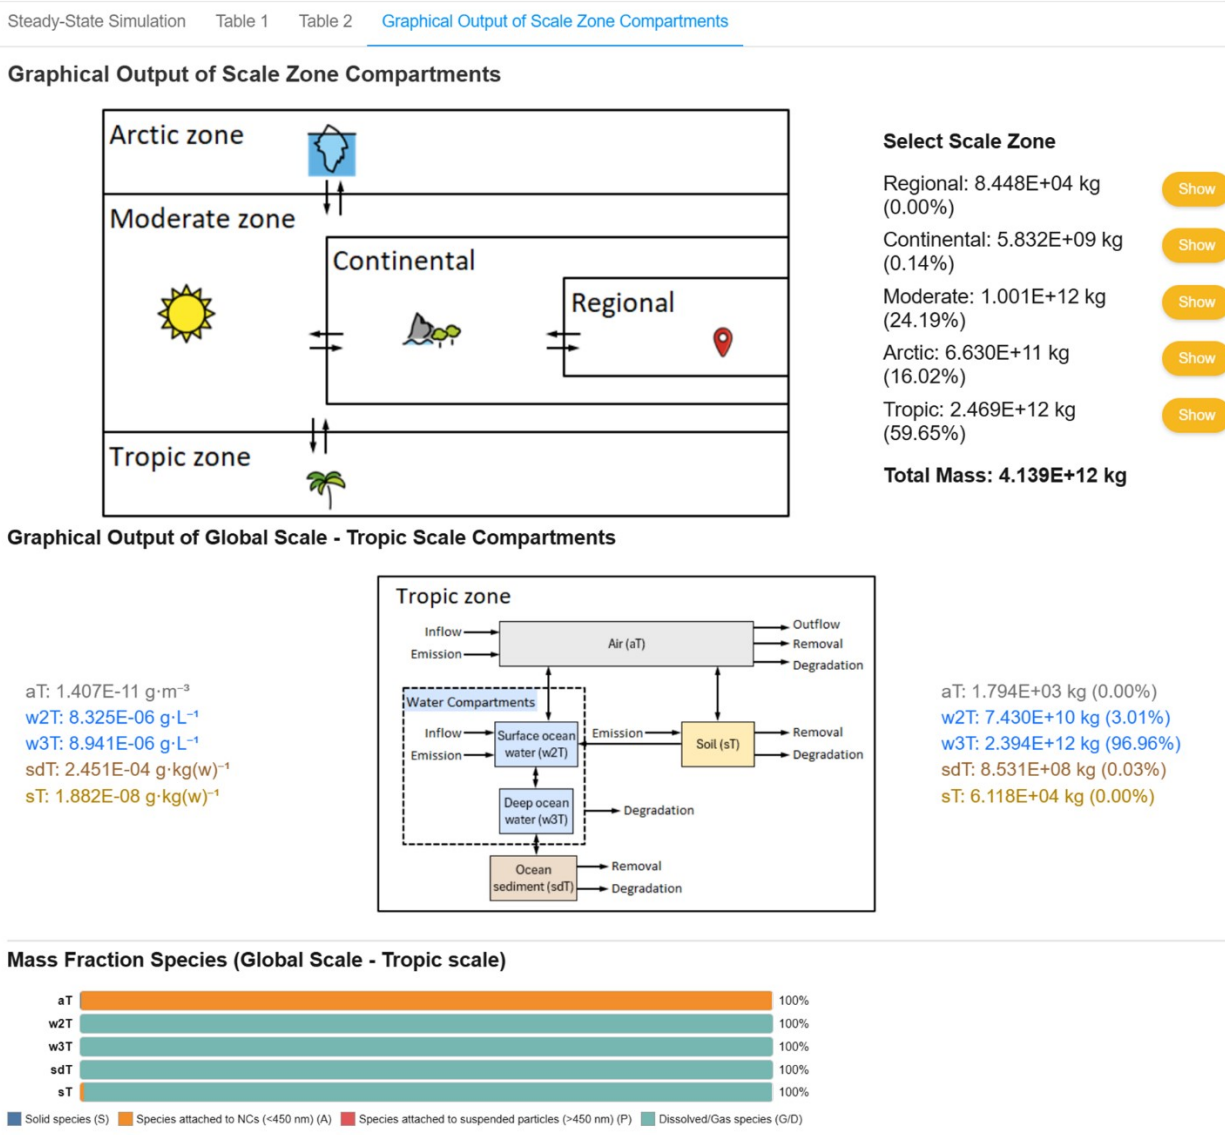

123  
124  
125  
126  
127  
128

**Figure S14.** Graphical output of the steady-state mass of nanoparticle as generated from *SimpleBox4nano* web application per scale zone for solid-species emission to water (1000 t y<sup>-1</sup>) applied at the moderate (global-scale) zone. The figure reports (top) the steady-state mass distribution across scale zones, (middle) the corresponding mass distribution among tropic-zone compartments (aT, w2T, w3T, sdT, sT) together with the associated compartmental concentrations, and (bottom) the mass fraction of species (S, A, P, G/D) at the tropic scale.

Calculate Fate Factor (FF) in days

Back

$$FF_{i,j} = \frac{m_j(t)}{\dot{m}_i}$$

Where:

$m_j(t)$  is the dynamic mass in receiving compartment  $j$  at time  $t$ .

$\dot{m}_i$  is the emission mass flow (kg/day) from the single Continental emission compartment  $i$ .

Substance

Landscape

Emission Compartment:

Number of years

| Fate Factor in days   |                |
|-----------------------|----------------|
| Receiving Compartment | Number of Days |
| Air                   | 0.0            |
| Fresh water lake      | 0.0            |
| Fresh water           | 0.0            |
| Coastal sea water     | 437.8          |
| Natural soil          | 0.0            |
| Agricultural soil     | 0.0            |
| Other soil            | 0.0            |

Calculate

129

130 **Figure S15.** Fate factor (FF, days) graphical output generated by the *SimpleBox4nano* web application for the default engineered  
131 nanomaterial, calculated over a 100-year simulation horizon for solid-species emission to continental sea water ( $1000 \text{ t}\cdot\text{y}^{-1}$ ). The  
132 interface reports the compartment-specific fate factors (in days) for receiving compartments (air, fresh water lake, fresh water,  
133 coastal sea water, natural soil, agricultural soil, other soil).

134

135 **S8.2 Emissions of dissolved species in soil (at the moderate scale zone)**

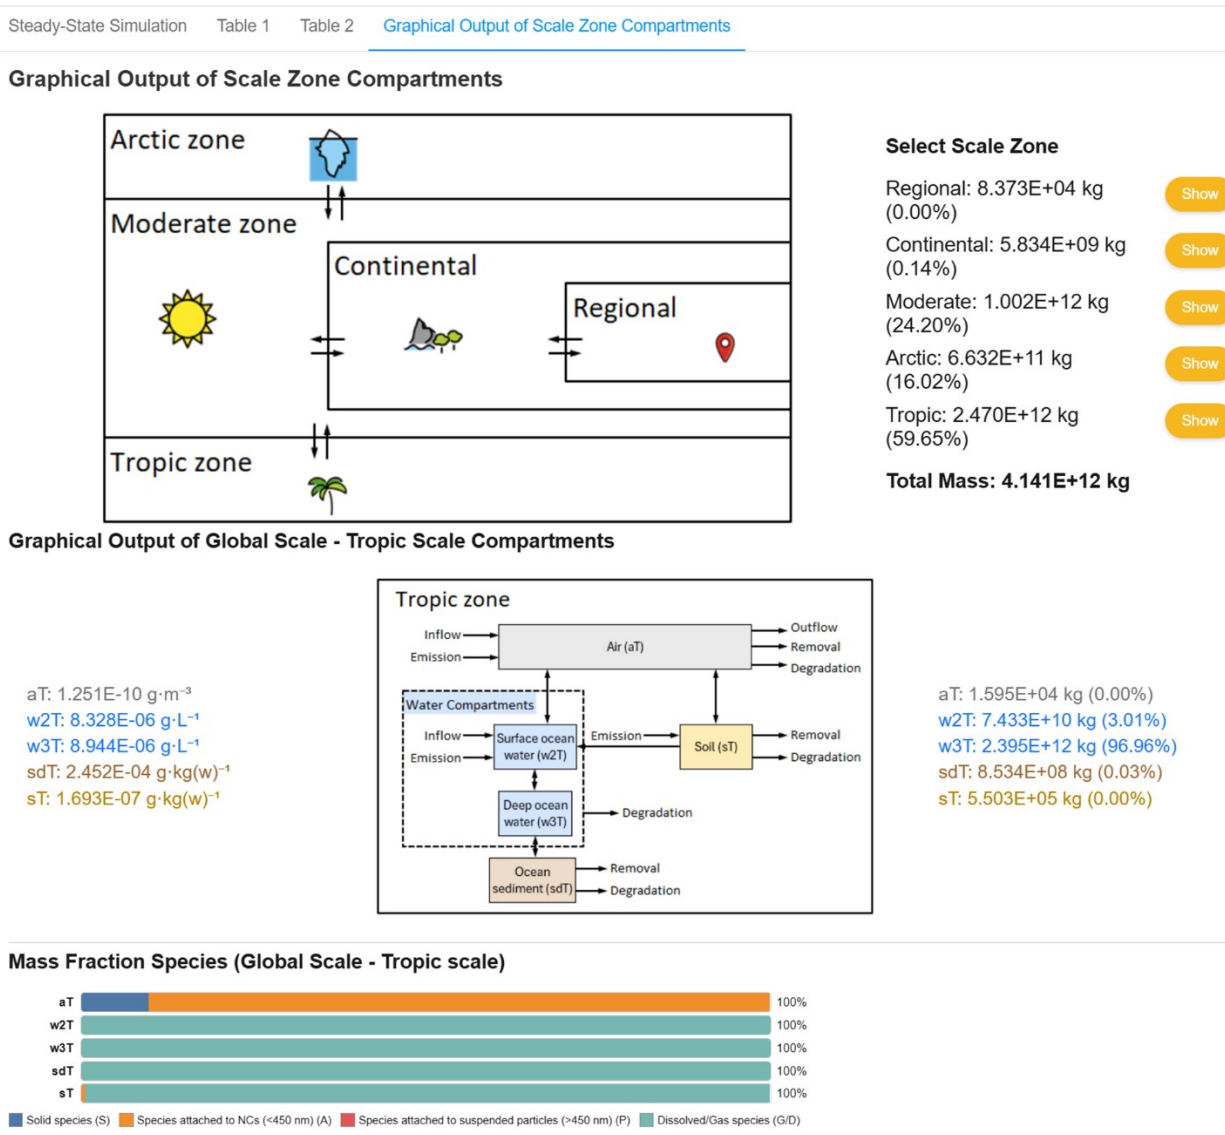

136  
137  
138  
139  
140  
141  
142

**Figure S16.** Graphical output of the steady-state mass of nanoparticle as generated from *SimpleBox4nano* web application per scale zone for solid-species emission to soil (1000 t y<sup>-1</sup>) applied at the moderate (global-scale) zone. The figure reports (top) the steady-state mass distribution across scale zones, (middle) the corresponding mass distribution among tropic-zone compartments (aT, w2T, w3T, sdT, sT) together with the associated compartmental concentrations, and (bottom) the mass fraction of species (S, A, P, G/D) at the tropic scale.

$$FF_{i,j} = \frac{m_j(t)}{\dot{m}_i}$$

Where:

$m_j(t)$  is the dynamic mass in receiving compartment  $j$  at time  $t$ .

$\dot{m}_i$  is the emission mass flow (kg/day) from the single Continental emission compartment  $i$ .

Substance

Landscape

Emission Compartment: Natural soil

Number of years

| Fate Factor in days   |                |
|-----------------------|----------------|
| Receiving Compartment | Number of Days |
| Air                   | 0.0            |
| Fresh water lake      | 0.0            |
| Fresh water           | 155.8          |
| Coastal sea water     | 424.6          |
| Natural soil          | 2,311.8        |
| Agricultural soil     | 0.0            |
| Other soil            | 0.0            |

Calculate

143  
144  
145  
146  
147

**Figure S17.** Fate factor (FF, days) graphical output generated by the *SimpleBox4nano* web application for the default engineered nanomaterial, calculated over a 100-year simulation horizon for solid-species emission to continental natural soil ( $1000 \text{ t}\cdot\text{y}^{-1}$ ). The interface reports the compartment-specific fate factors (in days) for receiving compartments (air, fresh water lake, fresh water, coastal sea water, natural soil, agricultural soil, other soil).

148

## 149 S9. Sensitivity Exploration (selection of lower and upper bounds)

150 The nanoparticle radius range (1-100 nm) aligns with the commonly adopted size range for  
151 nanomaterials, while also matching typical primary particle sizes observed in microscopy and DLS  
152 characterisation of commercially relevant ENMs.<sup>1</sup> The density range (900-30 000 kg m<sup>-3</sup>) is chosen to cover  
153 low-density organic and polymeric ENMs and extend to very dense metals and alloys, thereby allowing the  
154 model to represent both buoyant and strongly settling particles in different compartments.<sup>2</sup> The acid  
155 dissociation constant ( $pK_a$ ) interval (-2 to 14) captures the full range of strongly acidic sulfonic/sulfate  
156 functional groups used on oxide or latex nanoparticles<sup>3</sup> through to highly basic guanidinium- and amine-  
157 rich coatings employed on AuNPs, liposomes and polymeric carriers.<sup>4</sup> The melting temperature ( $T_m$ ) range  
158 (15-4000 °C) reflects the diversity of ENMs from low-melting organic/polymeric nanoobjects to refractory  
159 metal oxides and high-temperature ceramics used in catalysis or coatings.<sup>5</sup> Partition properties ( $K_{aw}$ ,  $K_{ow}$ ,  
160  $K_{sw}$ ,  $P_{vap}$  and Sol) are primarily relevant for dissolved or molecular species that arise from ENM  
161 transformation (e.g. metal ions, small organic ligands, degradation products). The ranges in Table 1 are  
162 selected to be at least as wide as those employed in previous multimedia fate assessments of organic  
163 chemicals, ensuring that hydrophilic, amphiphilic and highly hydrophobic transformation products can be  
164 represented within a single unified parameter space.<sup>6-8</sup> The Hamaker constant range (10<sup>-21</sup>-10<sup>-19</sup> J) is  
165 consistent with experimentally and theoretically derived values for metal oxides, metals and carbonaceous  
166 particles in water, which typically lie in the 10<sup>-21</sup>-10<sup>-19</sup> J interval depending on medium composition and  
167 surface coatings.<sup>9</sup> Kinetic parameters (transformation, degradation and dissolution constants) are  
168 deliberately defined over several orders of magnitude to cover extremely persistent ENMs, such as inert  
169 oxides, as well as rapidly transforming or dissolving materials (e.g. sulfidising Ag NPs or readily dissolving  
170 ZnO).<sup>10</sup> Attachment efficiencies between 10<sup>-10</sup> and 1 reflect the wide range of aggregation behaviours  
171 observed for ENMs interacting with natural colloids or suspended solids, where electrostatic and steric  
172 stabilisation can suppress attachment far below unity.<sup>11</sup>

173

174 S10. Halton Design

175 S10.1 Total mass of D-species, S-species, A-species, P-species

176 S10.1.1 Air

177 S10.1.1.1 Dissolved/Gas species

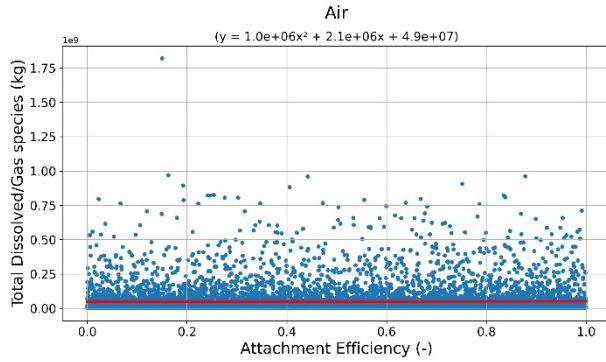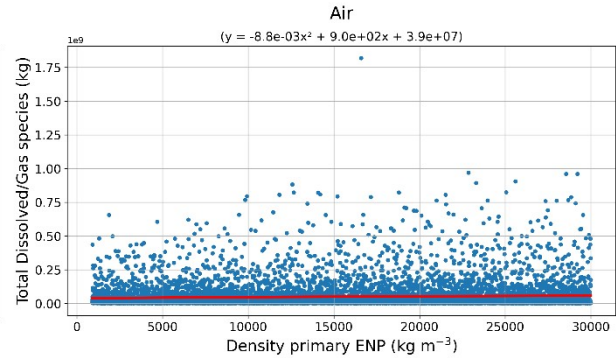

178

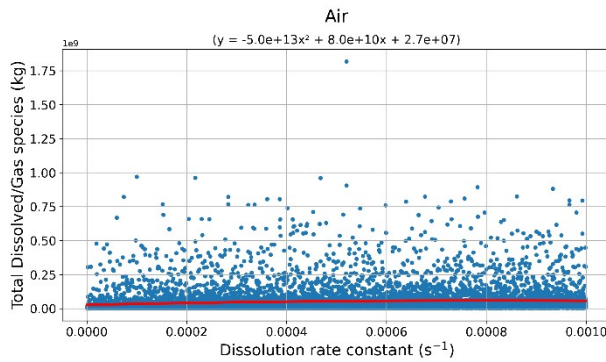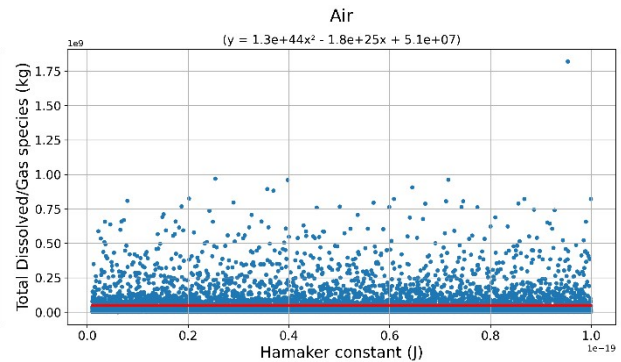

179

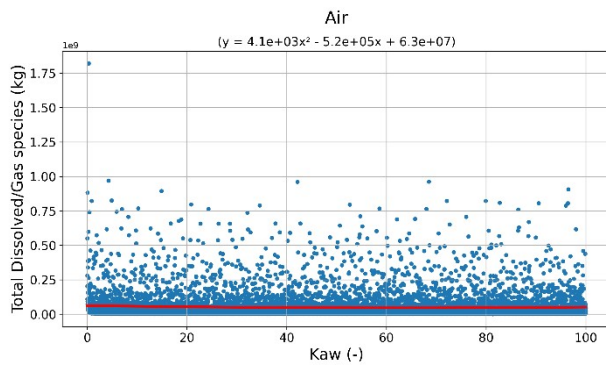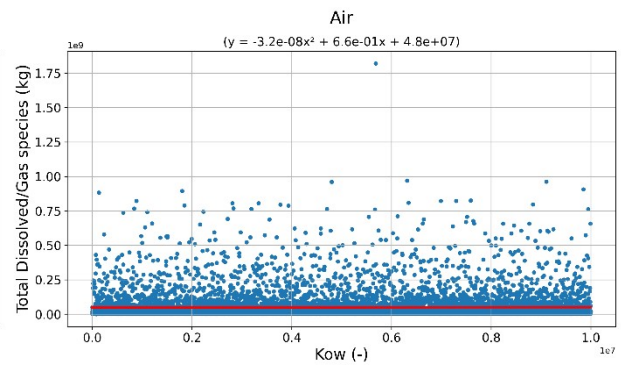

180

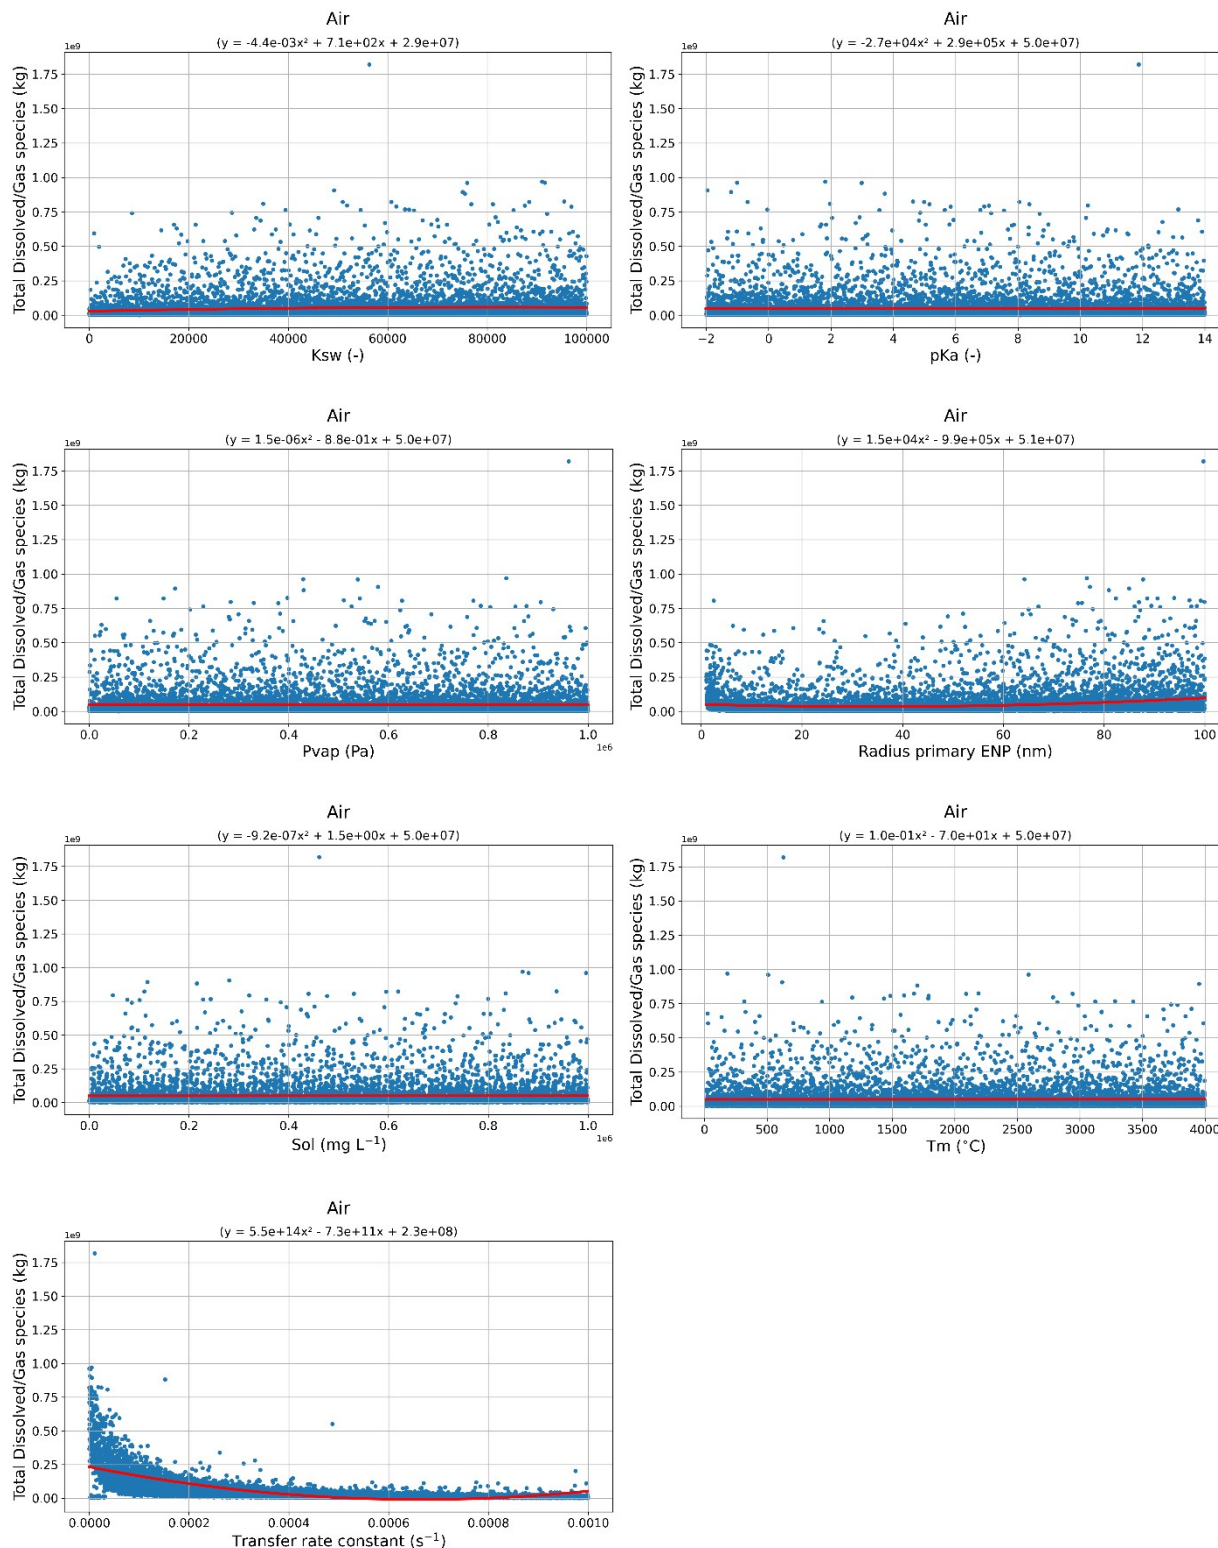

181

182

183

184

185

186

187

188

189

**Figure S18.** Scatter plots of the 10,000 simulation outputs generated with the *SimpleBox4nano* web application for the dissolved/gas species (D-species) under the solid-species emission scenario ( $1000 \text{ t y}^{-1}$ ) to the air compartment at the moderate (global-scale) zone. Each panel corresponds to one of the 13 physicochemical parameters (x-axis), plotted against the resulting total dissolved/gas mass (kg) at steady state (y-axis). Fitted second-order polynomial curves are included in each panel to provide an initial visual indication of non-linear trends.

190 **S10.1.1.2 Total Solid species**

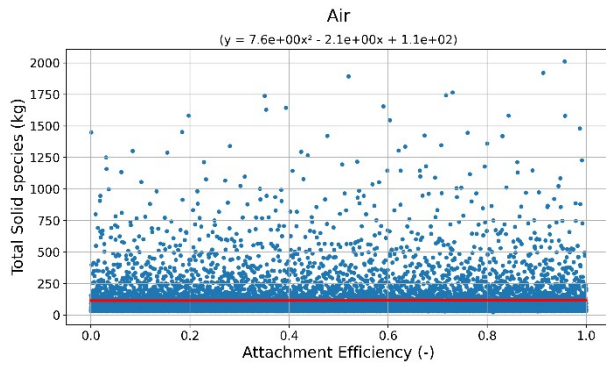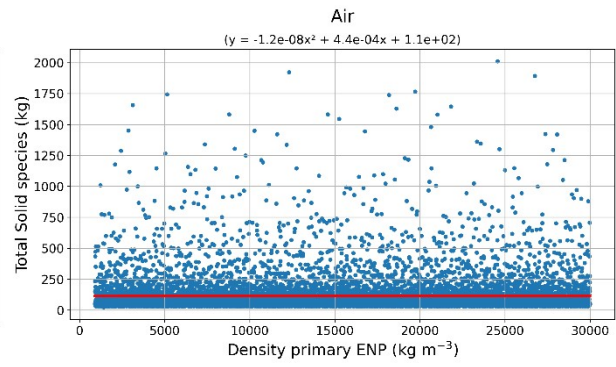

191

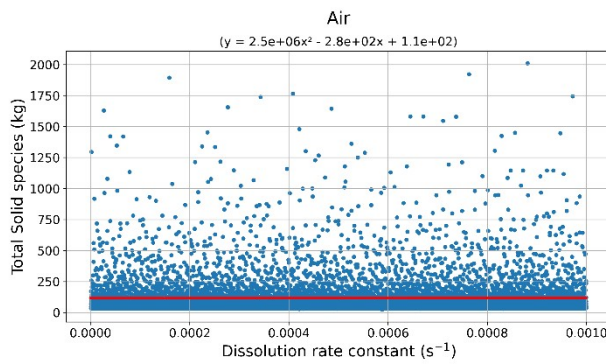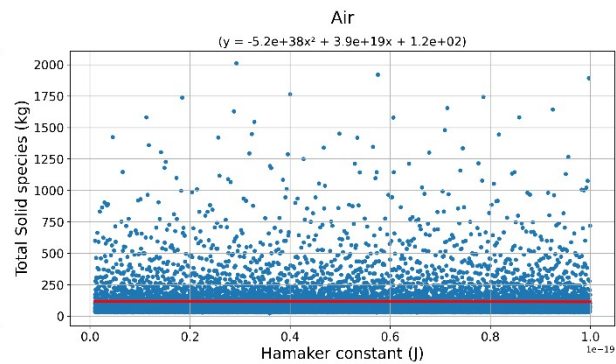

192

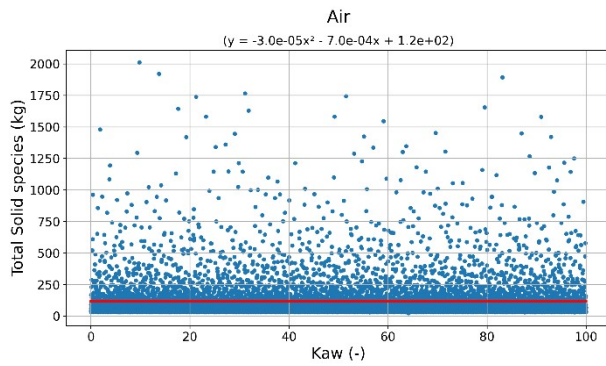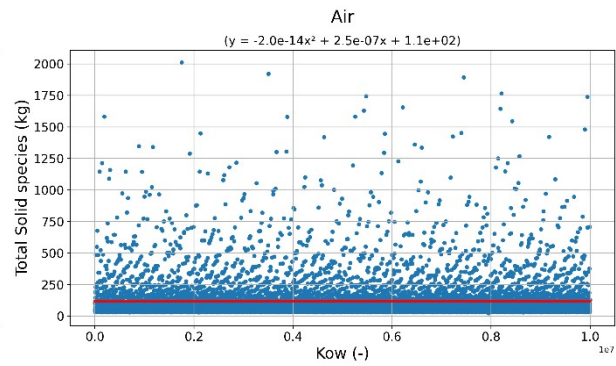

193

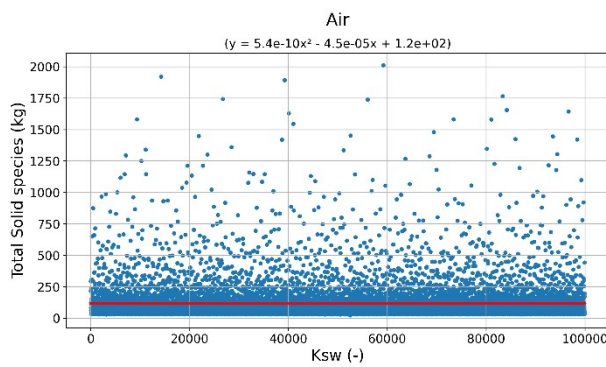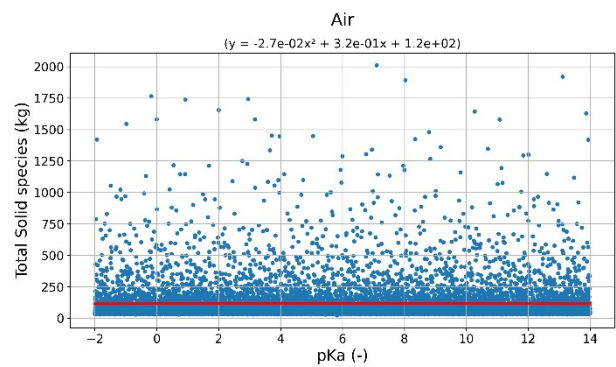

194

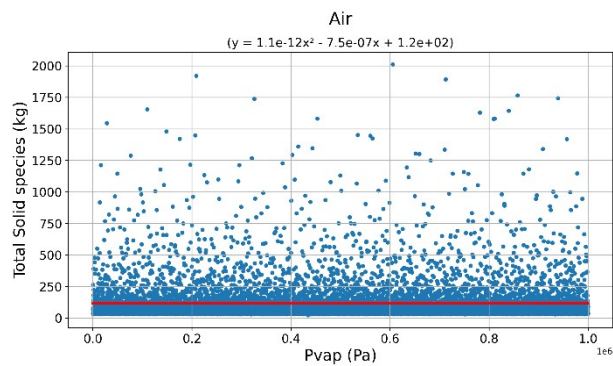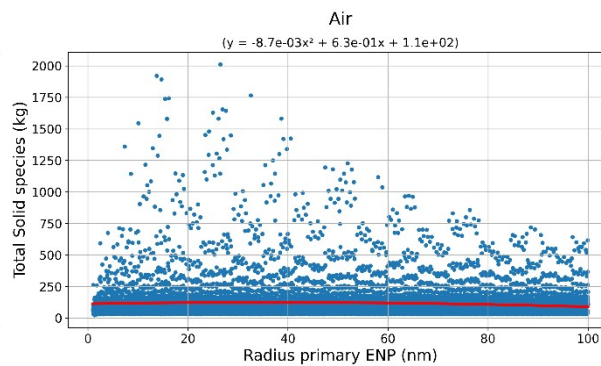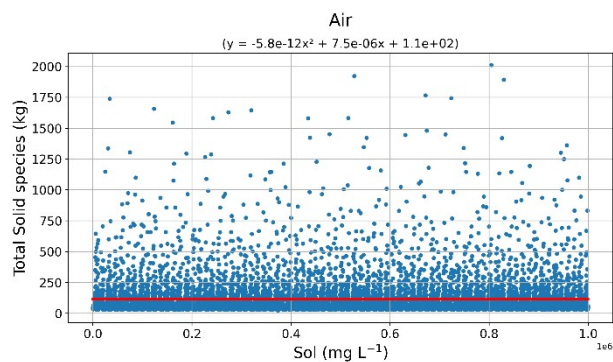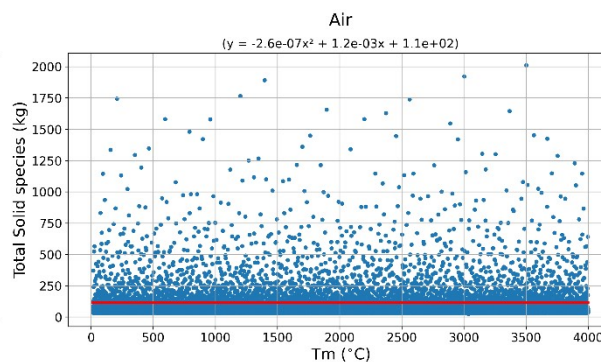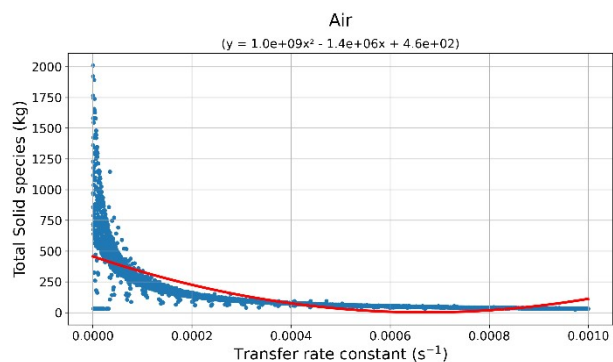

195

196

197

198 **Figure S19.** Scatter plots of the 10,000 simulation outputs generated with the *SimpleBox4nano* web application for the solid  
 199 species (S-species) under the solid-species emission scenario (1000 t y<sup>-1</sup>) to the air compartment at the moderate (global-scale)  
 200 zone. Each panel corresponds to one of the 13 physicochemical parameters (x-axis), plotted against the resulting total  
 201 dissolved/gas mass (kg) at steady state (y-axis). Fitted second-order polynomial curves are included in each panel to provide an  
 202 initial visual indication of non-linear trends.

203

204 **S10.1.1.3 Total species attached to NCs (< 450 nm)**

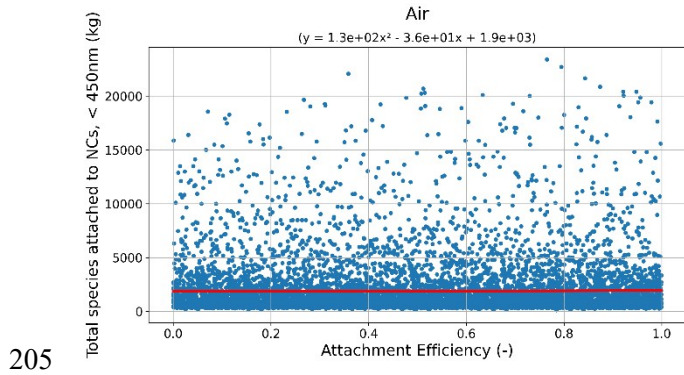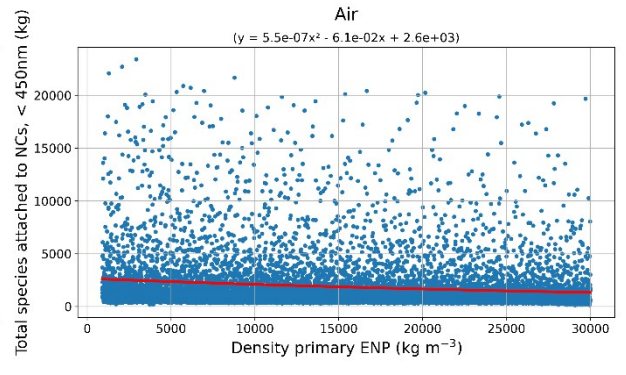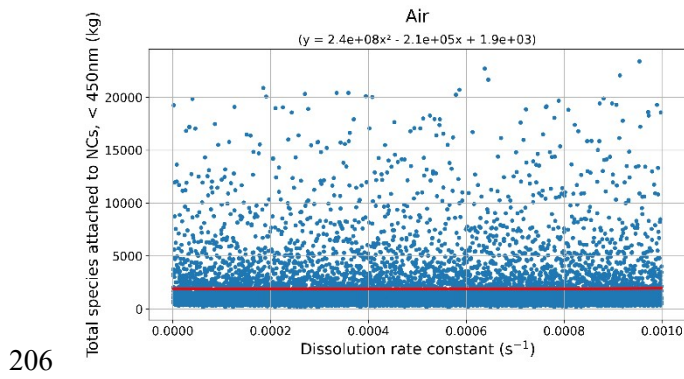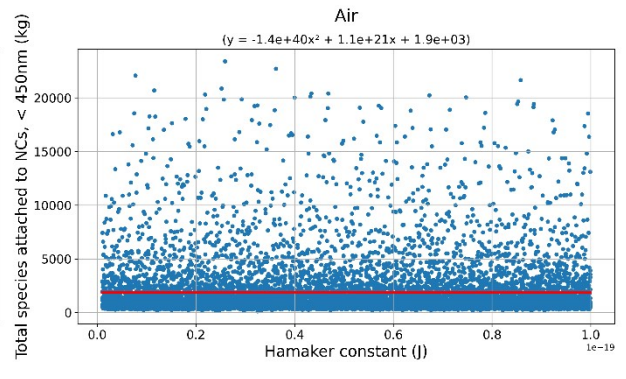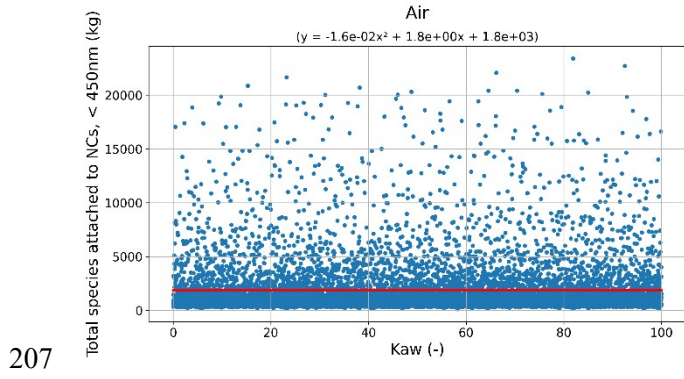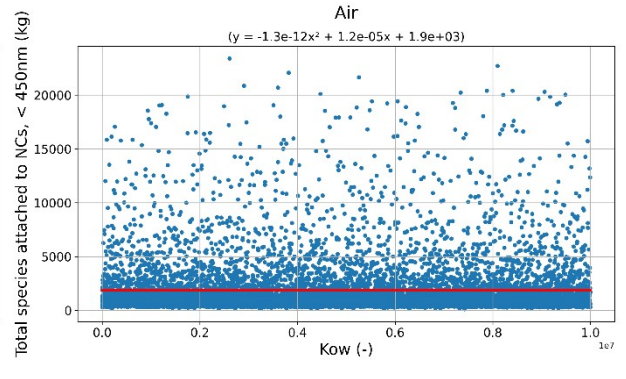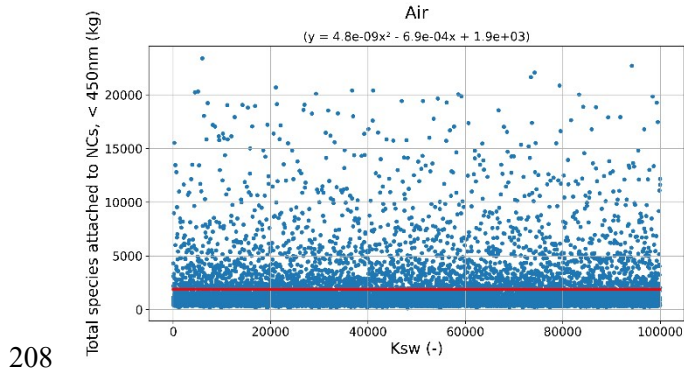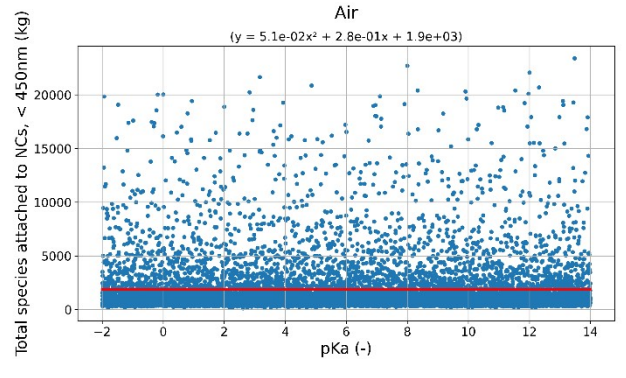

209

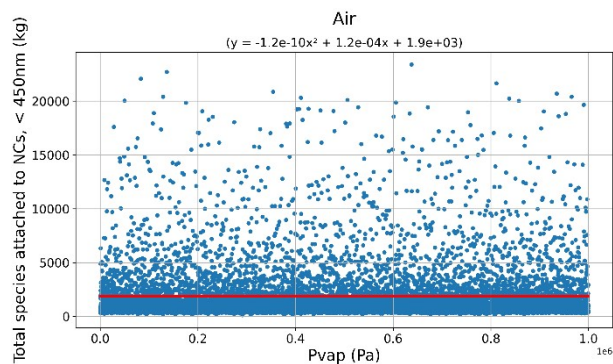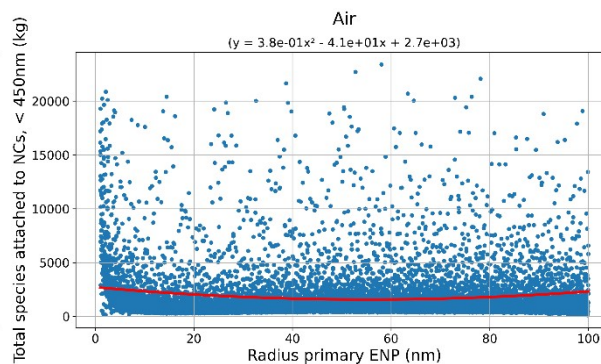

210

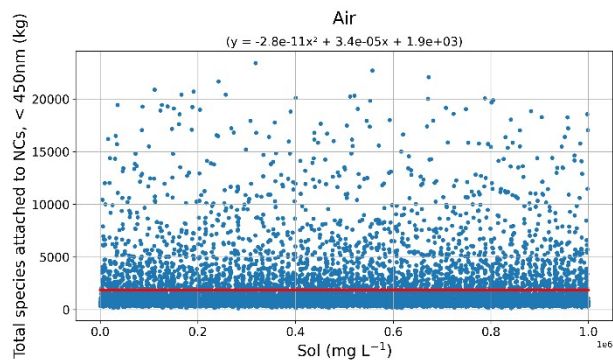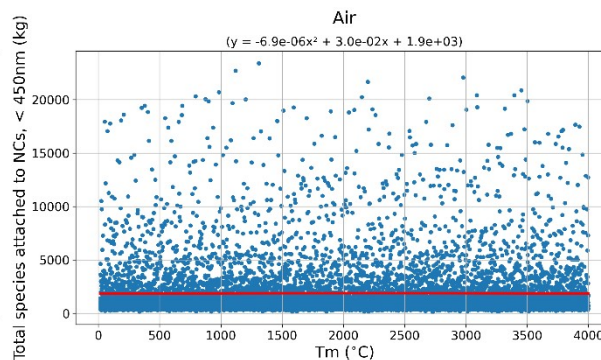

211

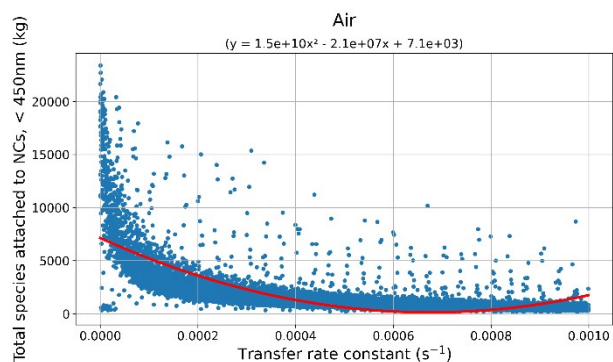

212

213 **Figure S20.** Scatter plots of the 10,000 simulation outputs generated with the *SimpleBox4nano* web application for the hetero-  
 214 aggregated species attached to natural colloids (< 450 nm) (A) under the solid-species emission scenario ( $1000 \text{ t y}^{-1}$ ) to the air  
 215 compartment at the moderate (global-scale) zone. Each panel corresponds to one of the 13 physicochemical parameters (x-axis),  
 216 plotted against the resulting total dissolved/gas mass (kg) at steady state (y-axis). Fitted second-order polynomial curves are  
 included in each panel to provide an initial visual indication of non-linear trends.

217

218 **S10.1.1.4 Total species attached to suspended particles (> 450 nm)**

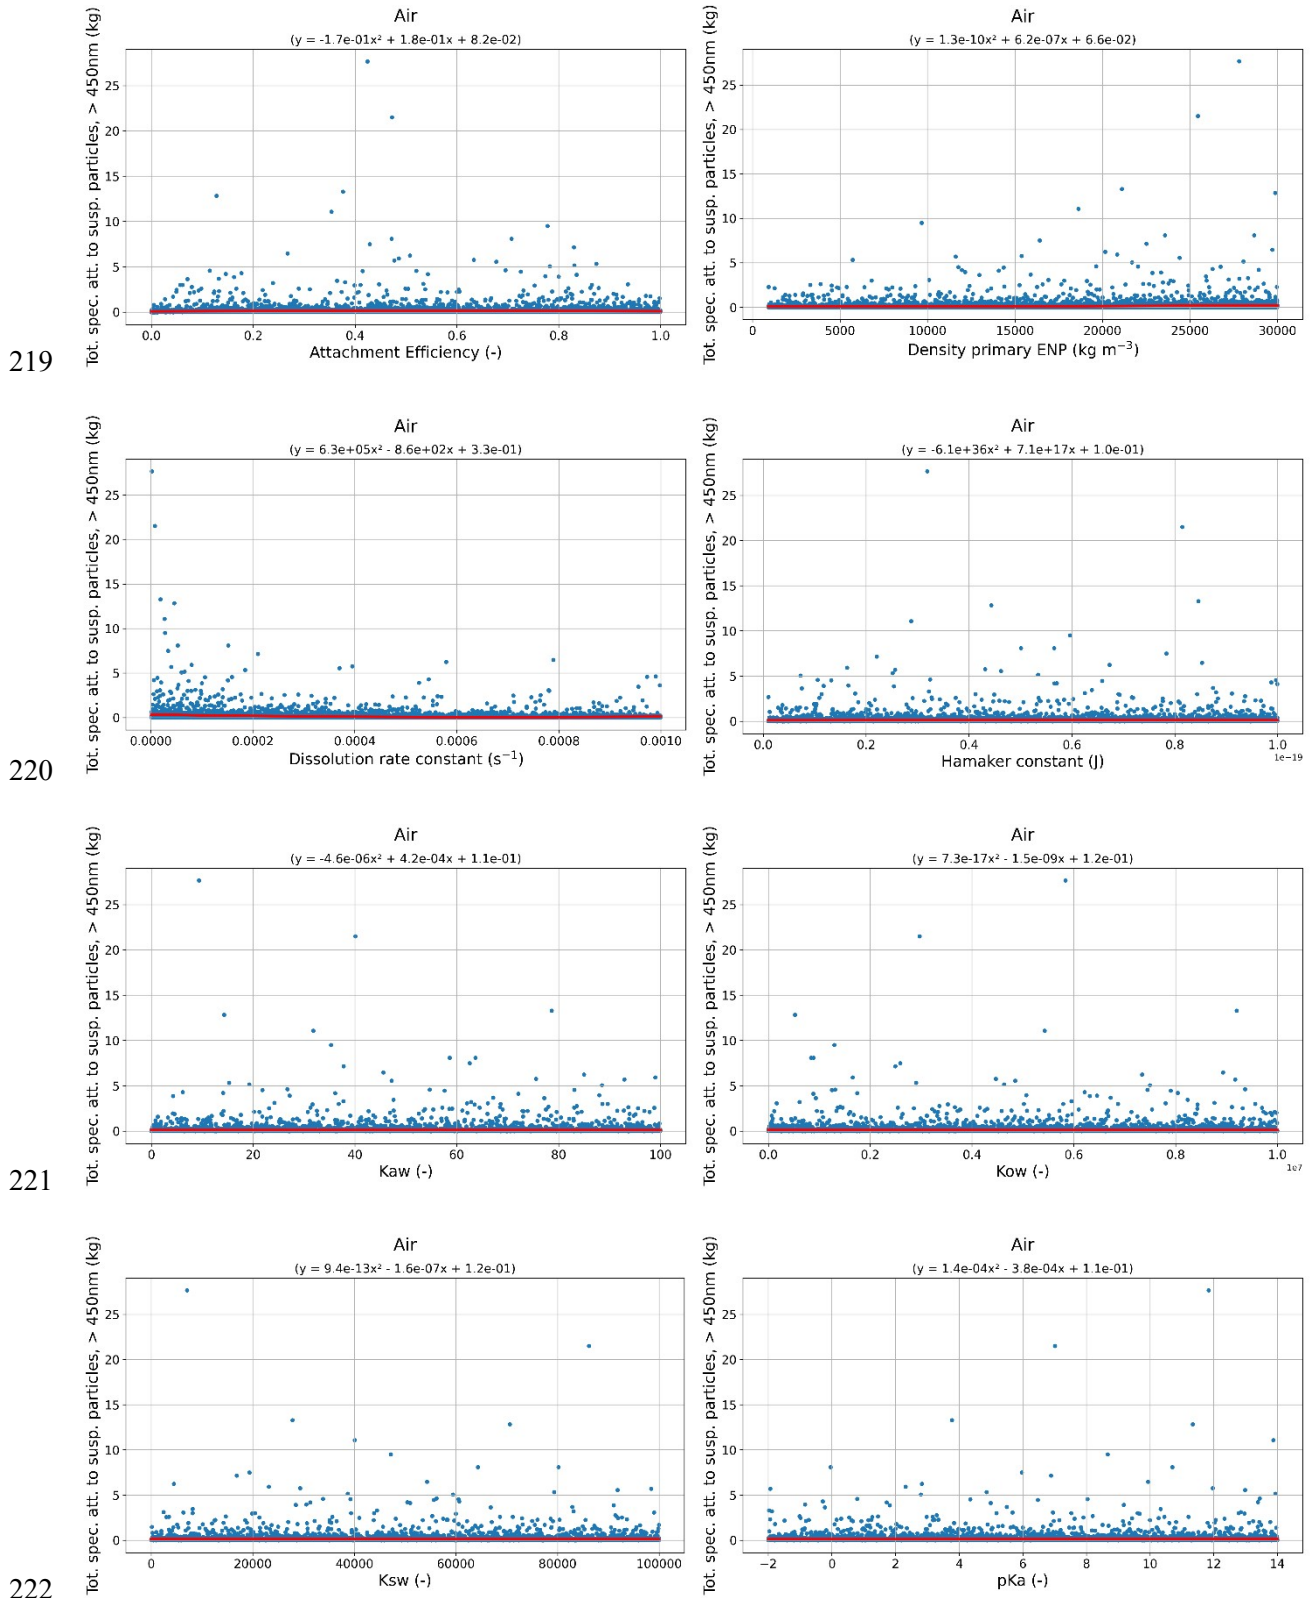

223

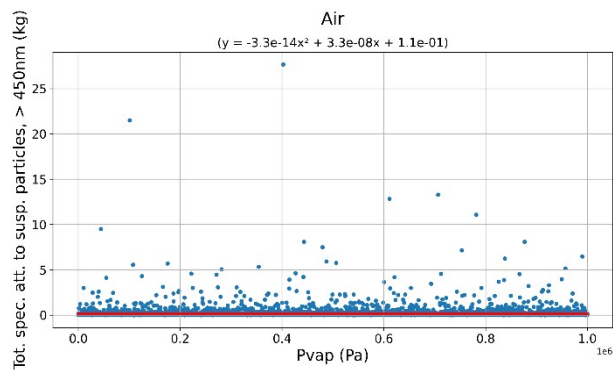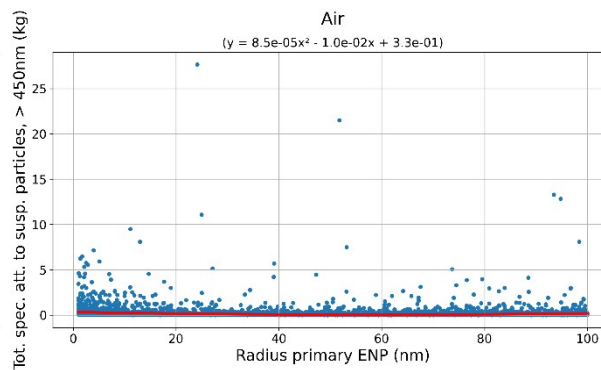

224

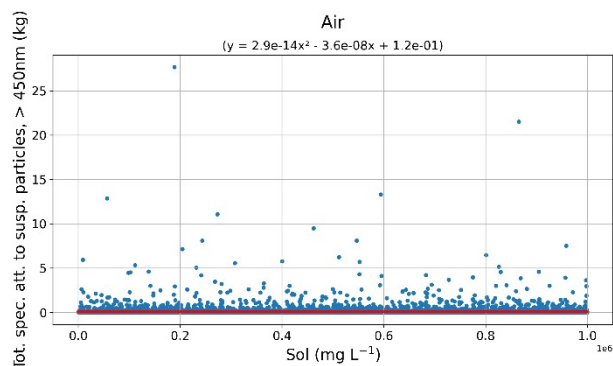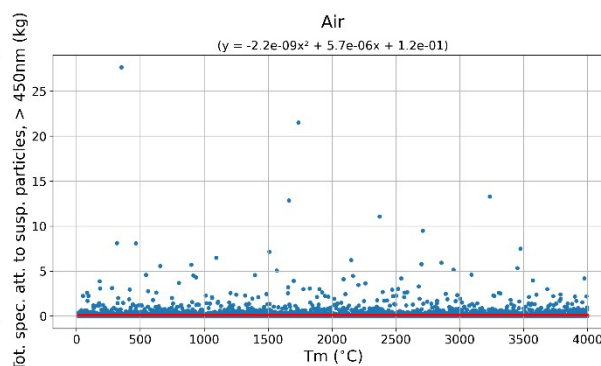

225

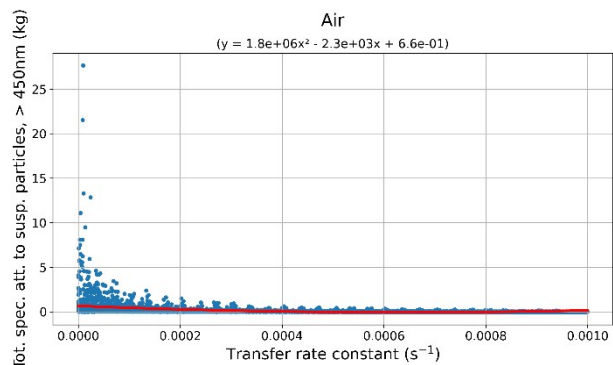

226

227

228

229

230

**Figure S21.** Scatter plots of the 10,000 simulation outputs generated with the *SimpleBox4nano* web application for the species attached to suspended particles (> 450 nm) (P) under the solid-species emission scenario ( $1000 \text{ t y}^{-1}$ ) to the air compartment at the moderate (global-scale) zone. Each panel corresponds to one of the 13 physicochemical parameters (x-axis), plotted against the resulting total dissolved/gas mass (kg) at steady state (y-axis). Fitted second-order polynomial curves are included in each panel to provide an initial visual indication of non-linear trends.

231

232 S10.1.2 Soil

233 S10.1.2.1 Dissolved/Gas species

234

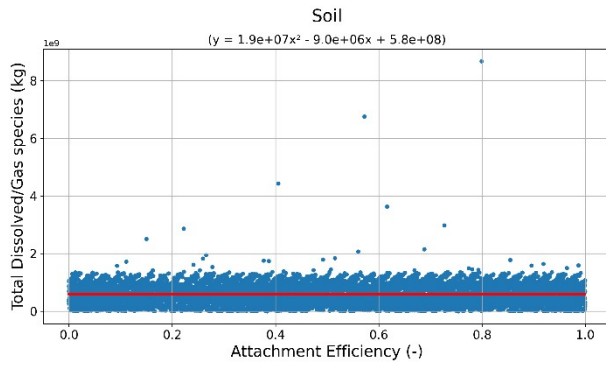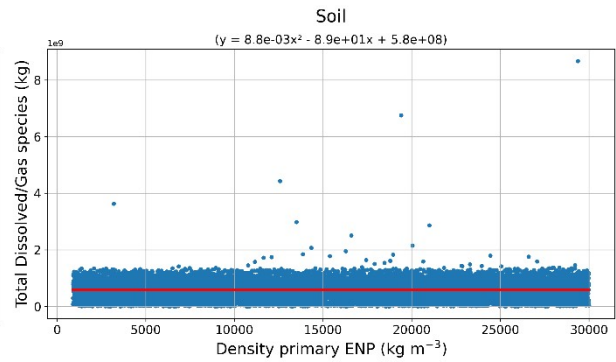

235

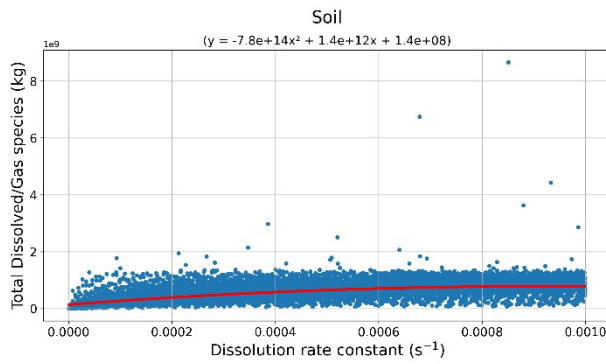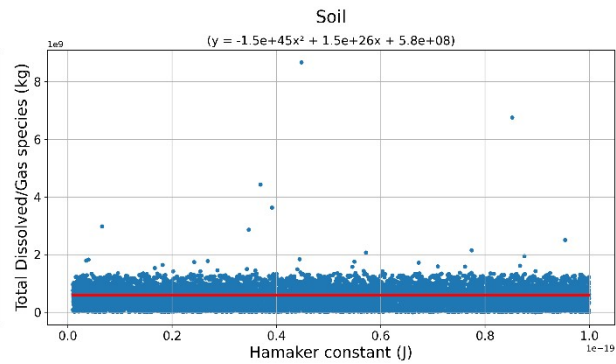

236

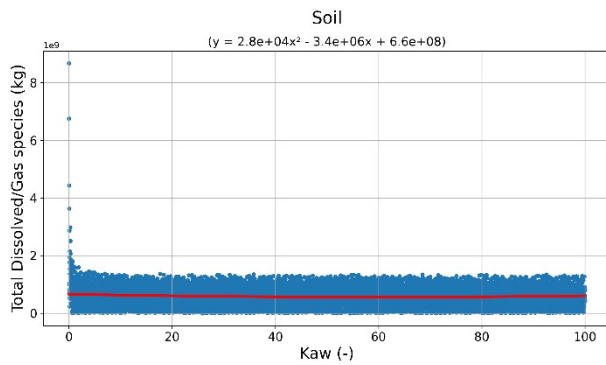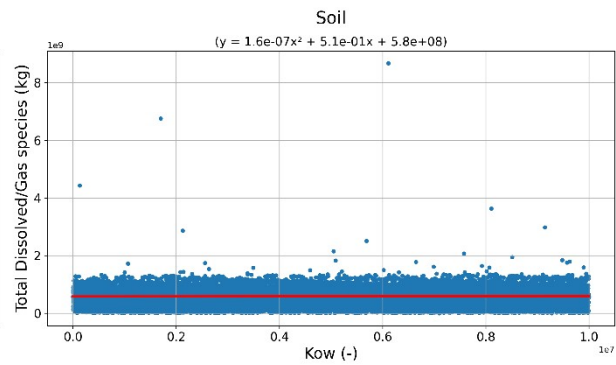

237

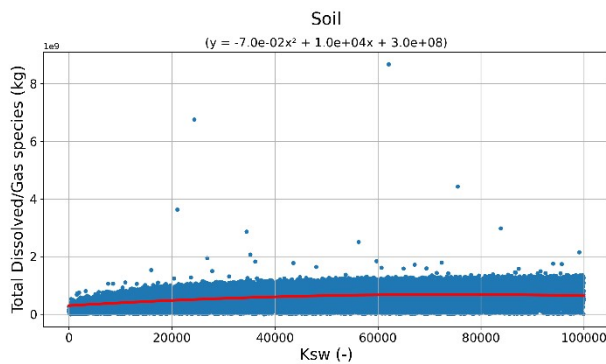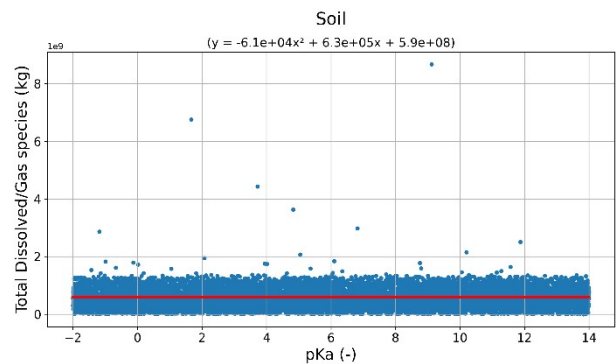

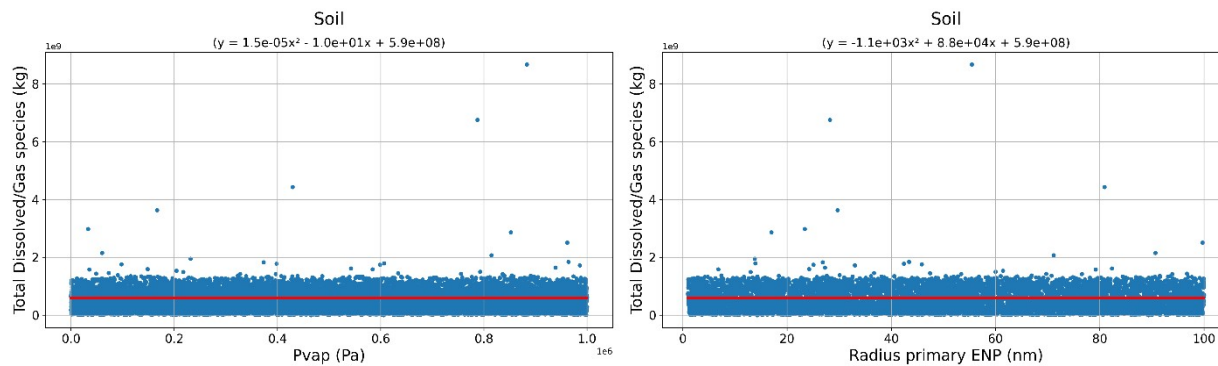

238

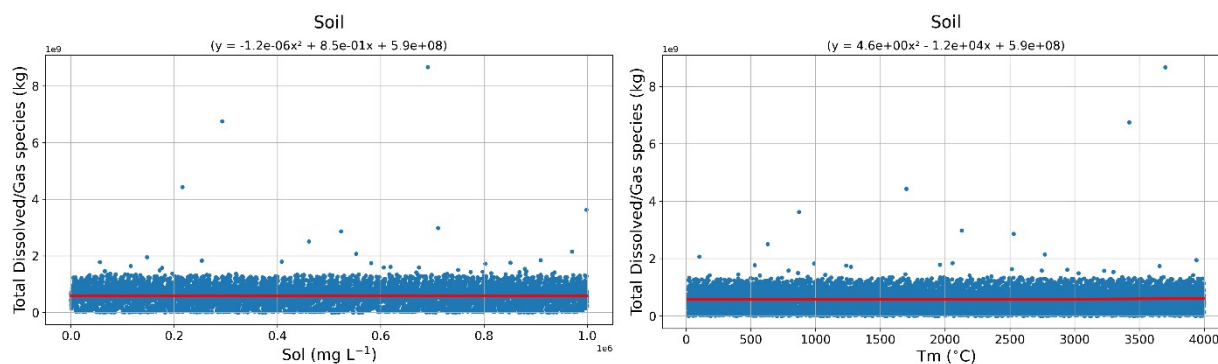

239

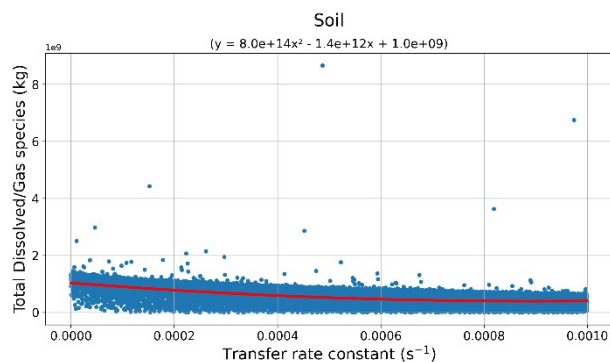

240

241 **Figure S22.** Scatter plots of the 10,000 simulation outputs generated with the *SimpleBox4nano* web application for the  
 242 dissolved/gas species (D-species) under the solid-species emission scenario ( $1000 \text{ t y}^{-1}$ ) to the soil compartment at the moderate  
 243 (global-scale) zone. Each panel corresponds to one of the 13 physicochemical parameters (x-axis), plotted against the resulting  
 244 total dissolved/gas mass (kg) at steady state (y-axis). Fitted second-order polynomial curves are included in each panel to provide  
 245 an initial visual indication of non-linear trends.

246

247 **S10.1.2.2 Total Solid species**

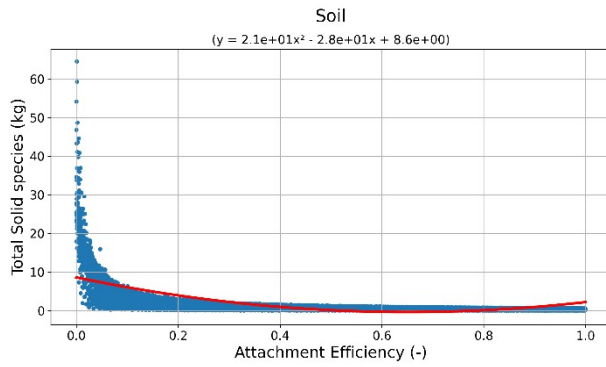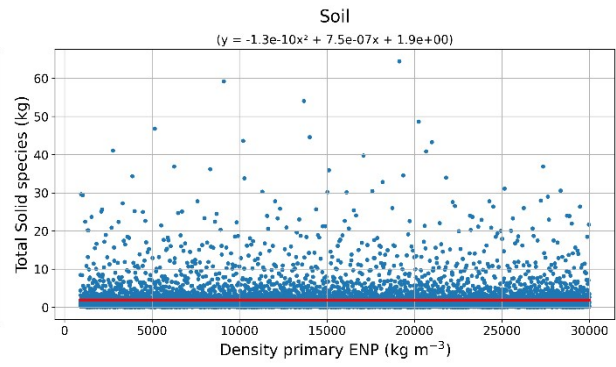

248

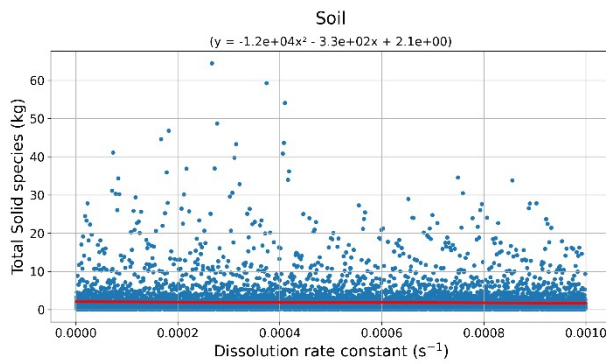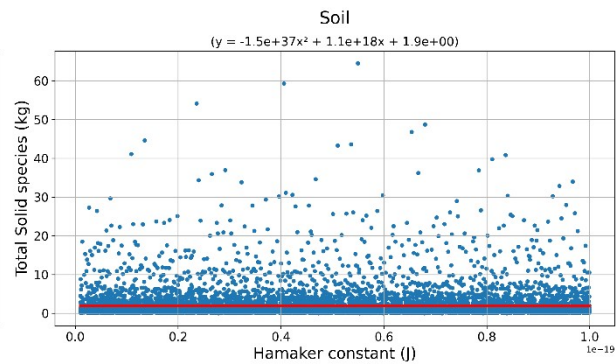

249

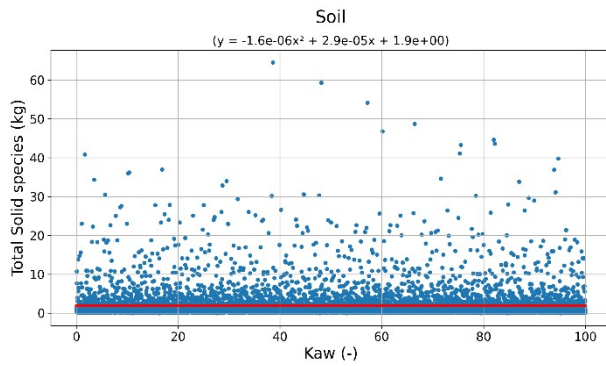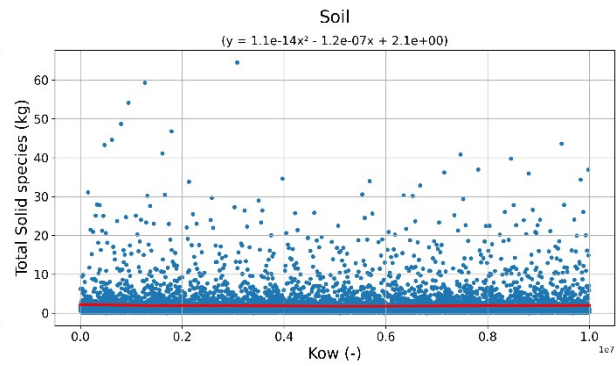

250

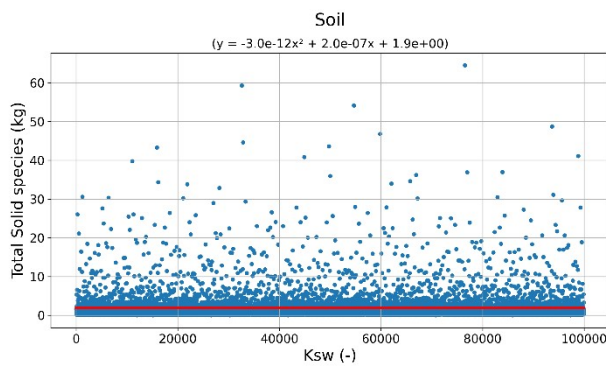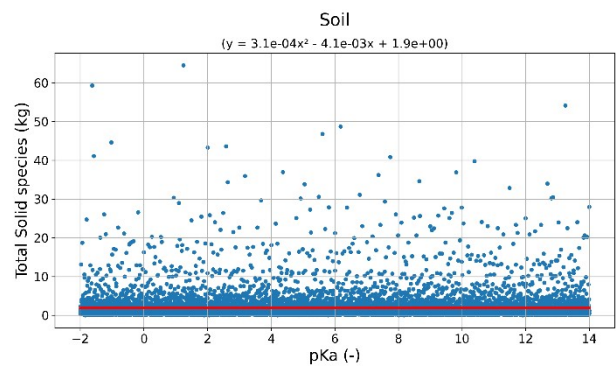

251

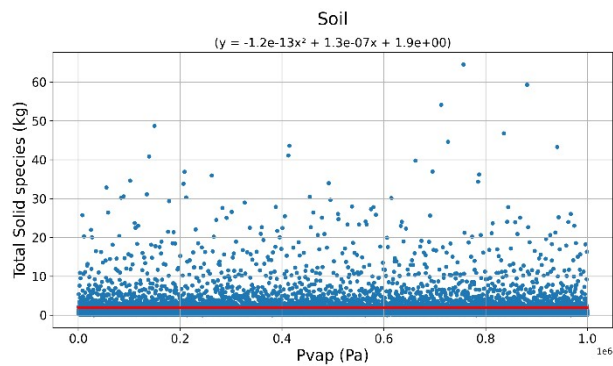

252

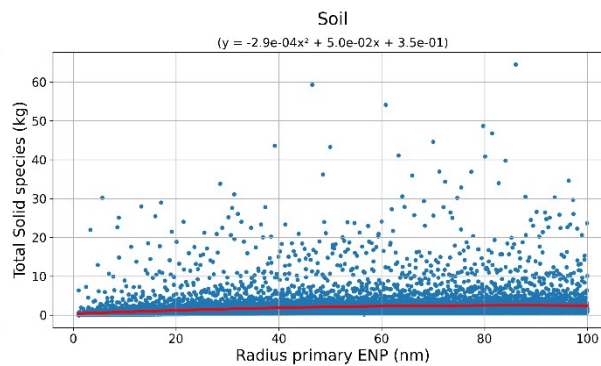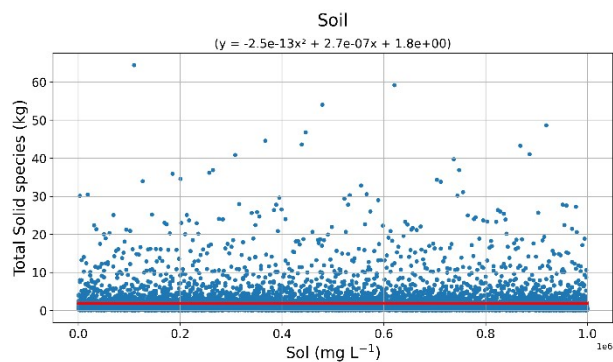

253

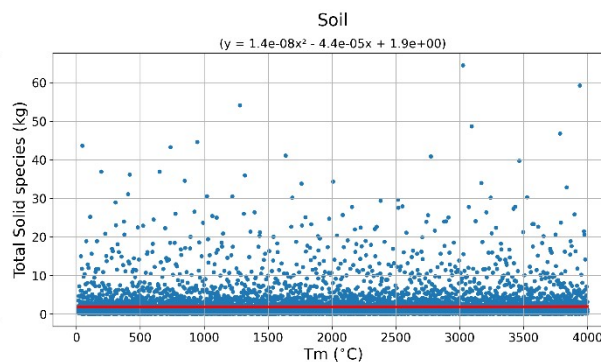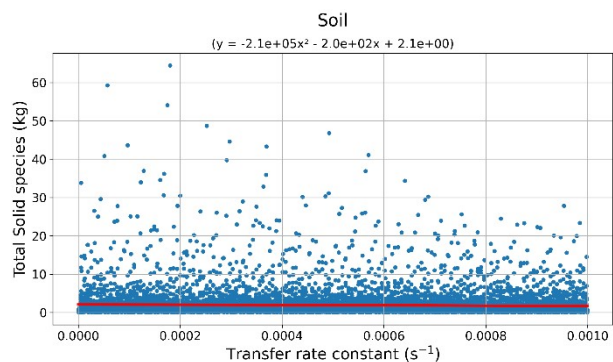

254

255 **Figure S23.** Scatter plots of the 10,000 simulation outputs generated with the *SimpleBox4nano* web application for the solid  
 256 species (S-species) under the solid-species emission scenario ( $1000 \text{ t y}^{-1}$ ) to the soil compartment at the moderate (global-scale)  
 257 zone. Each panel corresponds to one of the 13 physicochemical parameters (x-axis), plotted against the resulting total  
 258 dissolved/gas mass (kg) at steady state (y-axis). Fitted second-order polynomial curves are included in each panel to provide an  
 259 initial visual indication of non-linear trends.

260

261 **S10.1.2.3 Total species attached to NCs (< 450 nm)**

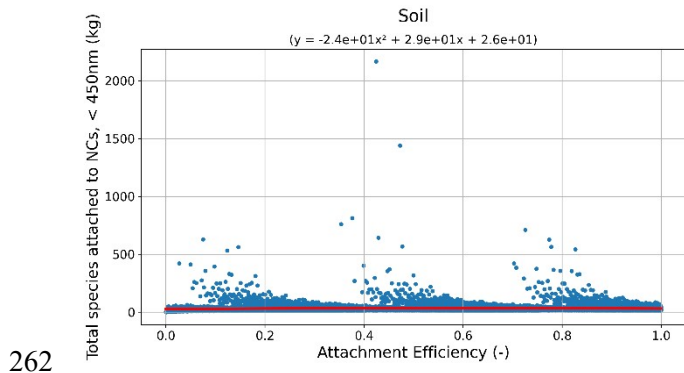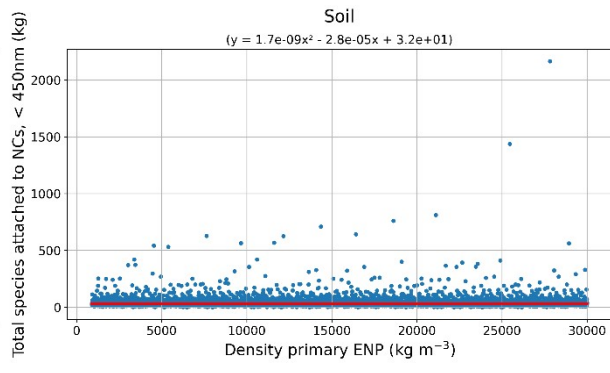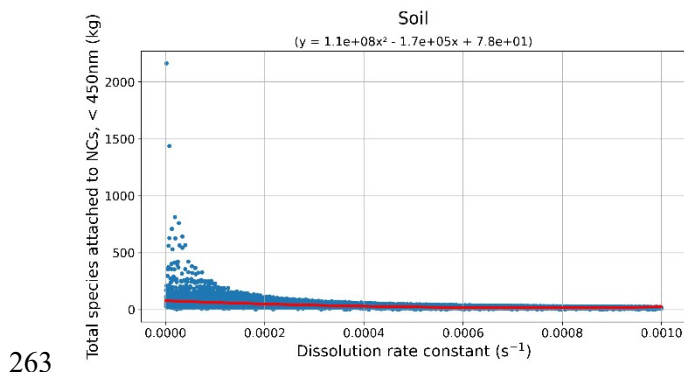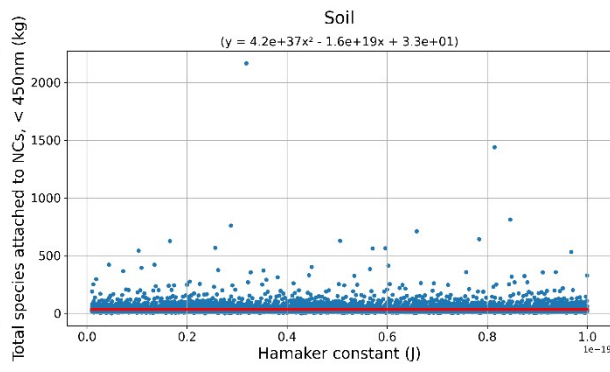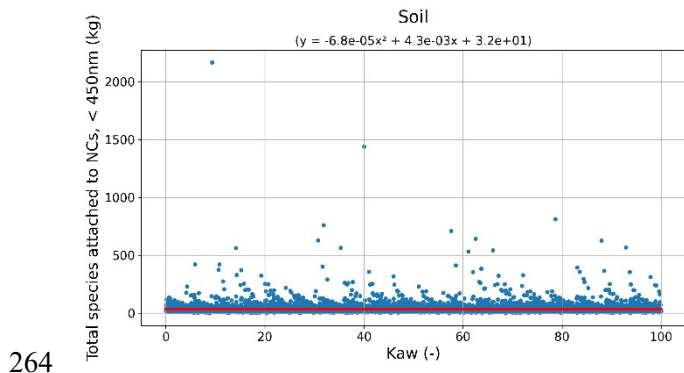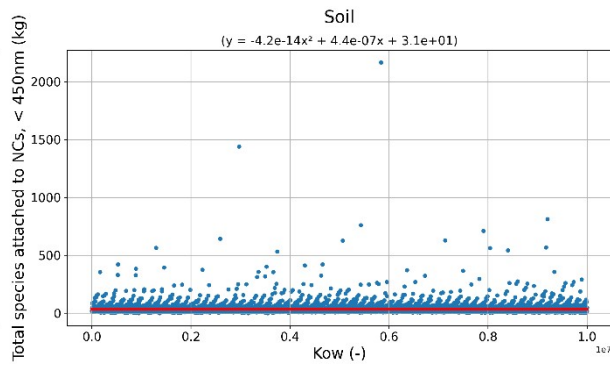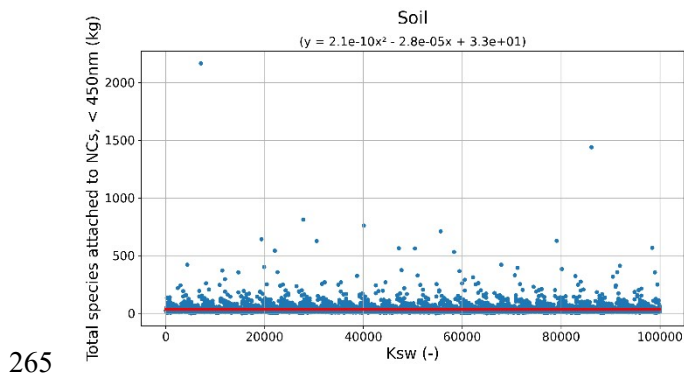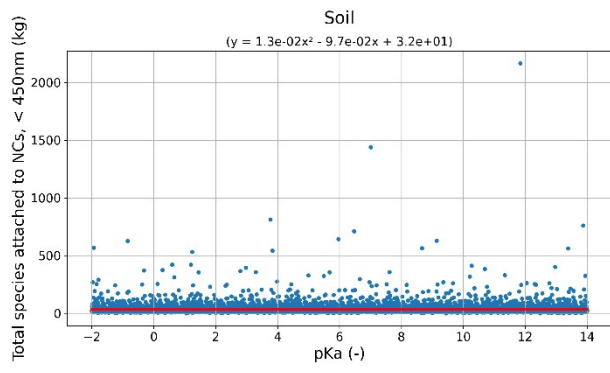

266

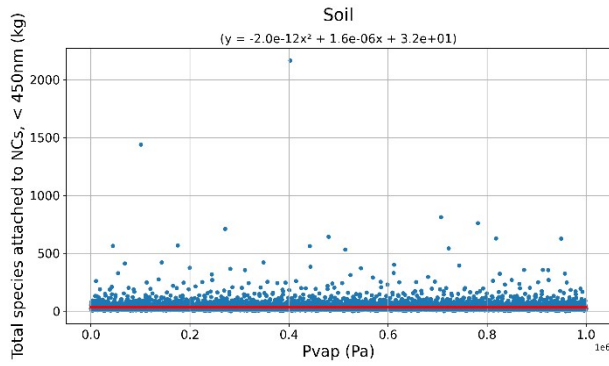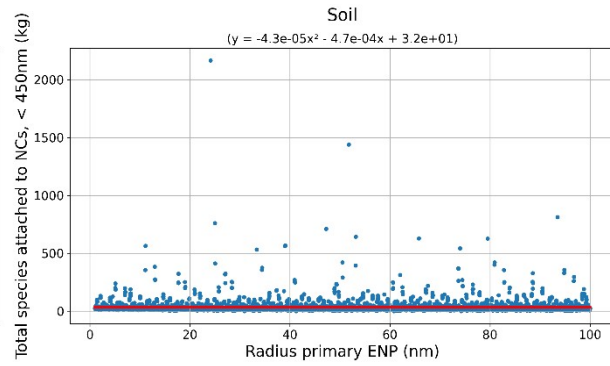

267

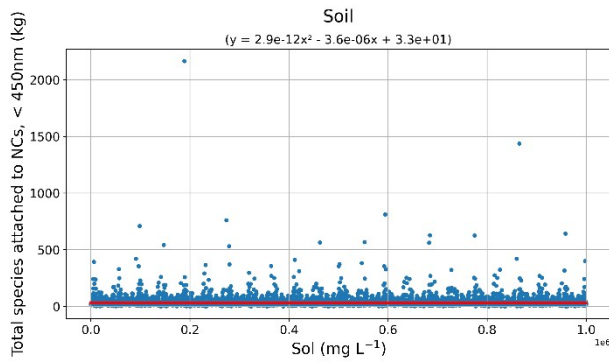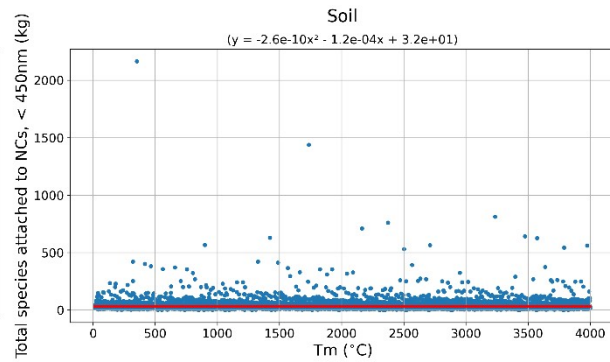

268

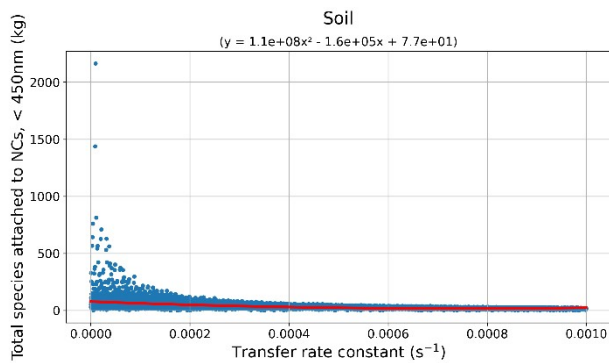

269

270

271

272

273

**Figure S24.** Scatter plots of the 10,000 simulation outputs generated with the *SimpleBox4nano* web application for the hetero-aggregated species attached to natural colloids (< 450 nm) (A) under the solid-species emission scenario (1000 t y<sup>-1</sup>) to the soil compartment at the moderate (global-scale) zone. Each panel corresponds to one of the 13 physicochemical parameters (x-axis), plotted against the resulting total dissolved/gas mass (kg) at steady state (y-axis). Fitted second-order polynomial curves are included in each panel to provide an initial visual indication of non-linear trends.

274

275 **S10.1.2.4 Total species attached to suspended particles (> 450 nm)**

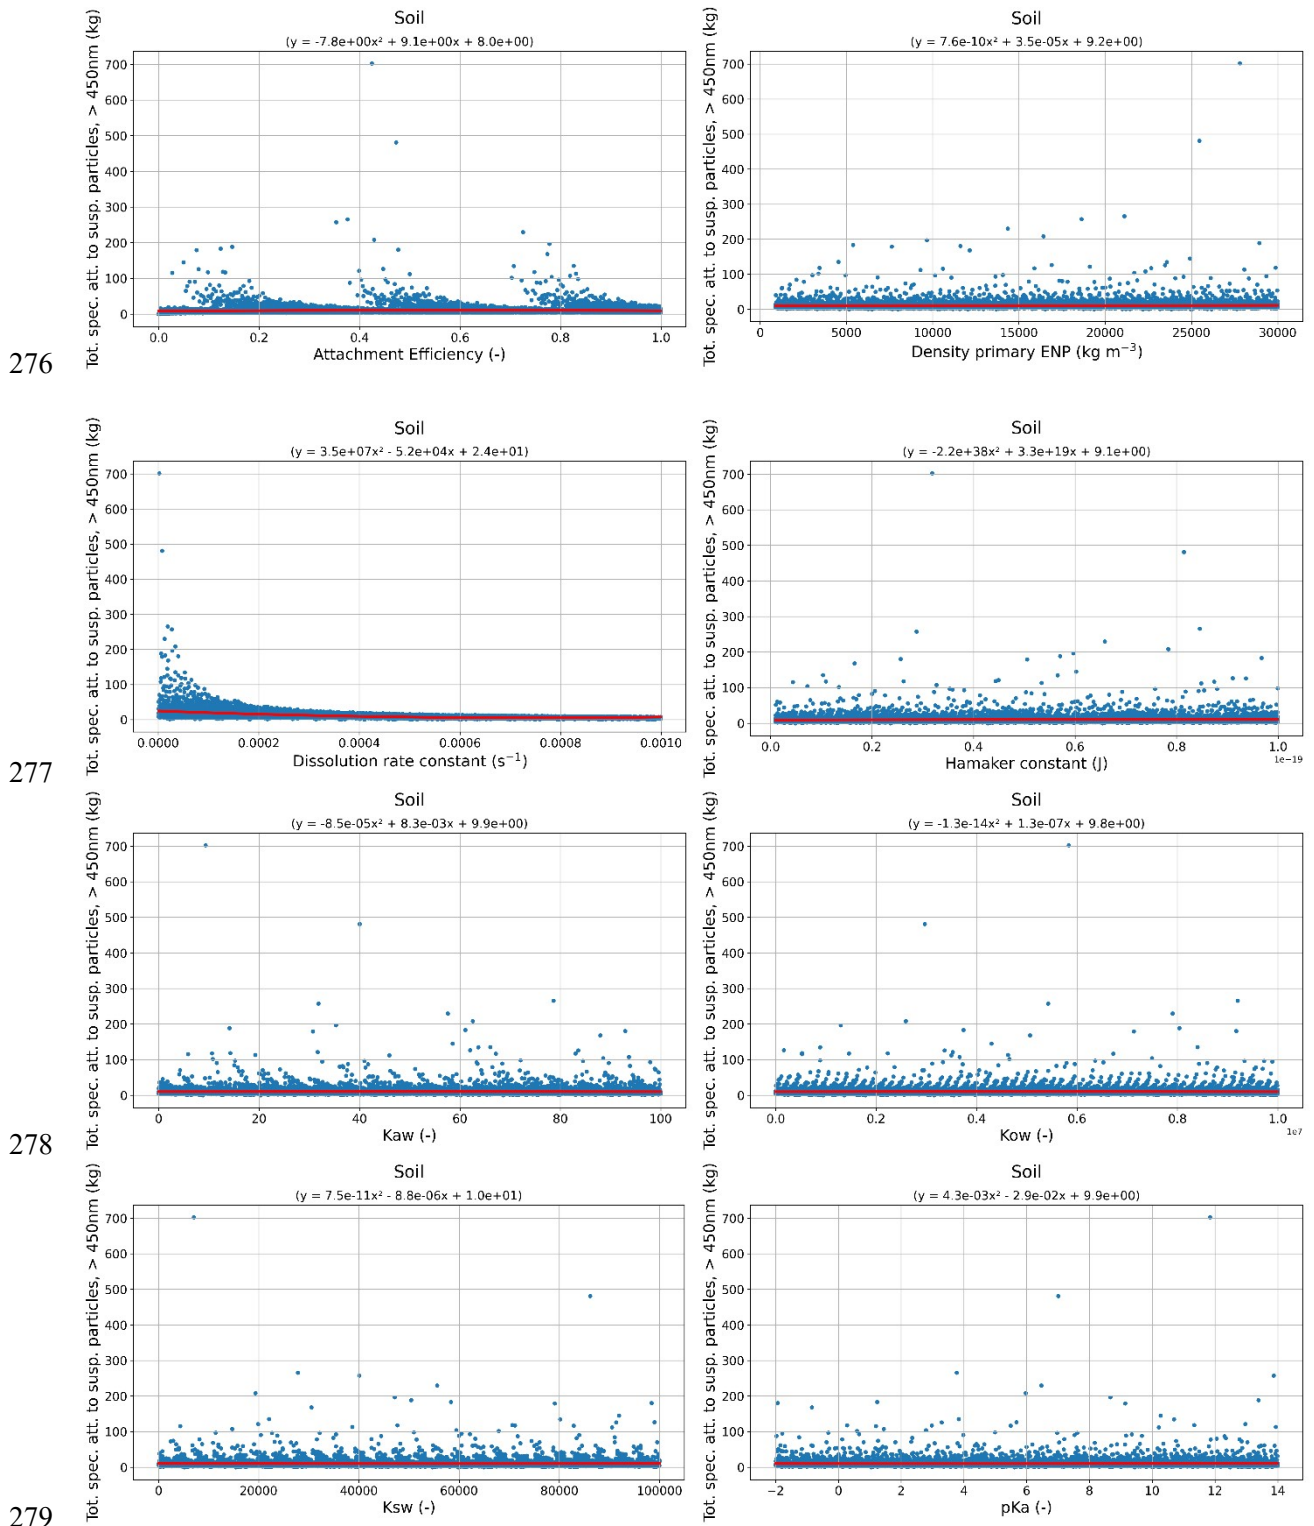

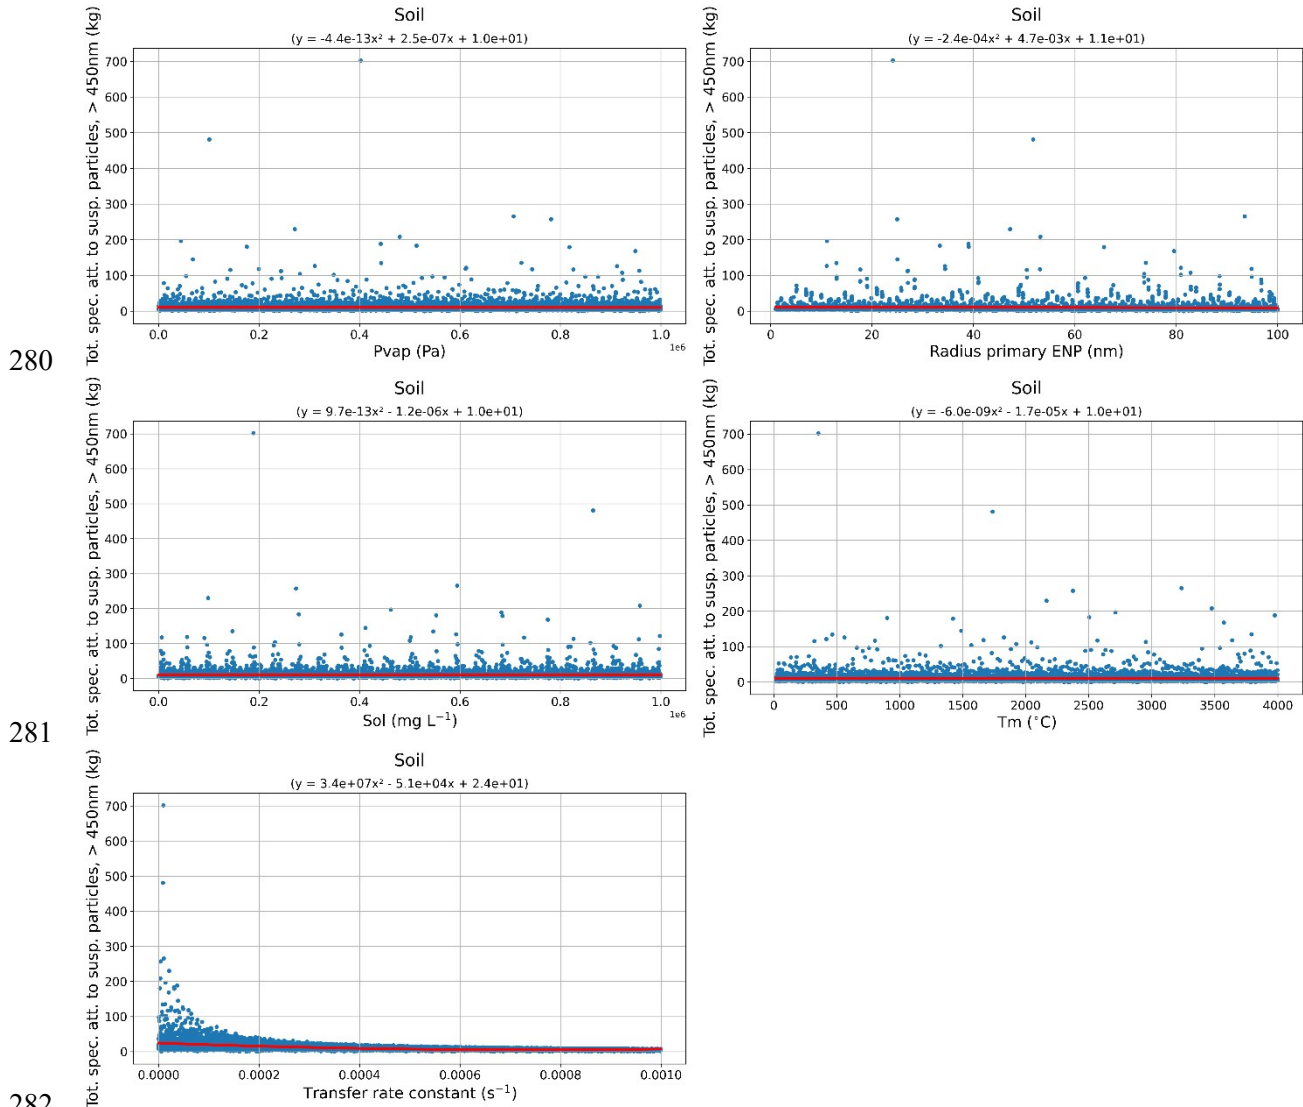

283 **Figure S25.** Scatter plots of the 10,000 simulation outputs generated with the *SimpleBox4nano* web application for the species  
 284 attached to suspended particles (> 450 nm) (P) under the solid-species emission scenario ( $1000 \text{ t y}^{-1}$ ) to the soil compartment at  
 285 the moderate (global-scale) zone. Each panel corresponds to one of the 13 physicochemical parameters (x-axis), plotted against  
 286 the resulting total dissolved/gas mass (kg) at steady state (y-axis). Fitted second-order polynomial curves are included in each  
 287 panel to provide an initial visual indication of non-linear trends.

288

289 S10.1.3 Water

290 S10.1.3.1 Dissolved/Gas species

291

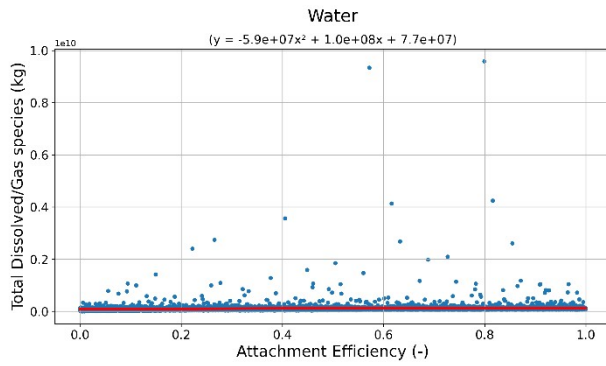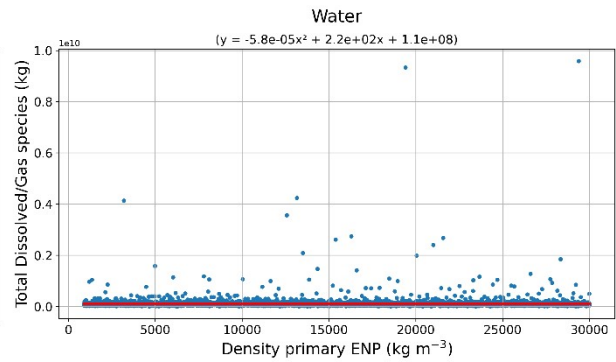

292

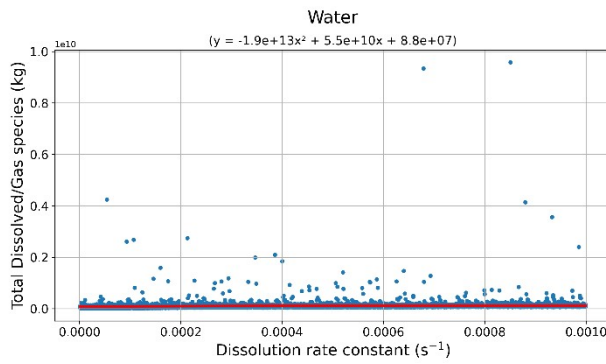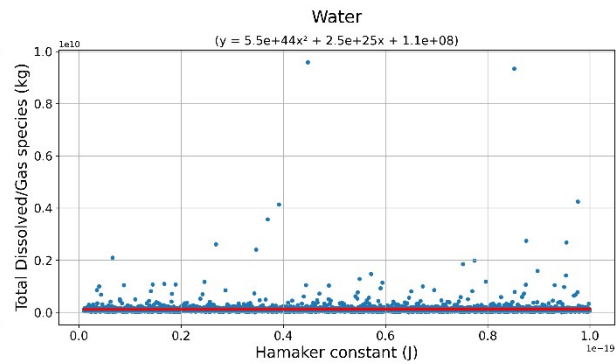

293

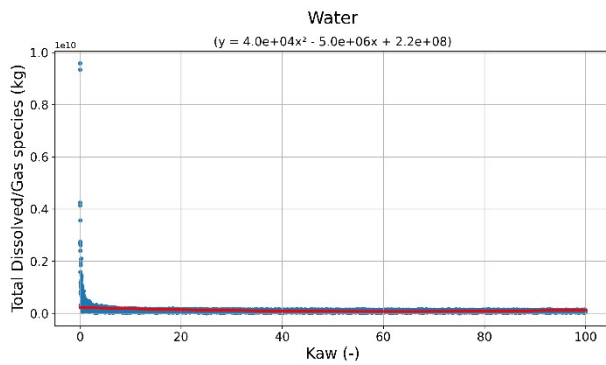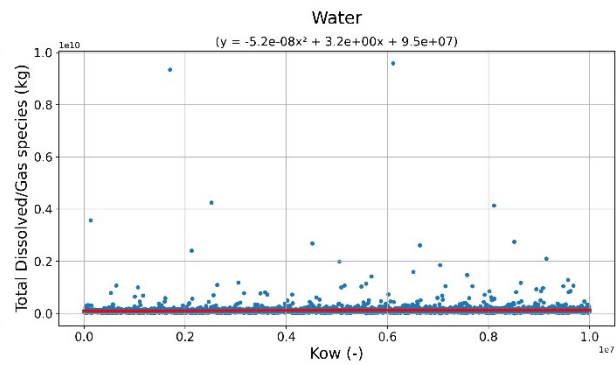

294

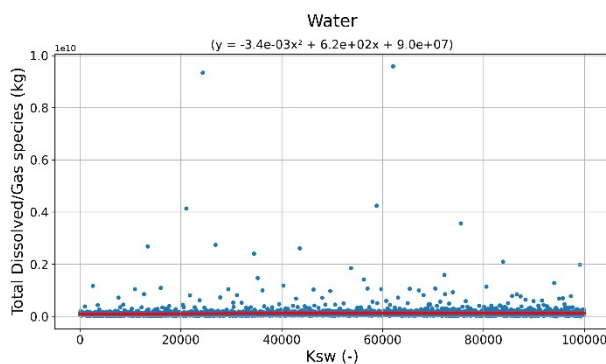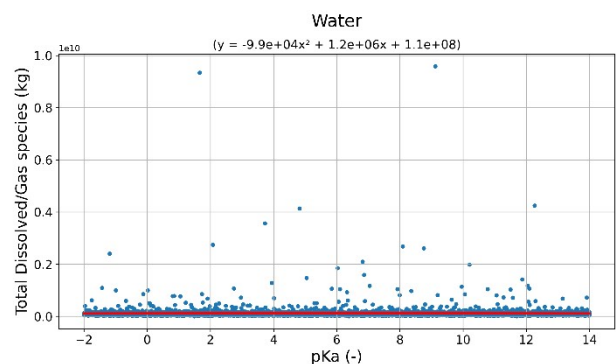

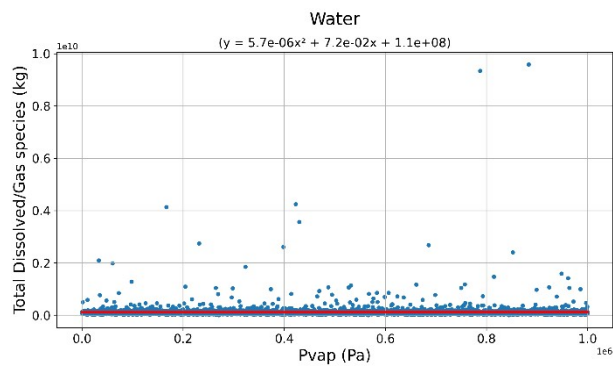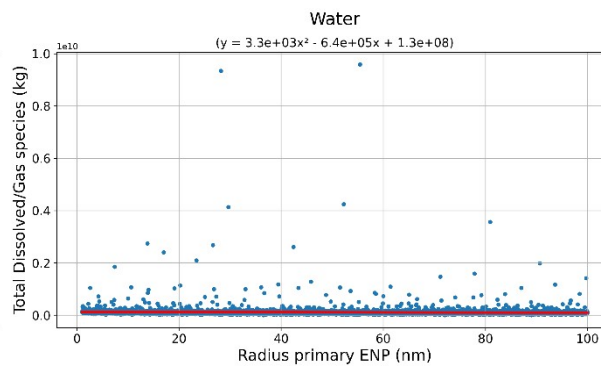

295

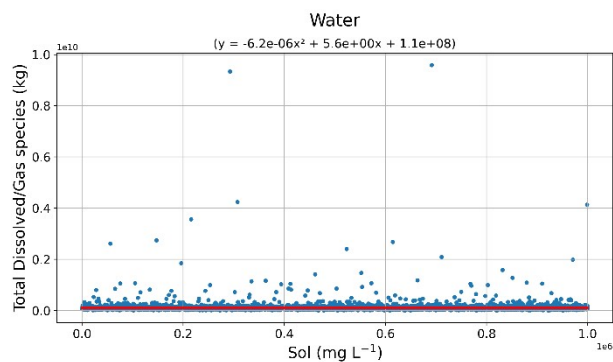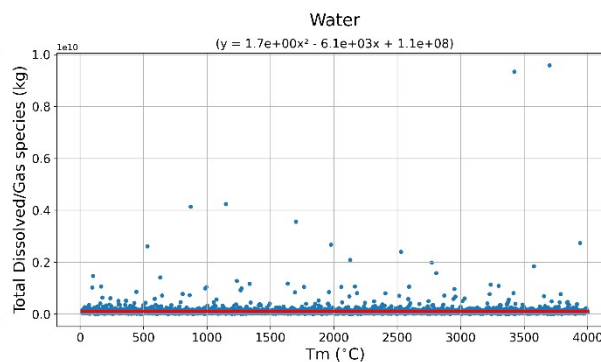

296

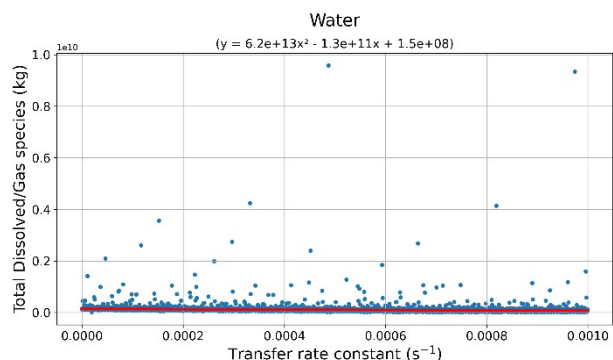

297

298 **Figure S26.** Scatter plots of the 10,000 simulation outputs generated with the *SimpleBox4nano* web application for the  
 299 dissolved/gas species (D-species) under the solid-species emission scenario ( $1000 \text{ t y}^{-1}$ ) to the water compartment at the moderate  
 300 (global-scale) zone. Each panel corresponds to one of the 13 physicochemical parameters (x-axis), plotted against the resulting  
 301 total dissolved/gas mass (kg) at steady state (y-axis). Fitted second-order polynomial curves are included in each panel to provide  
 302 an initial visual indication of non-linear trends.

303

304 **S10.1.3.2 Total Solid species**

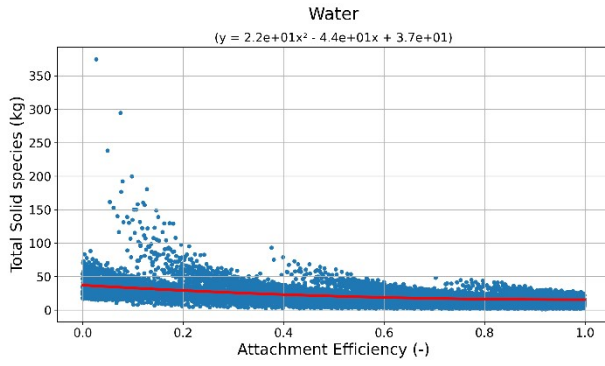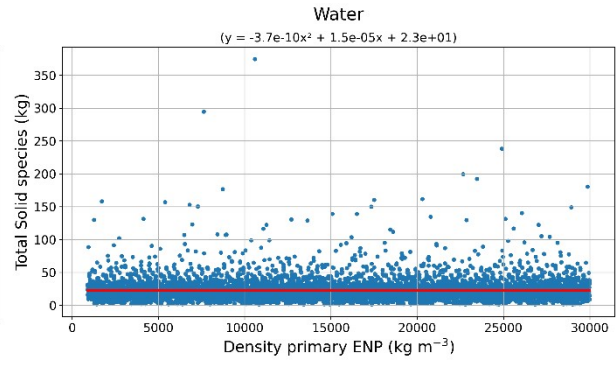

305

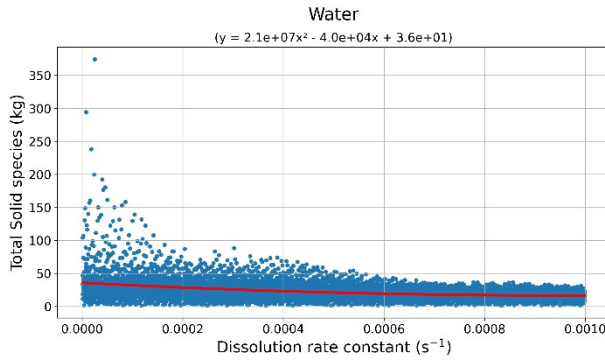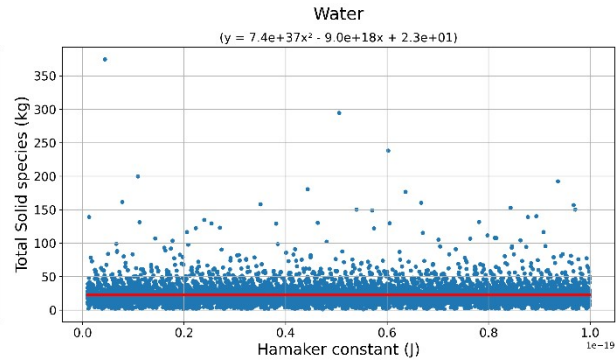

306

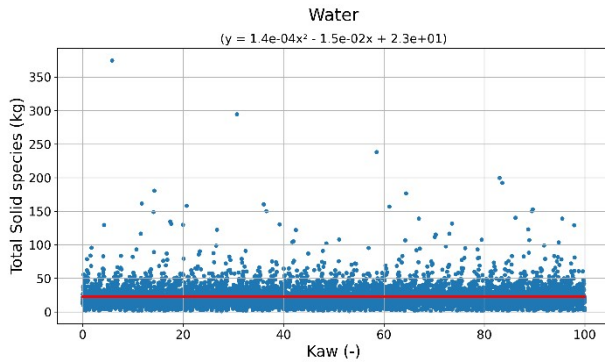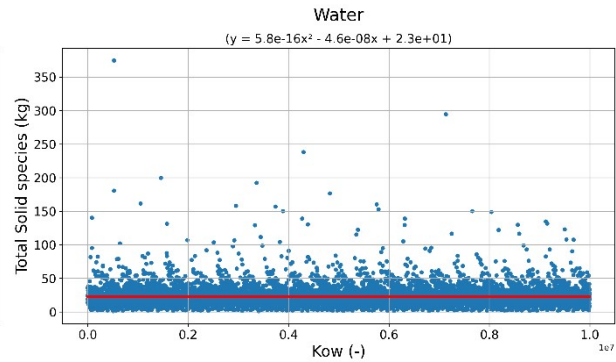

307

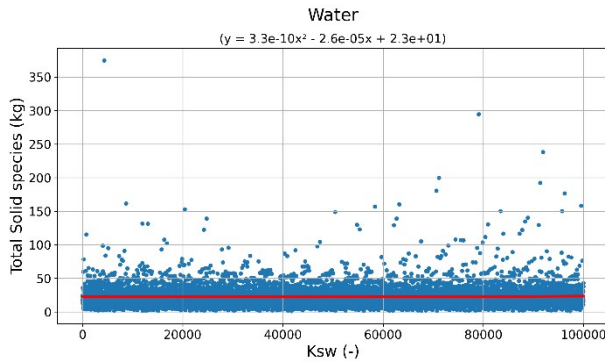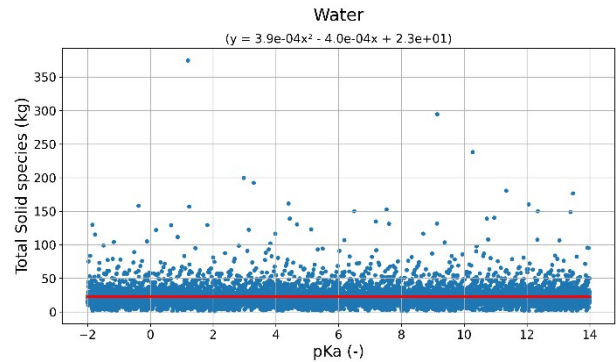

308

309

310

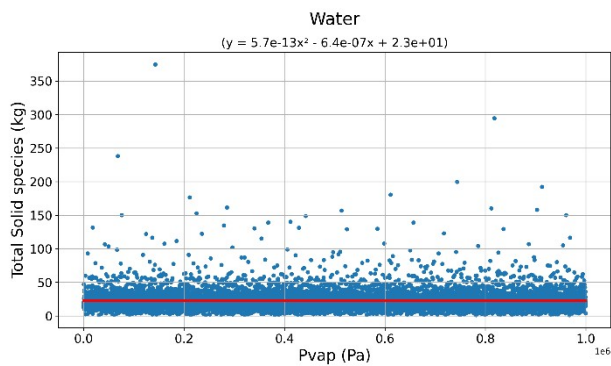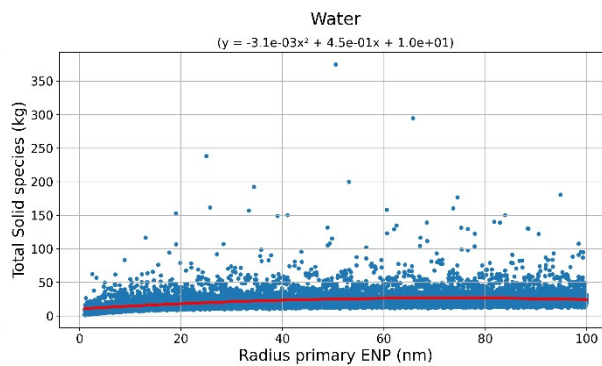

311

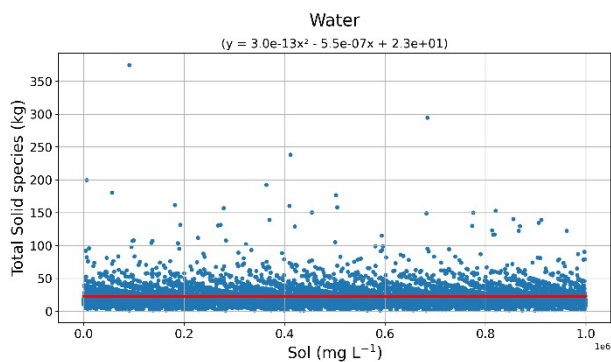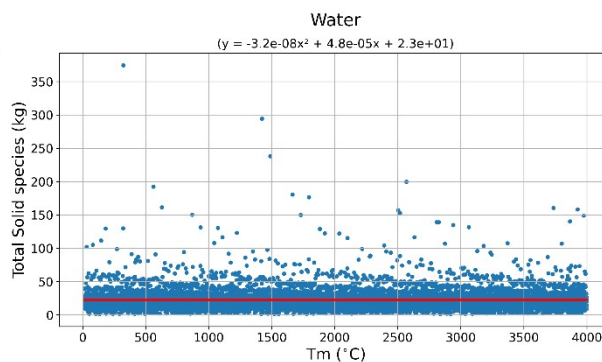

312

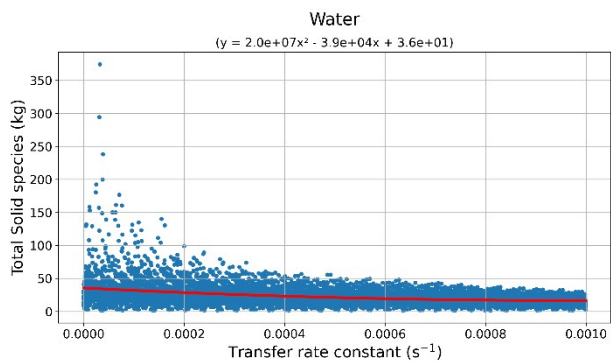

313

314 **Figure S27.** Scatter plots of the 10,000 simulation outputs generated with the *SimpleBox4nano* web application for the solid  
 315 species (S-species) under the solid-species emission scenario (1000 t y<sup>-1</sup>) to the water compartment at the moderate (global-scale)  
 316 zone. Each panel corresponds to one of the 13 physicochemical parameters (x-axis), plotted against the resulting total  
 317 dissolved/gas mass (kg) at steady state (y-axis). Fitted second-order polynomial curves are included in each panel to provide an  
 318 initial visual indication of non-linear trends.

319

320 **S10.1.3.3 Total species attached to NCs (< 450 nm)**

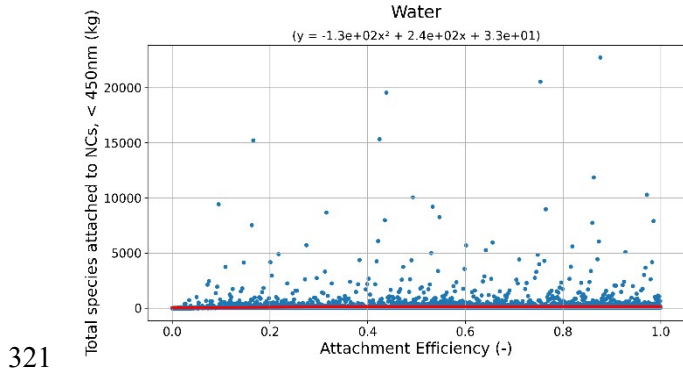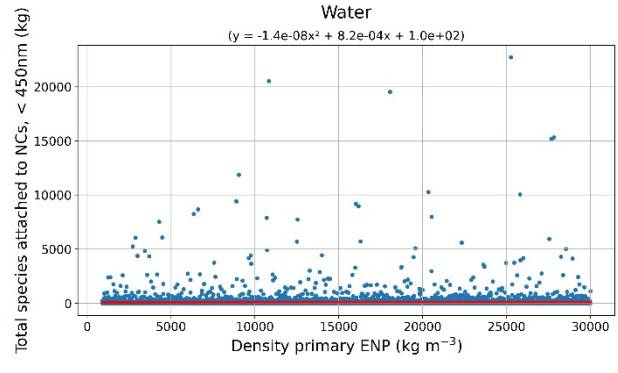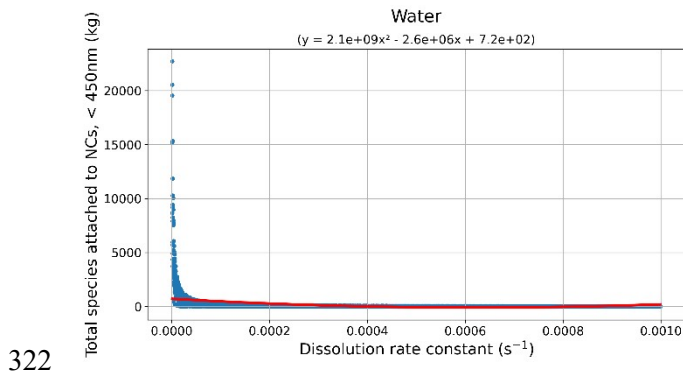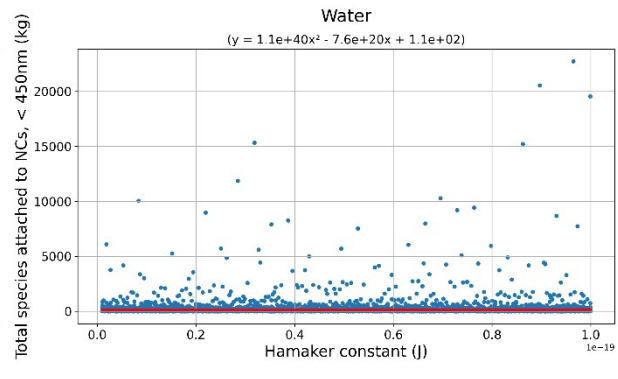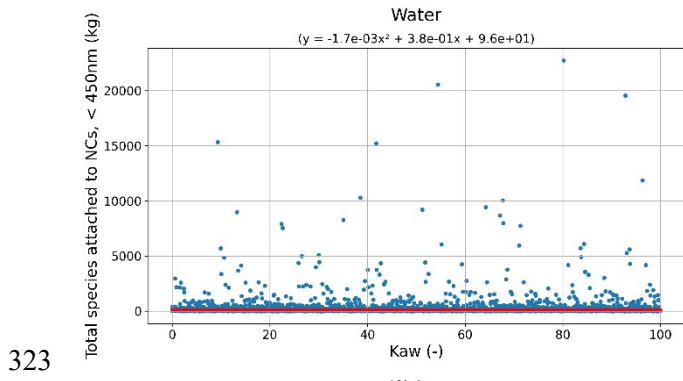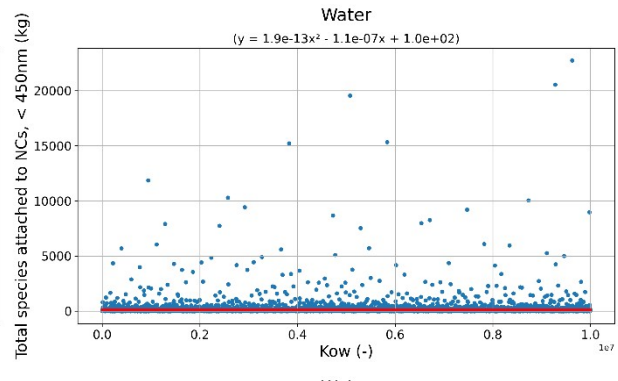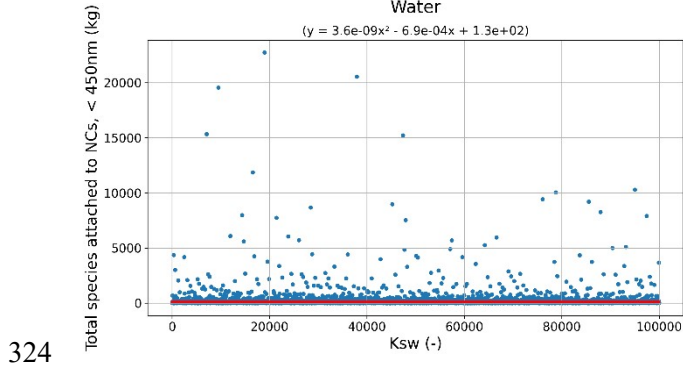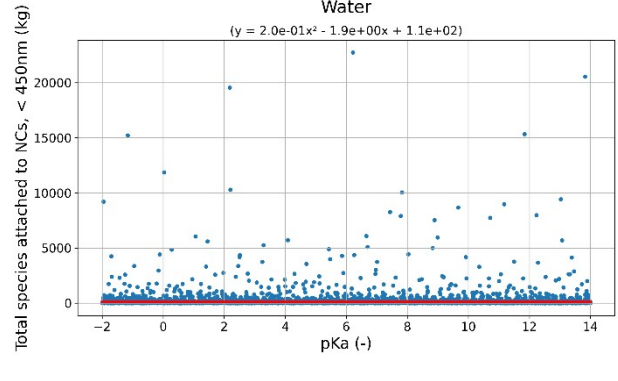

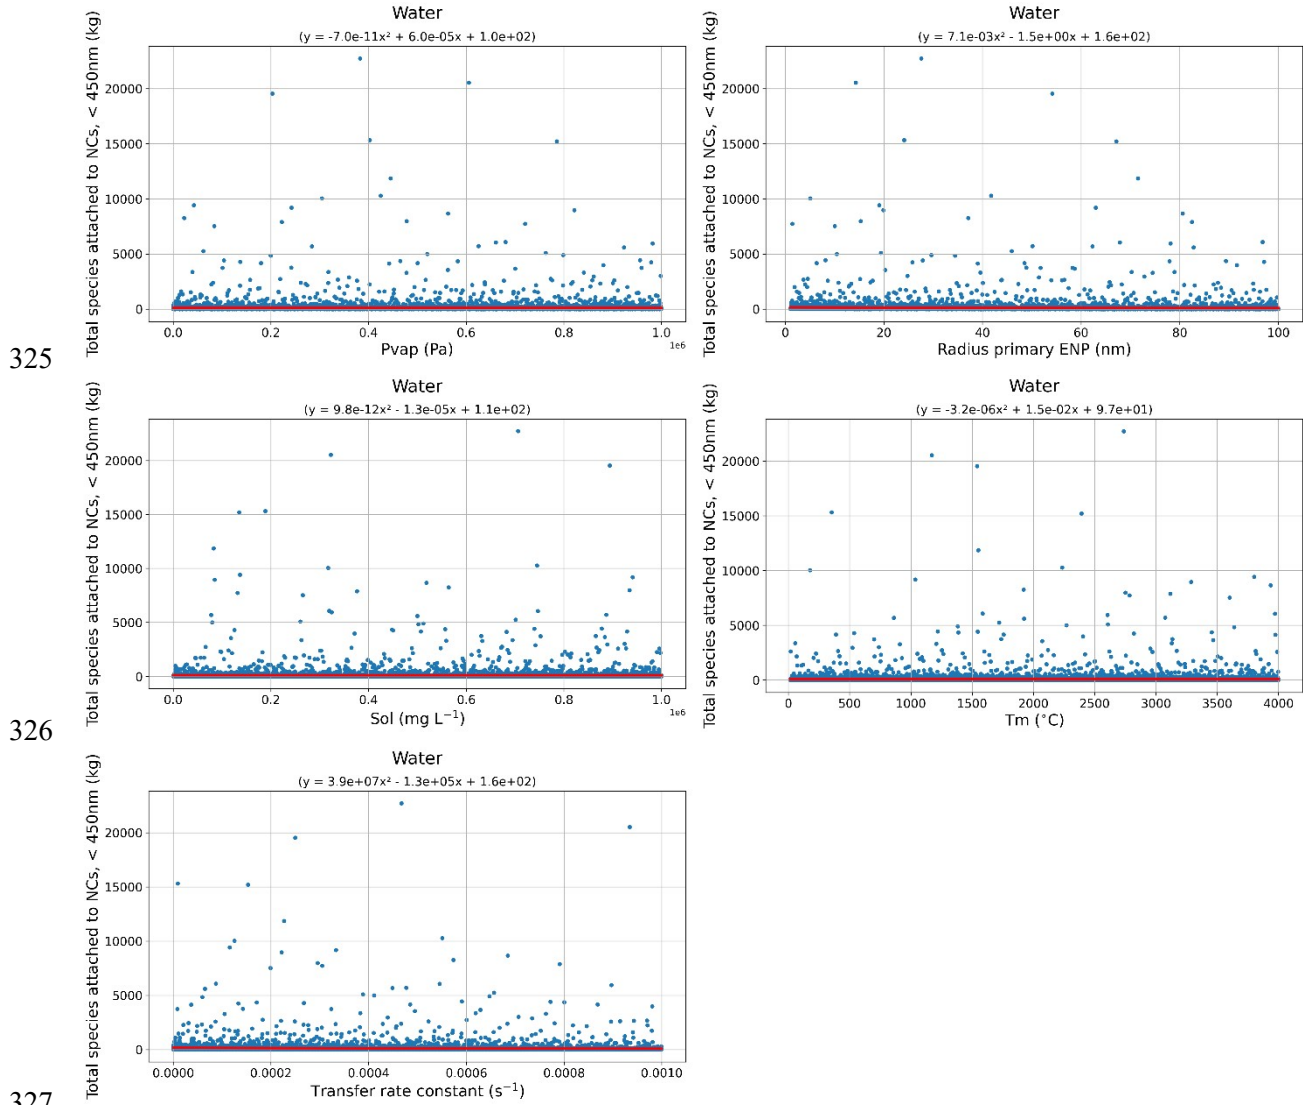

328 **Figure S28.** Scatter plots of the 10,000 simulation outputs generated with the *SimpleBox4nano* web application for the hetero-  
 329 aggregated species attached to natural colloids (< 450 nm) (A) under the solid-species emission scenario ( $1000 \text{ t y}^{-1}$ ) to the water  
 330 compartment at the moderate (global-scale) zone. Each panel corresponds to one of the 13 physicochemical parameters (x-axis),  
 331 plotted against the resulting total dissolved/gas mass (kg) at steady state (y-axis). Fitted second-order polynomial curves are  
 332 included in each panel to provide an initial visual indication of non-linear trends.

333

334 **S10.1.3.4 Total species attached to suspended particles (> 450 nm)**

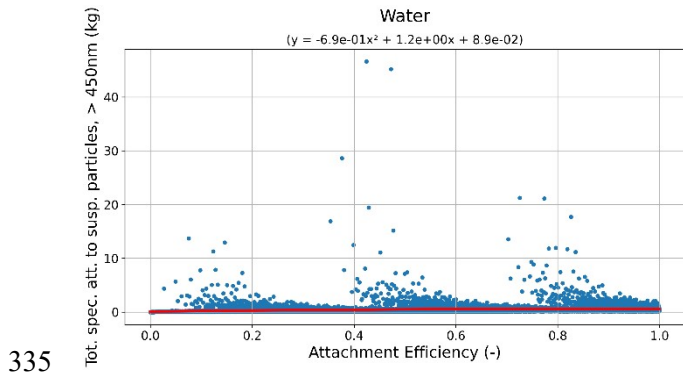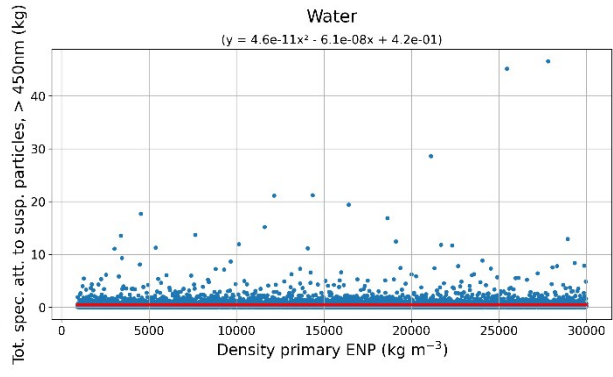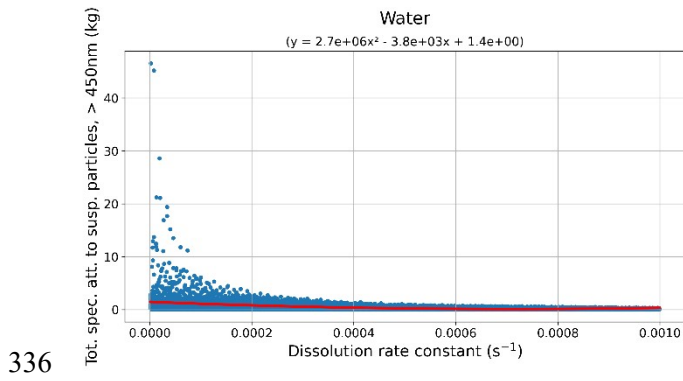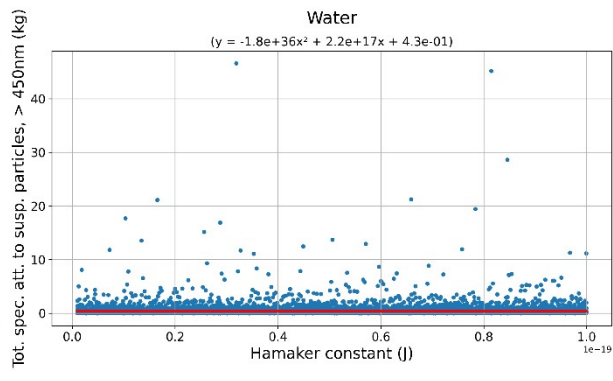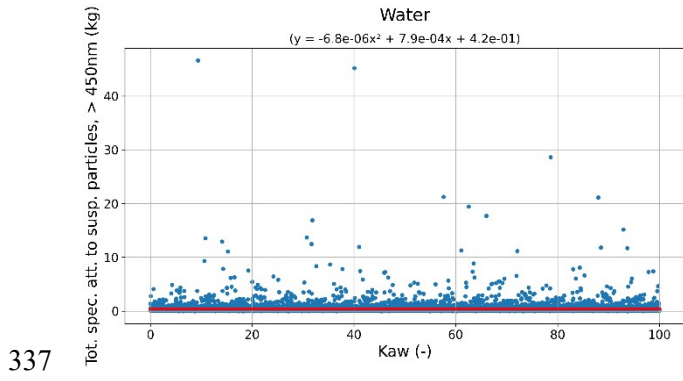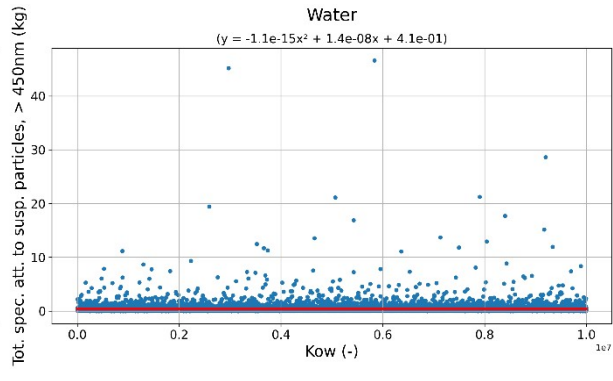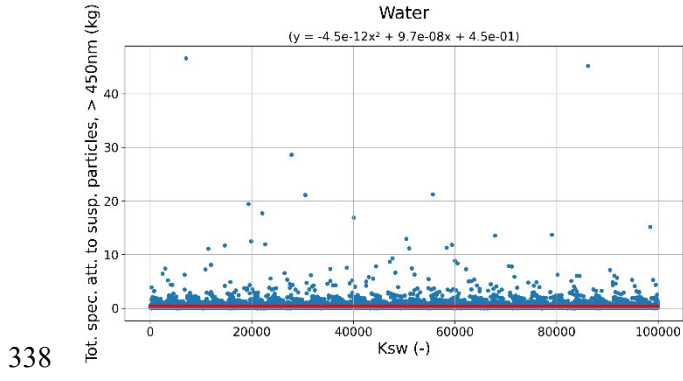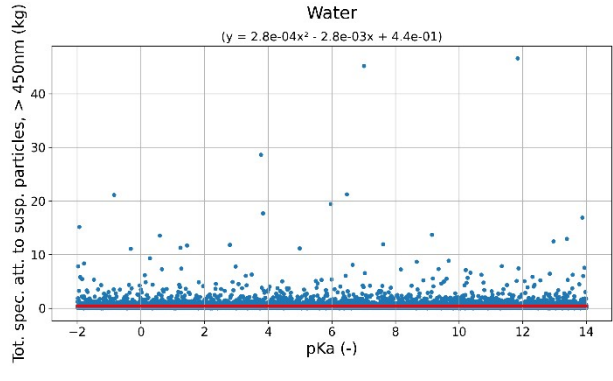

339

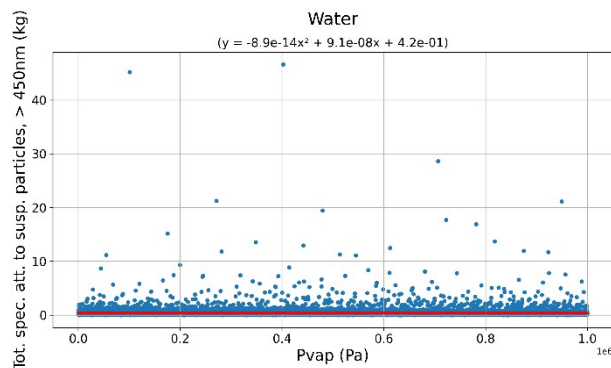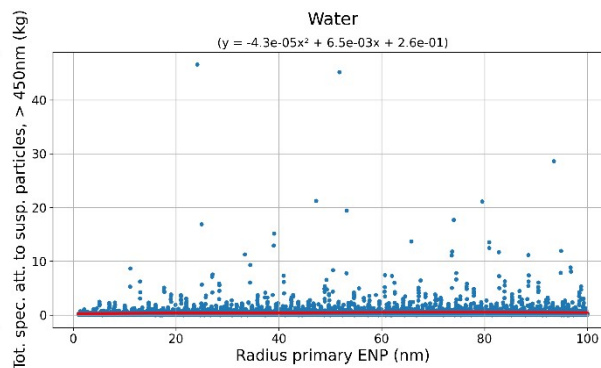

340

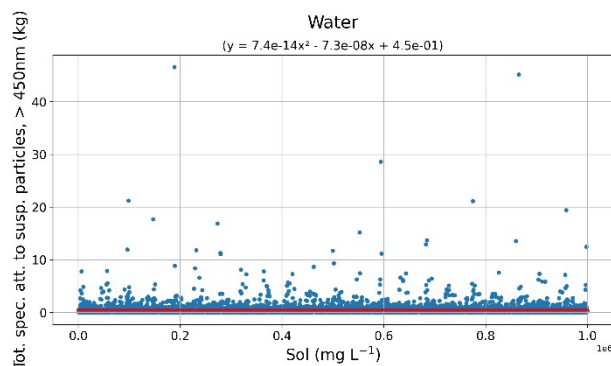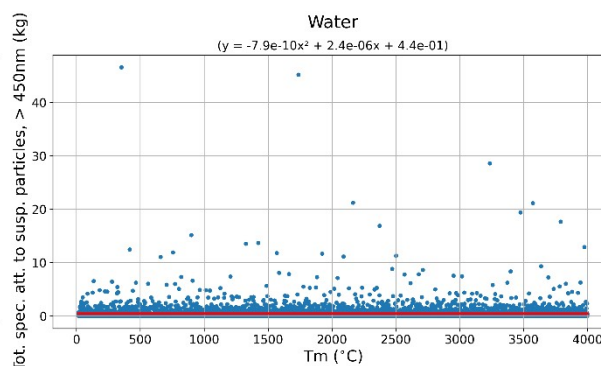

341

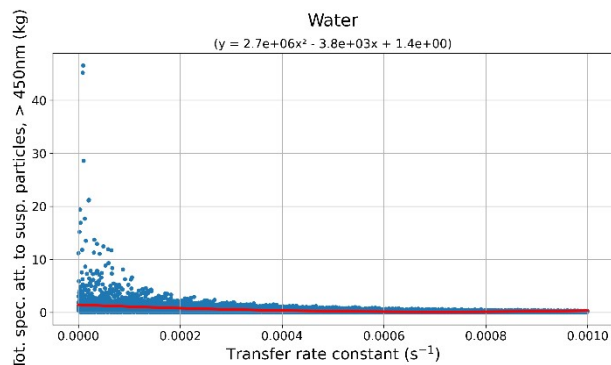

342

**Figure S29.** Scatter plots of the 10,000 simulation outputs generated with the *SimpleBox4nano* web application for the species attached to suspended particles (> 450 nm) (P) under the solid-species emission scenario (1000 t y<sup>-1</sup>) to the water compartment at the moderate (global-scale) zone. Each panel corresponds to one of the 13 physicochemical parameters (x-axis), plotted against the resulting total dissolved/gas mass (kg) at steady state (y-axis). Fitted second-order polynomial curves are included in each panel to provide an initial visual indication of non-linear trends.

347

348 **S11. Pareto analysis for D species under three different emission scenarios**

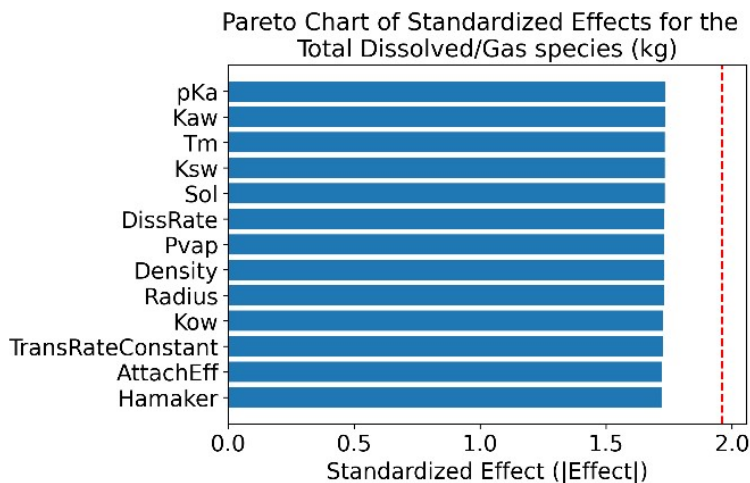

349

350 **Figure S30.** Pareto chart of standardized main effects for the total dissolved/gas species (D-species) mass output, as generated  
 351 with the *SimpleBox4nano* web application under the solid-species emission scenario to the air compartment at the moderate  
 352 (global-scale) zone. Horizontal bars indicate the magnitude and direction of each standardized main effect for the 13  
 353 physicochemical parameters. The vertical dotted red line denotes the statistical significance threshold ( $\alpha = 0.05$ ), above which  
 354 parameter effects are considered statistically significant.

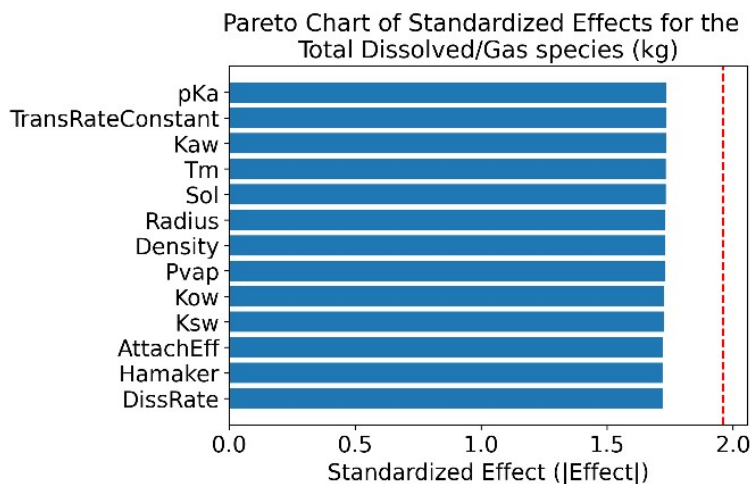

355

356 **Figure S31.** Pareto chart of standardized main effects for the total dissolved/gas species (D-species) mass output, as generated  
 357 with the *SimpleBox4nano* web application under the solid-species emission scenario to the soil compartment at the moderate  
 358 (global-scale) zone. Horizontal bars indicate the magnitude and direction of each standardized main effect for the 13  
 359 physicochemical parameters. The vertical dotted red line denotes the statistical significance threshold ( $\alpha = 0.05$ ), above which  
 360 parameter effects are considered statistically significant.

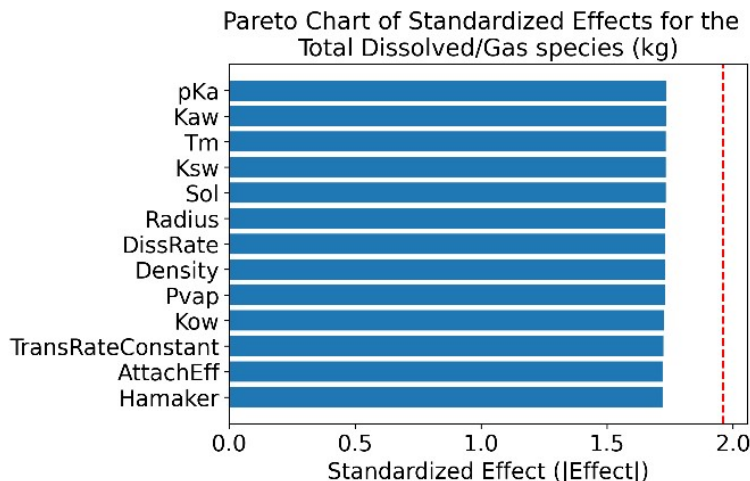

361

362 **Figure S32.** Pareto chart of standardized main effects for the total dissolved/gas species (D-species) mass output, as generated  
 363 with the *SimpleBox4nano* web application under the solid-species emission scenario to the water compartment at the moderate  
 364 (global-scale) zone. Horizontal bars indicate the magnitude and direction of each standardized main effect for the 13  
 365 physicochemical parameters. The vertical dotted red line denotes the statistical significance threshold ( $\alpha = 0.05$ ), above which  
 366 parameter effects are considered statistically significant.

367 **S12. Sensitivity Exploration**

368 **S12.1 Solid-species emissions (1000 t y<sup>-1</sup>) in soil compartment of the moderate (global scale) zone**

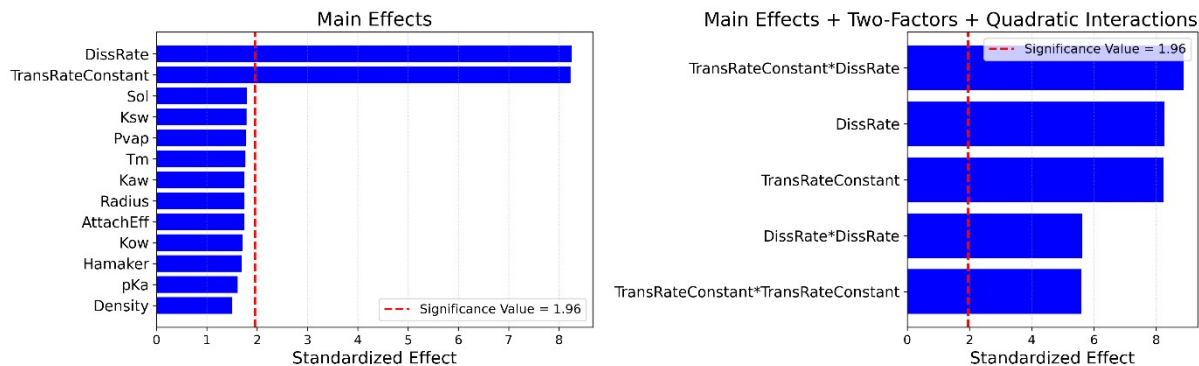

369

370 **Figure S33.** Pareto charts of standardized effects for the total solid-associated mass (S + A + P) under a solid-species emission of  
 371 1000 t y<sup>-1</sup> in soil compartment of the moderate (global scale) zone. Left chart presents the main-effects Pareto chart for all 13  
 372 physicochemical parameters. Right chart presents Pareto chart including main, two-factor interaction, and quadratic terms for the  
 373 three influential properties observed in the left chart. The vertical red dashed line denotes in both charts the statistical significance  
 374 threshold.

375

376 **S12.2 Solid-species emissions (1000 t y<sup>-1</sup>) in water compartment of the moderate (global scale) zone**

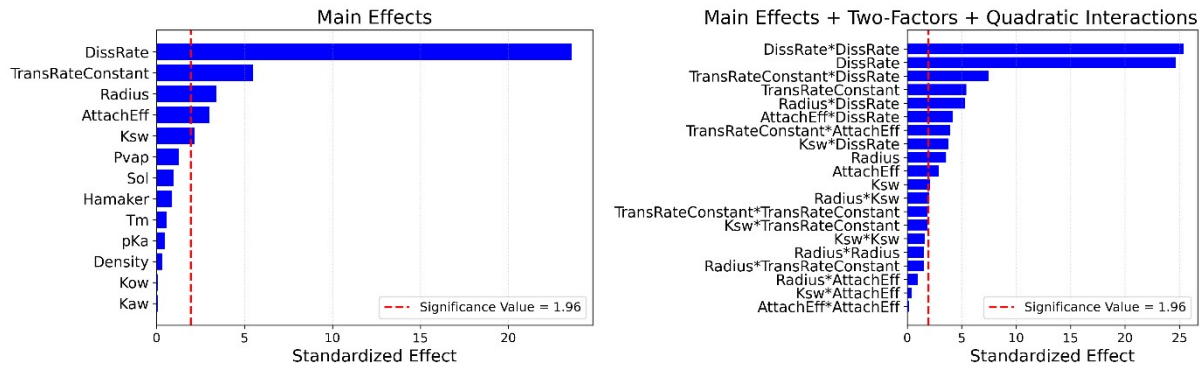

377

378 **Figure S34.** Pareto charts of standardized effects for the total solid-associated mass (S + A + P) under a solid-species emission of  
 379 1000 t y<sup>-1</sup> in water compartment of the moderate (global scale) zone. Left chart presents the main-effects Pareto chart for all 13  
 380 physicochemical parameters. Right chart presents Pareto chart including main, two-factor interaction, and quadratic terms for the  
 381 three influential properties observed in the left chart. The vertical red dashed line denotes in both charts the statistical significance  
 382 threshold.

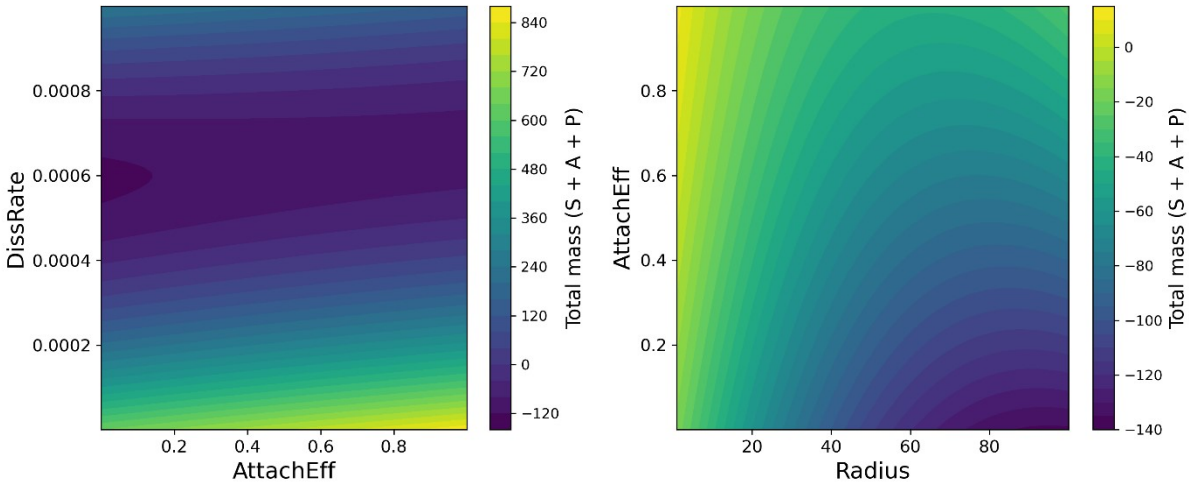

383

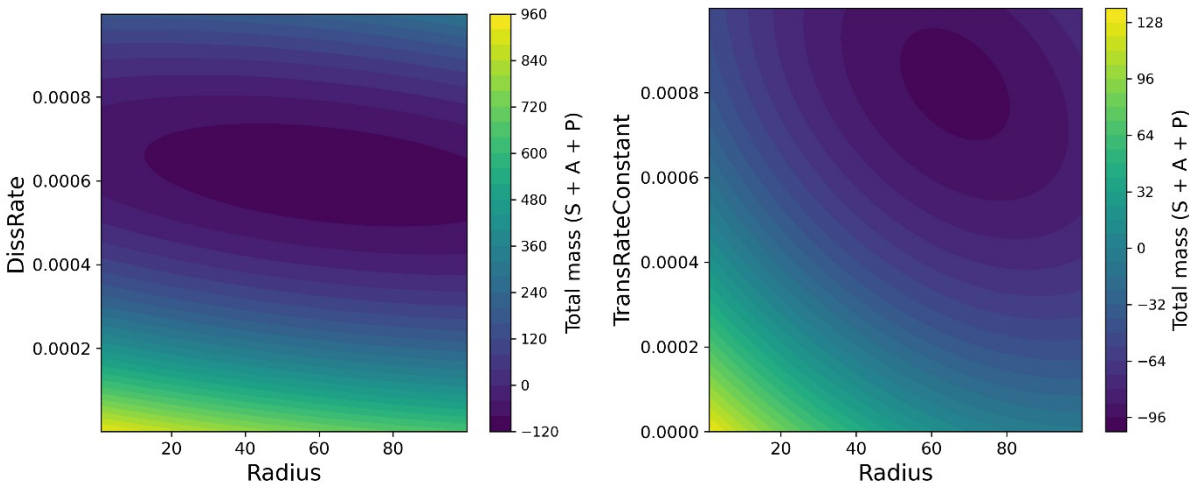

384

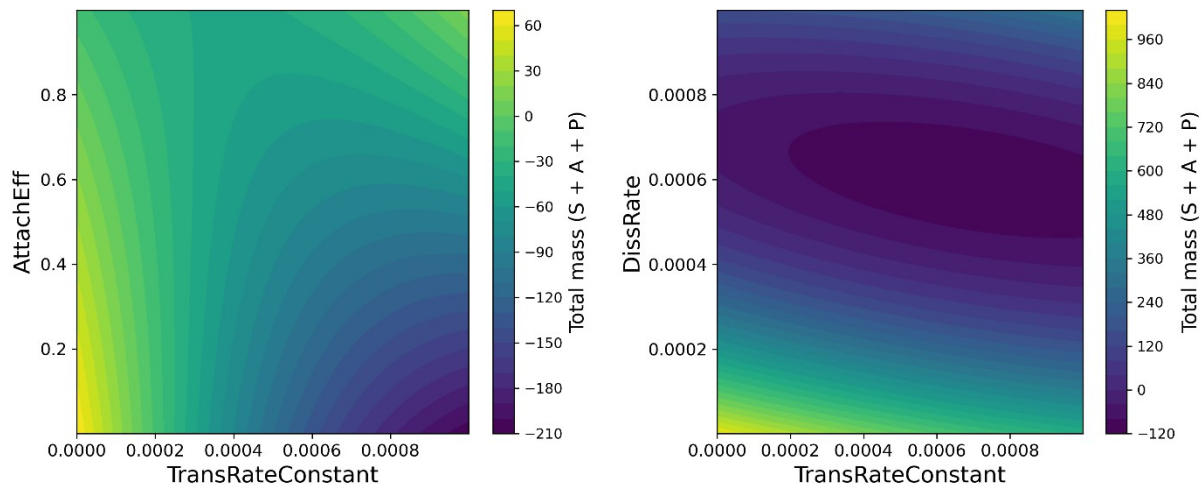

385

386 **Figure S35.** Two-factor response surfaces (heat maps) of the predicted total solid-associated mass (S + A + P) for the default  
 387 engineered nanomaterial under a solid-species emission of  $1000 \text{ t}\cdot\text{y}^{-1}$  to the water compartment of the moderate (global-scale)  
 388 zone. The colour scale indicates the steady-state total mass of S + A + P (kg), with cooler colours corresponding to lower values.

### 389 References

- 390 (1) Baig, N.; Kammakam, I.; Falath, W. Nanomaterials: A review of synthesis methods, properties,  
 391 recent progress, and challenges. *Materials advances* **2021**, *2* (6), 1821-1871.
- 392 (2) Tadjiki, S.; Montañó, M. D.; Assemi, S.; Barber, A.; Ranville, J.; Beckett, R. Measurement of the  
 393 density of engineered silver nanoparticles using centrifugal FFF-TEM and single particle ICP-MS.  
 394 *Analytical Chemistry* **2017**, *89* (11), 6056-6064.
- 395 (3) Widehammar, H. Molecular insight into ion interactions at charged interfaces exposing sulfonate  
 396 headgroups. 2021.
- 397 (4) Morillas-Becerril, L.; Franco-Ulloa, S.; Fortunati, I.; Marotta, R.; Sun, X.; Zaroni, G.; De Vivo, M.;  
 398 Mancin, F. Specific and nondisruptive interaction of guanidium-functionalized gold nanoparticles with  
 399 neutral phospholipid bilayers. *Communications Chemistry* **2021**, *4* (1), 93.
- 400 (5) Cedillos-Barraza, O.; Manara, D.; Boboridis, K.; Watkins, T.; Grasso, S.; Jayaseelan, D. D.; Konings, R.  
 401 J.; Reece, M. J.; Lee, W. E. Investigating the highest melting temperature materials: A laser melting study  
 402 of the TaC-HfC system. *Scientific reports* **2016**, *6* (1), 37962.
- 403 (6) Florendo, M.; Figacz, A.; Srinageshwar, B.; Sharma, A.; Swanson, D.; Dunbar, G. L.; Rossignol, J. Use of  
 404 polyamidoamine dendrimers in brain diseases. *Molecules* **2018**, *23* (9), 2238.
- 405 (7) Jafvert, C. T.; Kulkarni, P. P. Buckminsterfullerene's (C60) octanol- water partition coefficient ( $K_{ow}$ )  
 406 and aqueous solubility. *Environmental science & technology* **2008**, *42* (16), 5945-5950.
- 407 (8) Crandon, L. E.; Boenisch, K. M.; Harper, B. J.; Harper, S. L. Adaptive methodology to determine  
 408 hydrophobicity of nanomaterials in situ. *PLoS One* **2020**, *15* (6), e0233844.
- 409 (9) Meesters, J.; Peijnenburg, W.; Hendriks, A.; Van de Meent, D.; Quik, J. A model sensitivity analysis to  
 410 determine the most important physicochemical properties driving environmental fate and exposure of  
 411 engineered nanoparticles. *Environmental Science: Nano* **2019**, *6* (7), 2049-2060.
- 412 (10) Hedberg, J.; Blomberg, E.; Odnevall Wallinder, I. In the search for nanospecific effects of dissolution  
 413 of metallic nanoparticles at freshwater-like conditions: a critical review. *Environmental science &*  
 414 *technology* **2019**, *53* (8), 4030-4044.
- 415 (11) Petosa, A. R.; Jaisi, D. P.; Quevedo, I. R.; Elimelech, M.; Tufenkji, N. Aggregation and deposition of  
 416 engineered nanomaterials in aquatic environments: role of physicochemical interactions. *Environmental*  
 417 *science & technology* **2010**, *44* (17), 6532-6549.
